# Supplementary material for: One-pot synthesis of 3-trifluoromethylbenzo[b][1,4]oxazines from CF3-imidoyl sulfoxonium ylides with 2-bromophenols
Source: Royal Society of Chemistry journal article supplement (doi:10.1039/d2cc04863a), 2022-01-01

# Supporting Information

## One pot synthesis of 3-trifluoromethylbenzo[*b*][1,4]oxazines from CF<sub>3</sub>-imidoyl sulfoxonium ylides with 2-bromophenols

Mingshi Pan, Yixin Tong, Xiaodong Qiu, Xiaobao Zeng and Biao Xiong\*

School of Pharmacy, Nantong University, 19 Qixiu Road, Nantong, Jiangsu Province 226001, China.

### Table of contents

|                                                            |         |
|------------------------------------------------------------|---------|
| General information                                        | S2      |
| Preparation of CF <sub>3</sub> -imidoyl sulfoxonium ylides | S3-S6   |
| Screening of reaction conditions                           | S6-S9   |
| Typical procedure for the synthesis of <b>3aa</b>          | S9      |
| Substrates employed for synthesis                          | S10     |
| References                                                 | S10     |
| GC-MS spectrums of control experiments                     | S11-S12 |
| Gram-scale reaction and derivatization of <b>3aa</b>       | S13-S15 |
| Single crystal X-ray diffraction of <b>3ga</b>             | S16-S17 |
| Analytical data of the obtained compounds                  | S18-S32 |
| NMR spectra of obtained compounds                          | S33-S90 |

## **General information**

All the obtained products were characterized by melting points (m.p),  $^1\text{H-NMR}$ ,  $^{13}\text{C-NMR}$ ,  $^{19}\text{F-NMR}$  and high-resolution mass spectrum (HRMS). Melting points were measured on an Electrothermal SGW-X4 microscopy digital melting point apparatus and are uncorrected; high-resolution mass spectra were recorded on a FTLA2000 spectrometer.  $^1\text{H-NMR}$ ,  $^{13}\text{C-NMR}$  and  $^{19}\text{F-NMR}$  spectra were obtained on Bruker-400, and the chemical shifts of deuterated chloroform are 7.26 ppm and 77 ppm in  $^1\text{H-NMR}$  and  $^{13}\text{C-NMR}$  with TMS as internal standard (0 ppm), respectively. Chemical shifts were reported in parts per million (ppm,  $\delta$ ) downfield from tetramethylsilane. Proton coupling patterns are described as singlet (s), doublet (d), triplet (t), multiplet (m); TLC was performed using commercially prepared 100-400 mesh silica gel plates (GF254), and visualization was effected at 254 nm; Unless otherwise stated, all the reagents were purchased from commercial sources (J&KChemic, TCI, Bidepharm, Aladdin, SCRC), used without further purification.

**Table S1. Preparation of CF<sub>3</sub>-imidoyl sulfoxonium ylides (2a-2o)**

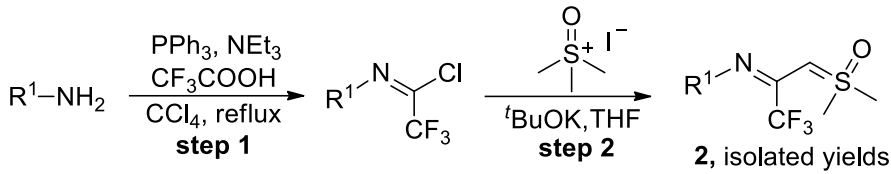

| Entry | R <sup>1</sup>                                  | <b>2</b> <sup>[ref.]</sup> , Yield |
|-------|-------------------------------------------------|------------------------------------|
| 1     | C <sub>6</sub> H <sub>5</sub>                   | <b>2a</b> <sup>[3]</sup> , 90%     |
| 2     | 4-MeC <sub>6</sub> H <sub>4</sub>               | <b>2b</b> <sup>[3]</sup> , 92%     |
| 3     | 3-MeC <sub>6</sub> H <sub>4</sub>               | <b>2c</b> <sup>[3]</sup> , 91%     |
| 4     | 2-MeC <sub>6</sub> H <sub>4</sub>               | <b>2d</b> <sup>[3]</sup> , 86%     |
| 5     | 4-OMeC <sub>6</sub> H <sub>4</sub>              | <b>2e</b> <sup>[3]</sup> , 90%     |
| 6     | 4-ClC <sub>6</sub> H <sub>4</sub>               | <b>2f</b> <sup>[3]</sup> , 88%     |
| 7     | 4-BrC <sub>6</sub> H <sub>4</sub>               | <b>2g</b> <sup>[3]</sup> , 84%     |
| 8     | 4-CF <sub>3</sub> C <sub>6</sub> H <sub>4</sub> | <b>2h</b> <sup>[3]</sup> , 84%     |
| 9     | 4-CNC <sub>6</sub> H <sub>4</sub>               | <b>2i</b> <sup>[3]</sup> , 87%     |
| 10    | 3-NO <sub>2</sub> C <sub>6</sub> H <sub>4</sub> | <b>2j</b> , 86%                    |
| 11    | 3,4-OMeC <sub>6</sub> H <sub>3</sub>            | <b>2k</b> , 91%                    |
| 12    | benzo[ <i>d</i> ][1,3]dioxol-5-yl               | <b>2l</b> , 89%                    |
| 13    | pyridin-3-yl                                    | <b>2m</b> , 83%                    |
| 14    | α-naphthyl                                      | <b>2n</b> , 85%                    |
| 15    | n-hexyl                                         | <b>2o</b> , 82%                    |

The preparation of ylides **2** was similar to the literature procedures.<sup>[1-3]</sup>

**Step 1:** To a solution of triphenylphosphine (21.48 g, 82 mmol) and triethylamine (3.25g, 32.2 mmol) in CCl<sub>4</sub> (100 mL), trifluoroacetic acid (3.13 g, 27.4 mmol) were added dropwise at 0 °C. After stirring for 10~15 min at 0 °C, the amine (27.4 mmol) was added by syringe. The mixture was refluxed for 4 hours and then cooled at room temperature, and filtered under reduced pressure. The filtrate was concentrated under vacuum, and the resulting residue was purified by flash chromatography on silica gel with petroleum ether.

**Step 2:** To a suspension of trimethylsulfoxonium iodide (6.60 g, 30 mmol) in THF (150 mL), <sup>t</sup>BuOK (3.36 g, 30 mmol) were added in portion and the mixture was stirred at room temperature for 2 hours under N<sub>2</sub> atmosphere. Then, fluorinated acetimidoyl chloride (10 mmol) was added by syringe. The mixture was stirred at room temperature for 3 hours and then filtered through celite before all volatiles were removed by reduced pressure distillation. Purification by flash chromatography (DCM/MeOH = 100: 1) afforded products.

**Analytical data of synthesized unknown CF<sub>3</sub>-imidoyl sulfoxonium ylides**

**(*E*)-*N*-(3-nitrophenyl)-3-(dimethyl(oxo)-λ<sup>6</sup>-sulfanylidene)-1,1,1-trifluoropropan-2-imine (2j)**

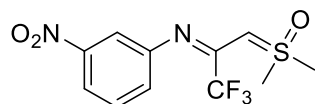

Yellow solid (2.65 g, 86% yield); m.p: 96-97 °C; <sup>1</sup>H NMR (400 MHz, CDCl<sub>3</sub>): δ 7.82 (dd, *J* = 8.0 Hz, 2.0 Hz, 1H), 7.63 (s, 1H), 7.37 (t, *J* = 8.0 Hz, 1H), 7.11 (dd, *J* = 8.0 Hz, 2.0 Hz, 1H), 4.28 (s, 1H), 3.51 (s, 6H). <sup>13</sup>C NMR (101 MHz, CDCl<sub>3</sub>): δ 151.55, 148.51, 131.20, 129.15, 127.46, 117.05, 115.84, 61.76, 41.35. HRMS (ESI): Calcd. for C<sub>11</sub>H<sub>11</sub>F<sub>3</sub>N<sub>2</sub>O<sub>3</sub>S [M+H]<sup>+</sup>: 309.0515; found: 309.0514.

**(*E*)-*N*-(3,4-dimethoxyphenyl)-3-(dimethyl(oxo)-λ<sup>6</sup>-sulfanylidene)-1,1,1-trifluoropropan-2-imine (2k)**

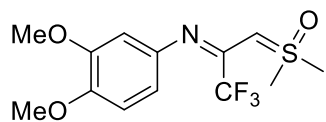

Yellow solid (2.93 g, 91% yield); m.p: 88-89 °C; <sup>1</sup>H NMR (400 MHz, CDCl<sub>3</sub>): δ 6.77 (d, *J* = 8.8 Hz, 1H), 6.44 (s, 1H), 6.34 (d, *J* = 8.4 Hz, 1H), 4.12 (s, 1H), 3.85 (s, 3H), 3.84 (s, 3H), 3.42 (s, 6H). <sup>13</sup>C NMR (101 MHz, CDCl<sub>3</sub>): δ 148.96, 144.67, 144.00, 111.55, 111.35, 105.27, 59.45, 56.08, 55.79, 40.99 HRMS (ESI): Calcd. for C<sub>13</sub>H<sub>16</sub>F<sub>3</sub>NO<sub>3</sub>S [M+H]<sup>+</sup>: 324.0876; found: 324.0874.

**(E)-N-(benzo[d][1,3]dioxol-5-yl)-3-(dimethyl(oxo)-λ<sup>6</sup>-sulfanylidene)-1,1,1-trifluoropropan-2-imine (2l)**

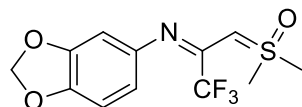

Yellow solid (2.73 g, 89% yield); m.p: 112-113 °C; <sup>1</sup>H NMR (400 MHz, CDCl<sub>3</sub>): δ 6.69 (d, *J* = 8.0 Hz, 1H), 6.37 (m, 1H), 6.22 (d, *J* = 8.0 Hz, 1H), 5.91 (s, 2H), 4.14 (s, 1H), 3.46 (s, 4.5H) 3.24 (s, 1.5H). <sup>13</sup>C NMR (101 MHz, CDCl<sub>3</sub>): δ 147.51, 144.96, 142.81, 112.64, 107.78, 102.65, 100.90, 59.51, 41.26. HRMS (ESI): Calcd. for C<sub>12</sub>H<sub>12</sub>F<sub>3</sub>NO<sub>3</sub>S [M+H]<sup>+</sup>: 308.0563; found: 308.0559.

**(E)-N-(pyridin-3-yl)-3-(dimethyl(oxo)-λ<sup>6</sup>-sulfanylidene)-1,1,1-trifluoropropan-2-imine (2m)**

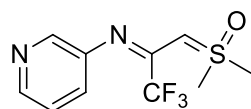

Yellow solid (2.19 g, 83% yield); m.p: 147-148 °C; <sup>1</sup>H NMR (400 MHz, CDCl<sub>3</sub>): δ 8.23 (d, *J* = 4.4 Hz, 1H), 8.11 (s, 1H), 7.22-7.07 (m, 2H), 4.25 (s, 1H), 3.49 (s, 6H). <sup>13</sup>C NMR (101 MHz, CDCl<sub>3</sub>): δ 146.51, 143.49, 142.45, 127.79, 123.19, 61.21, 41.24. HRMS (ESI): Calcd. for C<sub>10</sub>H<sub>11</sub>F<sub>3</sub>N<sub>2</sub>OS [M+H]<sup>+</sup>: 265.0617; found: 265.0613.

**(E)-N-(naphthalen-1-yl)-3-(dimethyl(oxo)-λ<sup>6</sup>-sulfanylidene)-1,1,1-trifluoropropan-2-imine (2n)**

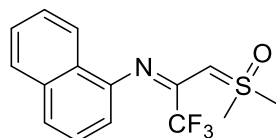

Reddish brown solid (2.66 g, 85% yield); m.p: 50-51 °C; <sup>1</sup>H NMR (400 MHz, CDCl<sub>3</sub>): δ 7.81-7.63 (m, 2H), 7.48-7.22 (m, 4H), 6.68 (s, 1H), 4.16 (s, 1H), 3.31 (s, 6H). <sup>13</sup>C NMR (101 MHz, CDCl<sub>3</sub>): δ 146.98, 134.14, 127.92, 125.97, 125.21, 124.02, 122.51, 114.57, 60.39, 41.72. HRMS (ESI): Calcd. for C<sub>15</sub>H<sub>14</sub>F<sub>3</sub>NOS [M+H]<sup>+</sup>: 314.0821; found: 314.0819.

**(E)-N-(n-hexyl)-3-(dimethyl(oxo)-λ<sup>6</sup>-sulfanylidene)-1,1,1-trifluoropropan-2-imine**  
**(2o)**

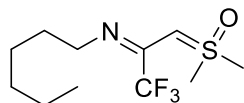

Yellow oil (2.22 g, 82% yield); <sup>1</sup>H NMR (400 MHz, CDCl<sub>3</sub>): δ 3.90 (s, 1H), 3.40 (s, 6H), 1.58 (t, *J* = 6.8 Hz, 2H), 1.41-1.27 (m, 8H), 0.89 (t, *J* = 6.8 Hz, 3H). <sup>13</sup>C NMR (101 MHz, CDCl<sub>3</sub>): δ 56.12, 50.48, 41.42, 31.70, 29.66, 27.24, 22.65, 14.06. HRMS (ESI): Calcd. for C<sub>11</sub>H<sub>20</sub>F<sub>3</sub>NOS [M+H]<sup>+</sup>: 272.1290; found: 272.1287.

**Screening of reaction conditions**

**Table S2. Screening of the reaction conditions of ylide insertion<sup>a</sup>**

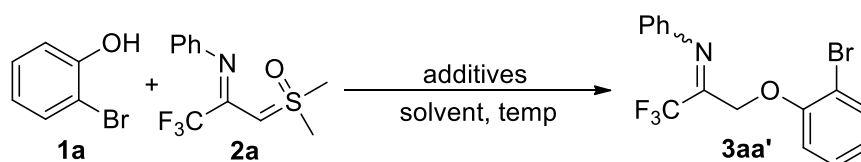

| Entry | Solvent     | Additive          | Temp (°C) | Yield of <b>3aa'</b> (%) <sup>b</sup> |
|-------|-------------|-------------------|-----------|---------------------------------------|
| 1     | MeCN        | LiBr              | 80        | 95                                    |
| 2     | DMF         | LiBr              | 80        | 77                                    |
| 3     | Toluene     | LiBr              | 80        | 26                                    |
| 4     | 1,4-Dioxane | LiBr              | 80        | 26                                    |
| 5     | THF         | LiBr              | 80        | 35                                    |
| 6     | MeCN        | LiBr              | 70        | 85                                    |
| 7     | MeCN        | LiBr              | 90        | 95                                    |
| 8     | MeCN        | LiCl              | 80        | Trace                                 |
| 9     | MeCN        | KBr               | 80        | Trace                                 |
| 10    | MeCN        | ZnBr <sub>2</sub> | 80        | 0                                     |
| 11    | MeCN        | TiCl <sub>4</sub> | 80        | 0                                     |
| 12    | MeCN        | LiBr              | 80        | (37, 95) <sup>c</sup>                 |

<sup>a</sup> Unless otherwise stated, the reaction was performed with **1a** (0.3 mmol), **2a** (0.3 mmol), additive (100 mmol%) in solvent (1.0 mL) at 80 °C for 2 hours under N<sub>2</sub>. <sup>b</sup> GC yield. <sup>c</sup> Yields are with respect to use 50 mmol% and 150 mmol% of LiBr, respectively.

In the step of O-H insertion of CF<sub>3</sub>-imidoyl sulfoxonium ylides, by performing the reaction at 80°C in the presence of LiBr under N<sub>2</sub> condition, we tested the effect of different solvents, respectively (Table S2, entries 1-5). Gratifyingly, MeCN exhibits good result to give **3aa'** in 95% yield. The screening of temperature reveals that MeCN heated to 80°C is sufficient (entry 6-7). Then, other four Lewis acids showed to be invalid for the transformation as compared to LiBr (entry 8-11). Finally, screening the amount of LiBr reveals that 100 mmol% is optimal (entry 13).

In the step of Buchwald–Hartwig reaction, by performing the reaction in toluene at 110°C in the presence of NaOH under N<sub>2</sub> condition, we tested the effect of different ligands with Pd(OAc)<sub>2</sub>, respectively (Table S3, entries 1-14). To our delight, (t-Bu)<sub>3</sub>P exhibited good effect to give **3aa** in 91% yield (entry 8). Next, four different catalysts were employed into the protocol to examine the catalyst system, and the results show that Pd(OAc)<sub>2</sub> remains the most suitable catalyst (entries 15-18). Then, several solvents such as dioxane, DMF, THF, MeCN, and *p*-Xylene were investigated (entries 19–23). However, all these solvents decreased the yield in different degrees relative to toluene. Then, other eight bases showed to be less effective for the transformation as compared to NaOH (entry 24-31). Finally, the screening of temperature reveals that toluene heated to 100 °C is suitable (entry 32).

**Table S3. Screening of the reaction conditions<sup>a</sup>**

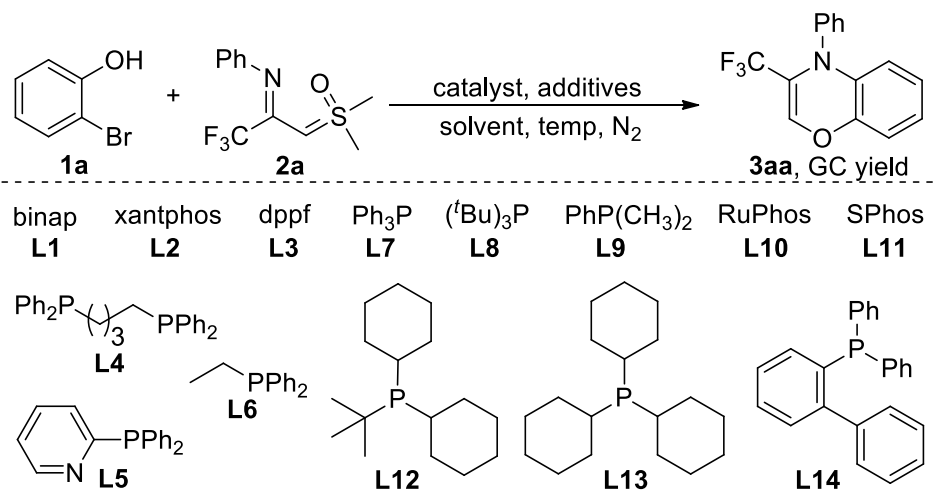

| Entry | Catalyst                                           | Ligand     | Solvent          | Base                            | Yield (%) <sup>b</sup> |
|-------|----------------------------------------------------|------------|------------------|---------------------------------|------------------------|
| 1     | Pd(OAc) <sub>2</sub>                               | <b>L1</b>  | Toluene          | NaOH                            | 53                     |
| 2     | Pd(OAc) <sub>2</sub>                               | <b>L2</b>  | Toluene          | NaOH                            | 45                     |
| 3     | Pd(OAc) <sub>2</sub>                               | <b>L3</b>  | Toluene          | NaOH                            | 18                     |
| 4     | Pd(OAc) <sub>2</sub>                               | <b>L4</b>  | Toluene          | NaOH                            | 10                     |
| 5     | Pd(OAc) <sub>2</sub>                               | <b>L5</b>  | Toluene          | NaOH                            | 31                     |
| 6     | Pd(OAc) <sub>2</sub>                               | <b>L6</b>  | Toluene          | NaOH                            | 22                     |
| 7     | Pd(OAc) <sub>2</sub>                               | <b>L7</b>  | Toluene          | NaOH                            | 17                     |
| 8     | Pd(OAc) <sub>2</sub>                               | <b>L8</b>  | Toluene          | NaOH                            | 91                     |
| 9     | Pd(OAc) <sub>2</sub>                               | <b>L9</b>  | Toluene          | NaOH                            | 19                     |
| 10    | Pd(OAc) <sub>2</sub>                               | <b>L10</b> | Toluene          | NaOH                            | 70                     |
| 11    | Pd(OAc) <sub>2</sub>                               | <b>L11</b> | Toluene          | NaOH                            | 72                     |
| 12    | Pd(OAc) <sub>2</sub>                               | <b>L12</b> | Toluene          | NaOH                            | 74                     |
| 13    | Pd(OAc) <sub>2</sub>                               | <b>L13</b> | Toluene          | NaOH                            | 30                     |
| 14    | Pd(OAc) <sub>2</sub>                               | <b>L14</b> | Toluene          | NaOH                            | 28                     |
| 15    | Pd(PPh <sub>3</sub> ) <sub>4</sub>                 | <b>L8</b>  | Toluene          | NaOH                            | 24                     |
| 16    | Pd(PPh <sub>3</sub> ) <sub>2</sub> Cl <sub>2</sub> | <b>L8</b>  | Toluene          | NaOH                            | 78                     |
| 17    | PdCl <sub>2</sub>                                  | <b>L8</b>  | Toluene          | NaOH                            | 81                     |
| 18    | Pd(OH) <sub>2</sub>                                | <b>L8</b>  | Toluene          | NaOH                            | 28                     |
| 19    | Pd(OAc) <sub>2</sub>                               | <b>L8</b>  | 1,4-Dioxane      | NaOH                            | 78                     |
| 20    | Pd(OAc) <sub>2</sub>                               | <b>L8</b>  | DMF              | NaOH                            | 80                     |
| 21    | Pd(OAc) <sub>2</sub>                               | <b>L8</b>  | THF              | NaOH                            | 75                     |
| 22    | Pd(OAc) <sub>2</sub>                               | <b>L8</b>  | MeCN             | NaOH                            | 72                     |
| 23    | Pd(OAc) <sub>2</sub>                               | <b>L8</b>  | <i>p</i> -Xylene | NaOH                            | 84                     |
| 24    | Pd(OAc) <sub>2</sub>                               | <b>L8</b>  | Toluene          | <sup>t</sup> BuOK               | 22                     |
| 25    | Pd(OAc) <sub>2</sub>                               | <b>L8</b>  | Toluene          | <sup>t</sup> BuONa              | 55                     |
| 26    | Pd(OAc) <sub>2</sub>                               | <b>L8</b>  | Toluene          | K <sub>2</sub> CO <sub>3</sub>  | 32                     |
| 27    | Pd(OAc) <sub>2</sub>                               | <b>L8</b>  | Toluene          | Cs <sub>2</sub> CO <sub>3</sub> | 28                     |
| 28    | Pd(OAc) <sub>2</sub>                               | <b>L8</b>  | Toluene          | K <sub>3</sub> PO <sub>4</sub>  | 68                     |
| 29    | Pd(OAc) <sub>2</sub>                               | <b>L8</b>  | Toluene          | CsOH                            | 66                     |



|    |                      |           |         |      |                           |
|----|----------------------|-----------|---------|------|---------------------------|
| 30 | Pd(OAc) <sub>2</sub> | <b>L8</b> | Toluene | KOH  | 54                        |
| 31 | Pd(OAc) <sub>2</sub> | <b>L8</b> | Toluene | LiOH | 26                        |
| 32 | Pd(OAc) <sub>2</sub> | <b>L8</b> | Toluene | NaOH | (55, 91, 89) <sup>c</sup> |

<sup>a</sup> Unless otherwise stated, all the reaction were performed using **1a** (0.3 mmol), **2a** (0.3 mmol) and LiBr (0.3 mmol) in dry MeCN (1.0 mL) at 80 °C for 2 h under N<sub>2</sub>. Then, catalyst (5 mol %), ligand (10 mol %), base (150 mmol %) and solvent (1.5 mL) were added after removing the MeCN under vacuum, and the resulting mixture was stirred at 110 °C for 10 h under N<sub>2</sub>. <sup>b</sup> GC yield. <sup>c</sup> Yields are with respect to the temperature at 90 °C, 100 °C and 120 °C respectively.

#### Typical procedure for the synthesis of **3aa**

Under N<sub>2</sub> atmosphere, 2-bromophenol **1a** (51.6 mg, 0.3 mmol), (*E*)-3-(dimethyl(oxo)-λ<sub>6</sub>-sulfanylidene)-1,1,1-trifluoro-*N*-phenylpropan-2-imine **2a** (78.9 mg, 0.3 mmol), LiBr (25.8 mg, 100 mol %), and MeCN (1.0 mL) were added in a 25 mL Schlenk tube. Then the mixture was stirred at 80 °C for 2 hours and cooled down to room temperature. After removing the solvent under vacuum, Pd(OAc)<sub>2</sub> (3.4 mg, 5 mol %), tri-*tert*-butylphosphine (6.0 mg, 10 mol %), NaOH (18 mg, 150 mol %) and toluene (1.5 mL) were added successively. Then, the resulting mixture was stirred at 100 °C for 10 h under N<sub>2</sub>. After cooled to room temperature, the mixture was concentrated and the residue was purified by flash chromatography (petroleum ether) to give 4-phenyl-3-(trifluoromethyl)-4*H*-benzo[*b*][1,4]oxazine **3aa** as light yellow oil.

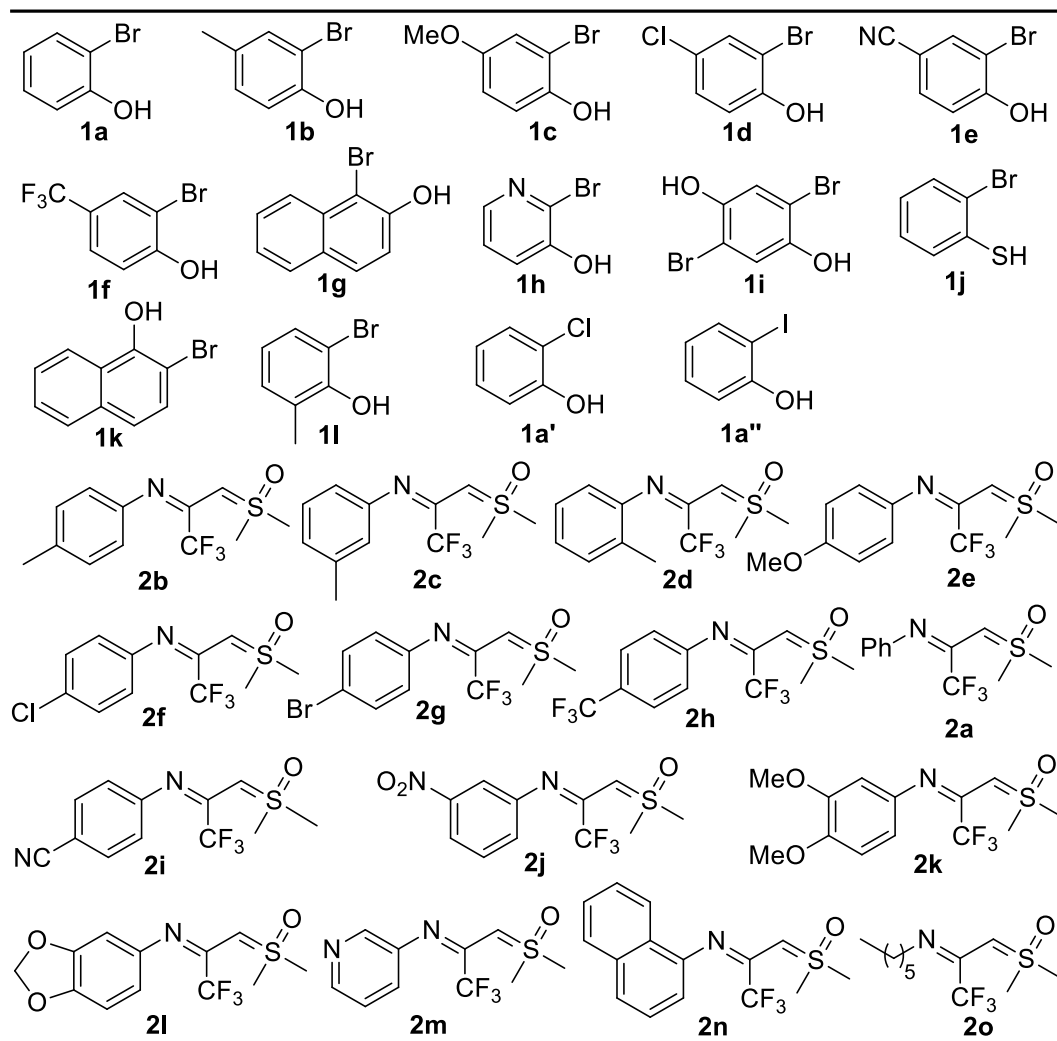

**Scheme S1.** Substrates employed for synthesizing *4H*-benzo[*b*][1,4]oxazine

## Reference

- [1] (a) Wang, Z.; Li, T.; Zhao, J.; Shi, X.; Jiao, D.; Zheng, H.; Chen, C.; Zhu, B. *Org. Lett.*, **2018**, *20*, 6640-6645; (b) Wang, L.-C.; Du, S.; Chen, Z.; Wu, X.-F. *Org. Lett.*, **2020**, *22*, 5567-5571.
- [2] (a) Dias, R. M. P.; Burtoloso, A. C. B. *Org. Lett.*, **2016**, *18*, 3034-3037; (b) Phelps, A. M.; Chan, V. S.; Napolitano, J. G.; Krabbe, S. W.; Schomaker, J. M.; Shekhar, S. *J. Org. Chem.*, **2016**, *81*, 4158-4169; (c) Barday, M.; Janot, C.; Halcovitch, N. R.; Muir, J.; Aissa, C. *Angew. Chem., Int. Ed.*, **2017**, *56*, 13117-13121.
- [3] Wen S, Tian Q, Chen Y, Zhang Y, Cheng G. *Org Lett.*, **2021**, *23*, 7407-7411.

## GC-MS spectrums of control experiments

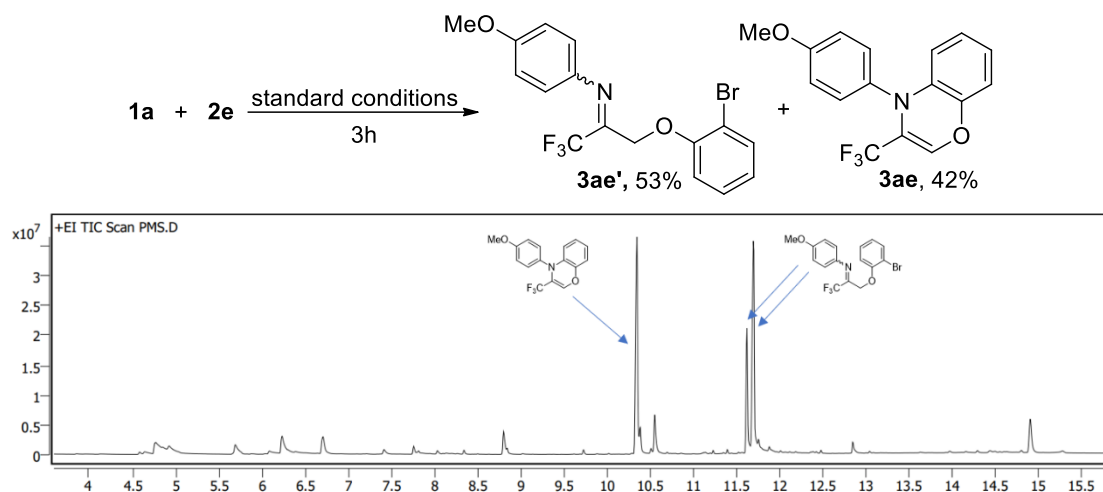

Figure S1 GC-MS of the reaction of **1a** and **2e** after 3 hours.

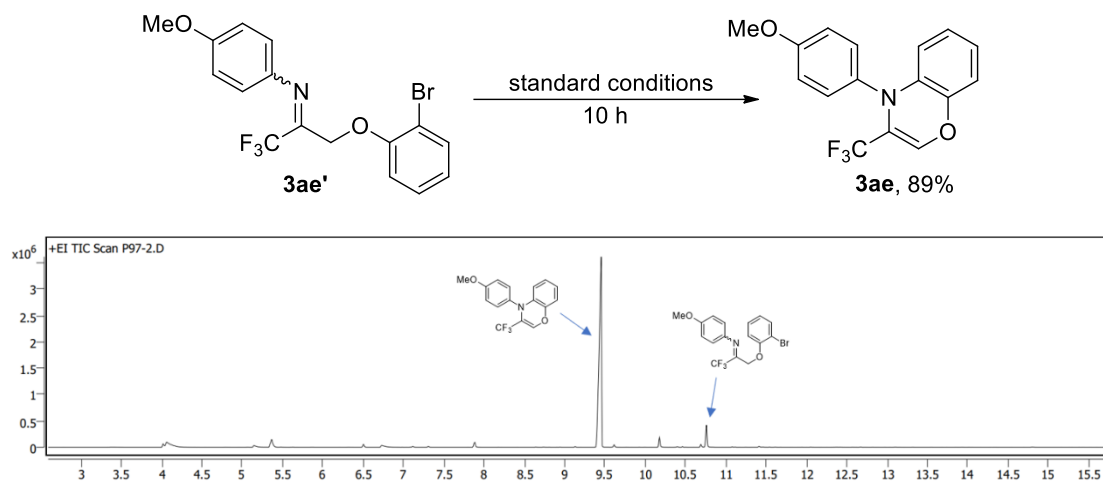

Figure S2 GC-MS of the reaction from **3ae'** after 10 hours.

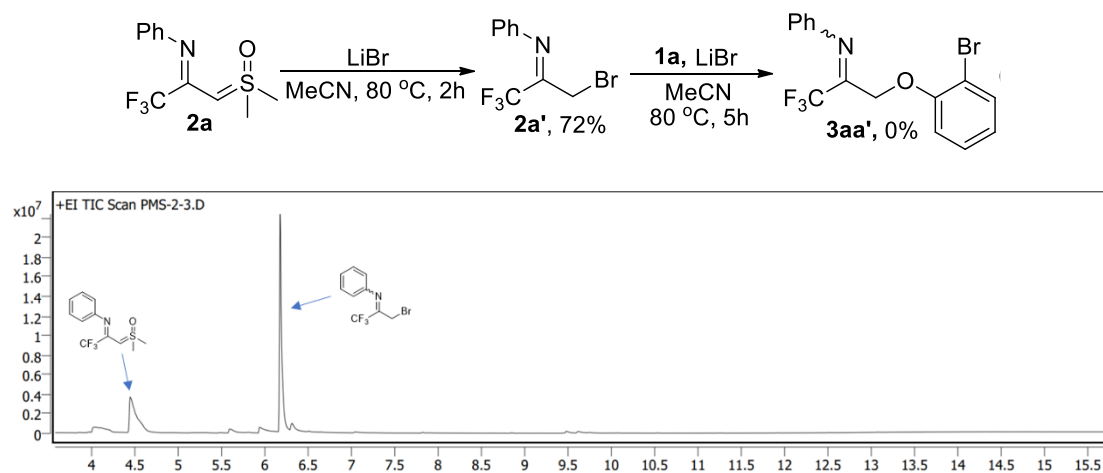

Figure S3 GC-MS of the reaction of **2a** and LiBr

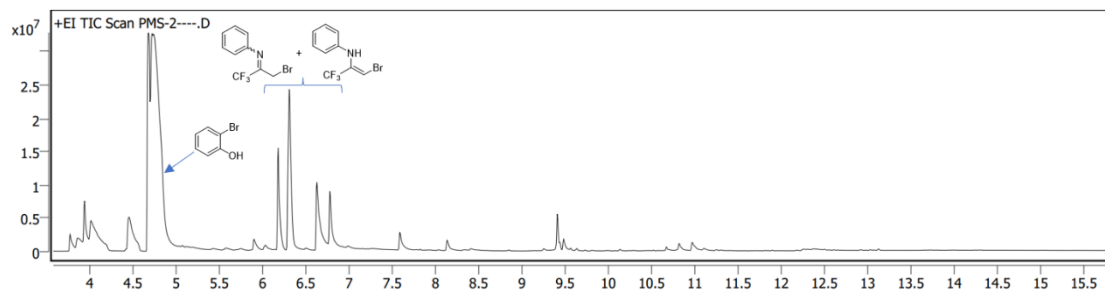

**Figure S4** GC-MS of the reaction of **1a** and **2a'**

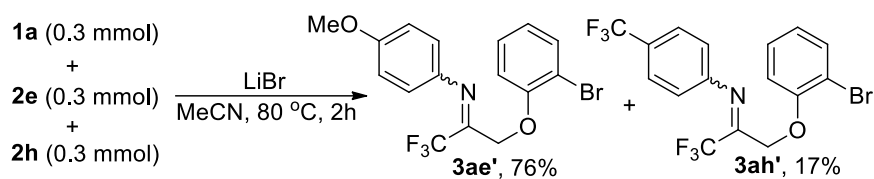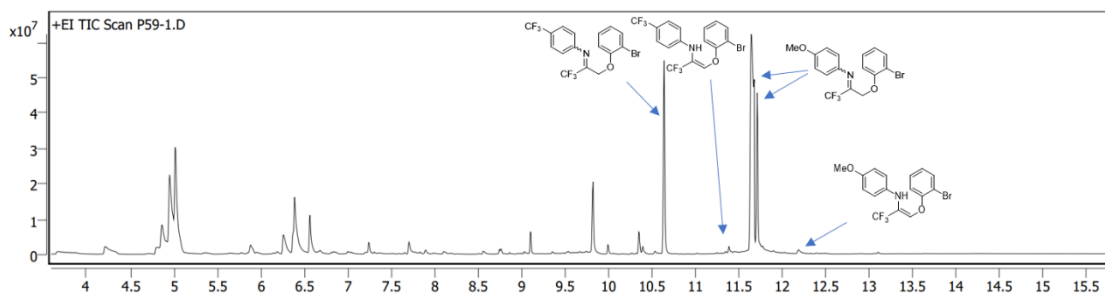

**Figure S5** GC-MS of the competition reaction of **2e** and **2h**.

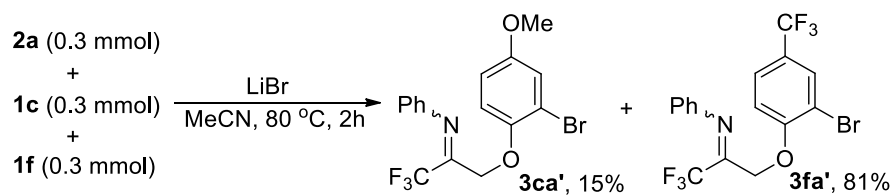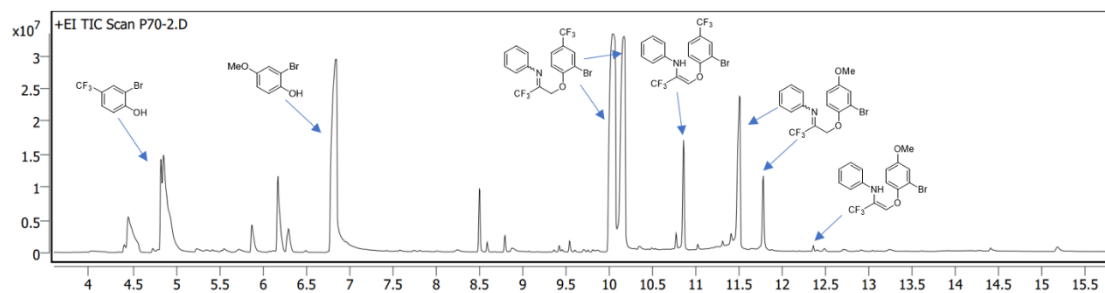

**Figure S6** GC-MS of the competition reaction of **1c** and **1f**.

## Gram-scale reaction and derivatization of **3aa**

### Details of the gram reaction

Under N<sub>2</sub> atmosphere, 2-bromophenol **1a** (0.86 g, 5.0 mmol), (*E*)-3-(dimethyl(oxo)-λ6-sulfanylidene)-1,1,1-trifluoro-*N*-phenylpropan-2-imine **2a** (1.32 g, 5.0 mmol), LiBr (0.43 g, 100 mol %), and dry MeCN (20.0 mL) were added in a 100 mL Schlenk tube. Then the mixture was stirred at 80 °C for 3 hours and cooled down to room temperature. After removing the solvent under vacuum, Pd(OAc)<sub>2</sub> (33.6 mg, 3 mol %), tri-*tert*-butylphosphine (60.0 mg, 6 mol %), NaOH (200.0 mg, 100 mol %) and toluene (20 mL) were added successively. Then, the resulting mixture was stirred at 100 °C for 20 h under N<sub>2</sub>. After cooled to room temperature, the mixture was concentrated and the residue was purified by flash chromatography (petroleum ether) to give 4-phenyl-3-(trifluoromethyl)-4*H*-benzo[*b*][1,4]oxazine **3aa** (0.90 g, 65% yield) as light yellow oil.

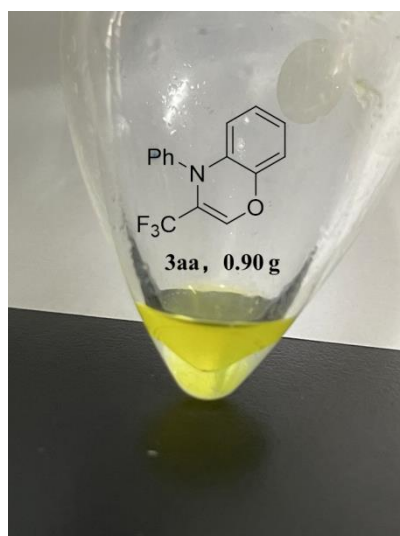

### Derivatization of **3aa**

#### 1. Synthesis of **4a**

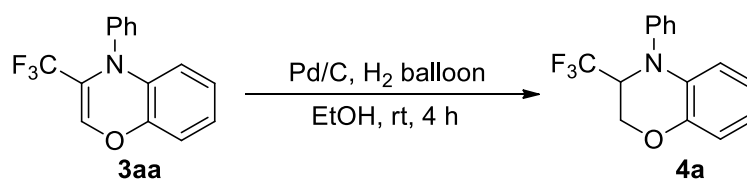

**3aa** (55.4 mg, 0.2 mmol), Pd/C (60 % wet; 10 wt %, 10 mg) and EtOH (3 mL) were

added in a flask (25 mL) which was equipped with a hydrogen balloon and stirred for 4 hours under room temperature. Then, the mixture was filtered under reduced pressure. The filtrate was concentrated under vacuum, and the resulting residue was purified by layer chromatography on silica gel with petroleum ether to give the oil product **4a** (51.9 mg, 93%).

## 2. Synthesis of **5a**

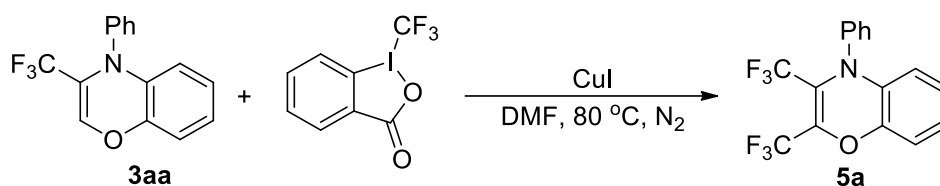

Under N<sub>2</sub> atmosphere, CuI (0.02 mmol, 3.8 mg), anhydrous DMF (1.5 mL), Togni reagent (0.3 mmol, 94.8 mg), **3aa** (0.2 mmol, 55.4 mg) were added in a Schlenk tube (25 mL). Then, the Schlenk tube was closed and stirred for 20 h under 80 °C until the disappearance of substrate **3aa** as indicated by TLC. The resulting mixture was concentrated and the residue was taken up in DCM. The organic layer was washed with brine, dried over Na<sub>2</sub>SO<sub>4</sub> and concentrated. The residue was purified with silica gel chromatography (petroleum ether) to give the colorless oil **5a** (46.9 mg, 68%).

## 3. Synthesis of **6a**

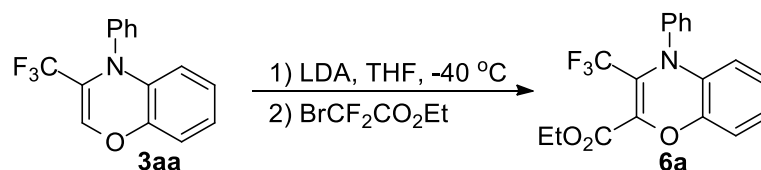

Under N<sub>2</sub> atmosphere, to a cold (-40 °C) solution of **3aa** (0.2 mmol, 55.4 mg) in dry THF (2 mL) was added a solution of LDA 2 M in heptane/THF (0.4 mmol, 0.2 mL) in a Schlenk tube (25 mL). The reaction solution was stirred at -40 °C for 35 min and ethyl bromodifluoroacetate (0.3 mmol, 60.6 mg) were added. After 20 hours, the resulting mixture was treated with a solution of saturated ammonium chloride solution, and allowed to warm to room temperature, which was extracted with EtOAc. The

organic layer was dried over  $\text{MgSO}_4$  and concentrated. The residue was purified with silica gel chromatography (petroleum ether/EtOAc = 20: 1) to give the colorless oil compound **6a** (37.0 mg, 53%).

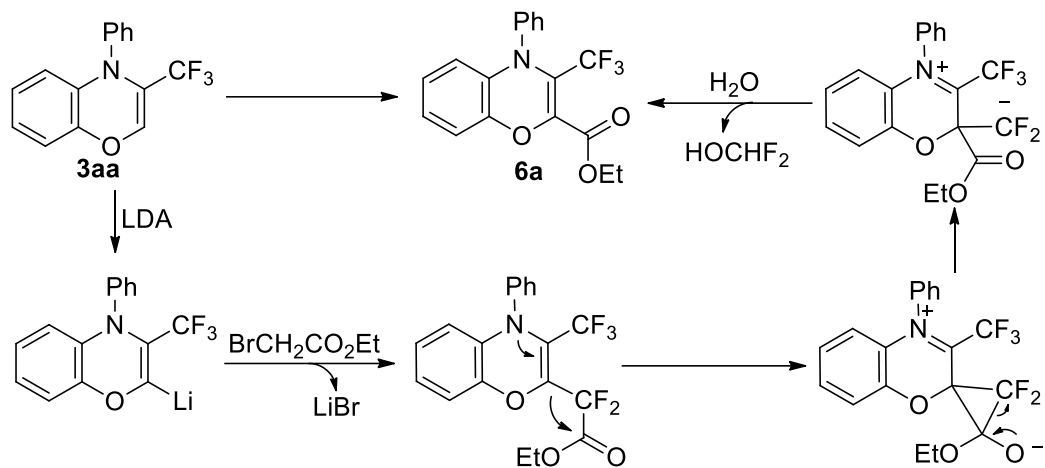

**Scheme S2.** Possible mechanism of the synthesis of **6a** from **3aa**

#### 4. Synthesis of **7a**

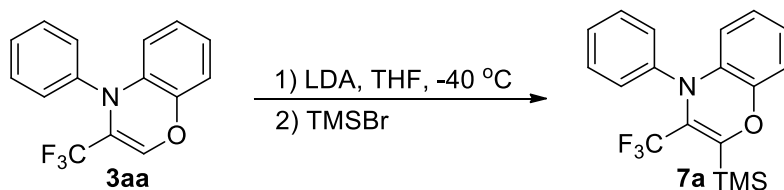

Under  $\text{N}_2$  atmosphere, to a cold ( $-40\text{ }^\circ\text{C}$ ) solution of **3aa** (0.2 mmol, 1.0 equiv) in dry THF (2 mL) was added a solution of LDA 2 M in heptane/THF (0.4 mmol, 0.2 mL) in a Schlenk tube (25 mL). The reaction solution was stirred at  $-40\text{ }^\circ\text{C}$  for 35 min and bromotrimethylsilane (0.3 mmol, 45.9 mg) were added. After 20 hours, the resulting mixture was treated with a solution of saturated ammonium chloride solution, and allowed to warm to room temperature, which was extracted with EtOAc. The organic layer was dried over  $\text{MgSO}_4$  and concentrated. The residue was purified with silica gel chromatography (Petroleum ether) to give the yellow oil product **7a** (62.1 mg, 89%).

### Single crystal X-ray diffraction of **3ga**

Colorless and transparent block-like single crystals of **3ga** were grown by layering a dichloromethane solution with n-hexane at ambient temperature. X-Ray diffraction data of one these crystals were collected on an Agilent Gemini E diffractometer. The measurements were performed with Mo-K $\alpha$  radiation ( $\lambda = 0.71073 \text{ \AA}$ ). Data were collected at 293 K, using the  $\omega$  - and  $\varphi$  - scans to a maximum  $\theta$  value of  $27.48^\circ$ . The data were refined by full-matrix least-squares techniques on  $F^2$  with OLEX-2. And the structures were solved by direct methods OLEX-2. All the non-hydrogen atoms were refined anisotropically. The hydrogen atoms were included at geometrically idealized positions. An ORTEP representation of the structure is shown below.

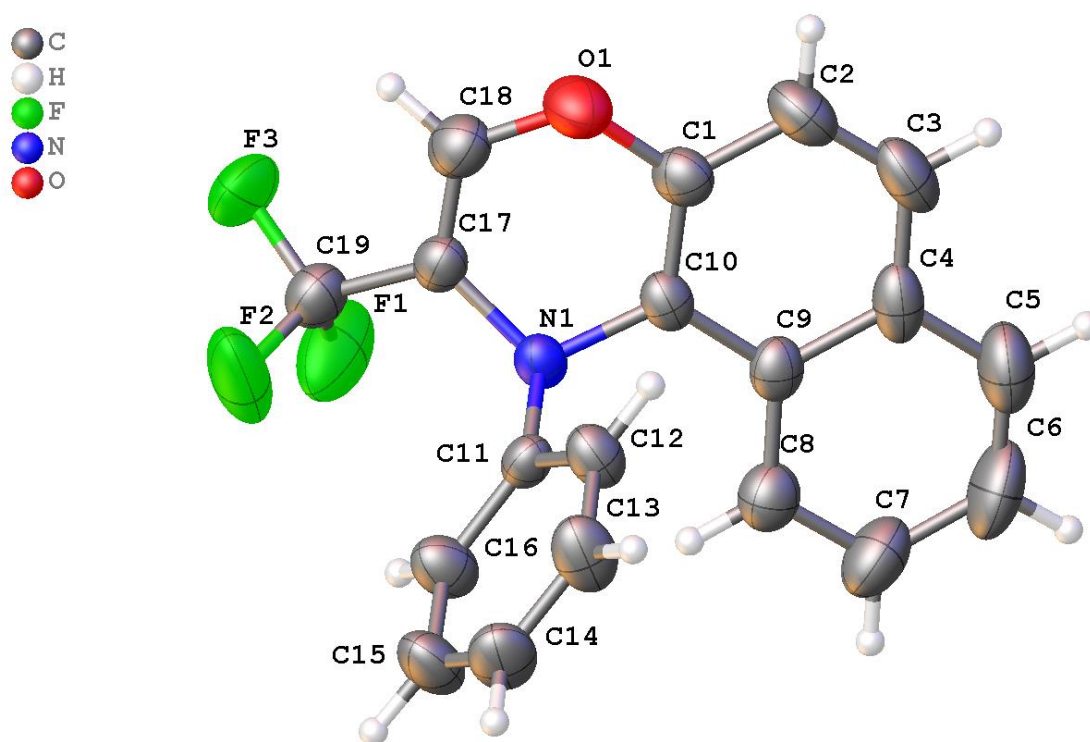

**Figure S7.** ORTEP drawing of **3ga** (CCDC 2193498) obtained by single-crystal X-ray diffraction studies with the ellipsoid contour at 30% probability levels.



**Table S4. Crystal data and structure refinement for 3ga.**

|                                             |                                                               |
|---------------------------------------------|---------------------------------------------------------------|
| Identification code                         | <b>3ga</b>                                                    |
| Empirical formula                           | C <sub>19</sub> H <sub>12</sub> F <sub>3</sub> NO             |
| Formula weight                              | 327.30                                                        |
| Temperature/K                               | 293(2)                                                        |
| Crystal system                              | monoclinic                                                    |
| Space group                                 | P 2 <sub>1</sub> /n                                           |
| a/Å                                         | 7.2901(13)                                                    |
| b/Å                                         | 7.7946(13)                                                    |
| c/Å                                         | 26.574(4)                                                     |
| α/°                                         | 90                                                            |
| β/°                                         | 95.936(15)                                                    |
| γ/°                                         | 90                                                            |
| Volume/Å <sup>3</sup>                       | 1501.9(4)                                                     |
| Z                                           | 4                                                             |
| ρ <sub>calc</sub> /g/cm <sup>3</sup>        | 1.447                                                         |
| μ/mm <sup>-1</sup>                          | 0.115                                                         |
| F(000)                                      | 672.0                                                         |
| Crystal size/mm <sup>3</sup>                | 0.2 × 0.19 × 0.18                                             |
| Radiation                                   | Mo Kα (λ = 0.71073 Å)                                         |
| 2θ range for data collection/°              | 5.448 to 58.572                                               |
| Index ranges                                | -7 ≤ h ≤ 10, -9 ≤ k ≤ 9, -36 ≤ l ≤ 26                         |
| Reflections collected                       | 8471                                                          |
| Independent reflections                     | 3506 [R <sub>int</sub> = 0.0595, R <sub>sigma</sub> = 0.1097] |
| Data/restraints/parameters                  | 3506/0/217                                                    |
| Goodness-of-fit on F <sup>2</sup>           | 1.043                                                         |
| Final R indexes [I >= 2σ (I)]               | R <sub>1</sub> = 0.0776, wR <sub>2</sub> = 0.1367             |
| Final R indexes [all data]                  | R <sub>1</sub> = 0.1837, wR <sub>2</sub> = 0.1780             |
| Largest diff. peak/hole / e Å <sup>-3</sup> | 0.19/-0.23                                                    |

## Analytic data of the obtained compounds

### (1) 4-phenyl-3-(trifluoromethyl)-4*H*-benzo[*b*][1,4]oxazine (3aa)

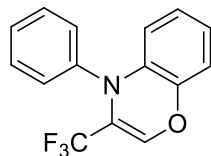

Yellow oil (71.4 mg, 86% yield);  $^1\text{H}$  NMR (400 MHz,  $\text{CDCl}_3$ )  $\delta$  7.48-7.40 (m, 4H), 7.33 (t,  $J = 7.2$  Hz, 1H), 6.77-6.68 (m, 2H), 6.66-6.61 (m, 1H), 6.59 (s, 1H), 6.30 (d,  $J = 7.6$  Hz, 1H).  $^{13}\text{C}$  NMR (101 MHz,  $\text{CDCl}_3$ )  $\delta$  145.78, 144.98, 135.44, 134.30 (q,  $J_{\text{C-F}} = 7.1$  Hz), 130.05, 129.81, 127.92, 124.85, 124.03, 121.26 (q,  $J_{\text{C-F}} = 272.7$  Hz), 119.53 (q,  $J_{\text{C-F}} = 32.3$  Hz), 119.40, 115.99.  $^{19}\text{F}$  NMR (376 MHz,  $\text{CDCl}_3$ )  $\delta$  -65.35; MS (EI,  $m/z$ ): 277 [ $\text{M}$ ] $^+$ . HRMS (ESI): Calcd. for  $\text{C}_{15}\text{H}_{10}\text{F}_3\text{NO}$  [ $\text{M}+\text{H}$ ] $^+$ : 278.0787; found: 278.0786.

### (2) 4-(*p*-tolyl)-3-(trifluoromethyl)-4*H*-benzo[*b*][1,4]oxazine (3ab)

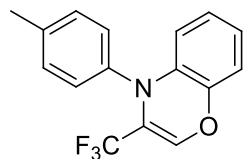

Yellow solid (71.6 mg, 82% yield); m.p: 36-37 °C;  $^1\text{H}$  NMR (400 MHz,  $\text{CDCl}_3$ )  $\delta$  7.33 (d,  $J = 8.0$  Hz, 2H), 7.21 (d,  $J = 8.0$  Hz, 2H), 6.74-6.66 (m, 2H), 6.60 (dd,  $J = 7.6$  Hz, 2.0 Hz, 1H), 6.54 (s, 1H), 6.26 (dd,  $J = 7.6$  Hz, 2.0 Hz, 1H), 2.36 (s, 3H).  $^{13}\text{C}$  NMR (101 MHz,  $\text{CDCl}_3$ )  $\delta$  145.61, 142.06, 137.81, 135.63, 133.73 (q,  $J_{\text{C-F}} = 7.1$  Hz), 130.41, 129.85, 124.76, 123.77, 121.24 (q,  $J_{\text{C-F}} = 272.7$  Hz), 119.59 (q,  $J_{\text{C-F}} = 32.3$  Hz), 119.02, 115.85, 21.17.  $^{19}\text{F}$  NMR (376 MHz,  $\text{CDCl}_3$ )  $\delta$  -65.34; MS (EI,  $m/z$ ): 291 [ $\text{M}$ ] $^+$ . HRMS (ESI): Calcd. for  $\text{C}_{16}\text{H}_{12}\text{F}_3\text{NO}$  [ $\text{M}+\text{H}$ ] $^+$ : 292.0944; found: 292.0940.

### (3) 4-(*m*-tolyl)-3-(trifluoromethyl)-4*H*-benzo[*b*][1,4]oxazine (3ac)

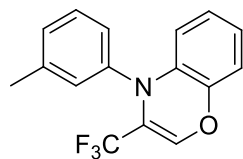

Yellow solid (66.3 mg, 76% yield); m.p: 55-56 °C;  $^1\text{H}$  NMR (400 MHz,  $\text{CDCl}_3$ )  $\delta$  7.32-7.23 (m, 3H), 7.13 (d,  $J = 7.2$  Hz, 1H), 6.76-6.67 (m, 2H), 6.62 (dd,  $J = 7.2$  Hz,

2.0 Hz, 1H), 6.58 (q,  $J = 1.2$  Hz, 1H), 6.31 (dd,  $J = 7.6$  Hz, 2.0 Hz, 1H), 2.36 (s, 3H).  $^{13}\text{C}$  NMR (101 MHz,  $\text{CDCl}_3$ )  $\delta$  145.83, 144.96, 139.80, 135.52, 134.27 (q,  $J_{\text{C-F}} = 7.1$  Hz), 130.43, 129.45, 128.67, 126.96, 124.80, 123.92, 121.25 (q,  $J_{\text{C-F}} = 272.7$  Hz), 119.64 (q,  $J_{\text{C-F}} = 32.3$  Hz), 119.44, 115.92, 21.30.  $^{19}\text{F}$  NMR (376 MHz,  $\text{CDCl}_3$ )  $\delta$  -65.40; MS (EI,  $m/z$ ): 291  $[\text{M}]^+$ . HRMS (ESI): Calcd. for  $\text{C}_{16}\text{H}_{12}\text{F}_3\text{NO}$   $[\text{M}+\text{H}]^+$ : 292.0944; found: 292.0940.

**(4) 4-(*o*-tolyl)-3-(trifluoromethyl)-4*H*-benzo[*b*][1,4]oxazine (3ad)**

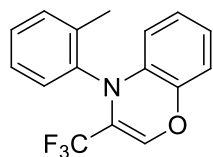

Yellow oil (69.8 mg, 80% yield);  $^1\text{H}$  NMR (400 MHz,  $\text{CDCl}_3$ )  $\delta$  7.39-7.34 (m, 1H), 7.31-7.25 (m, 3H), 6.68-6.59 (m, 2H), 6.54 (dd,  $J = 7.6$  Hz, 1.6 Hz, 1H), 6.37 (s, 1H), 5.92 (dd,  $J = 7.6$  Hz, 1.6 Hz, 1H), 2.45 (s, 3H).  $^{13}\text{C}$  NMR (101 MHz,  $\text{CDCl}_3$ )  $\delta$  144.67, 140.20, 139.06, 134.88, 131.82 (q,  $J_{\text{C-F}} = 7.1$  Hz), 131.80, 131.62, 128.62, 127.32, 124.79, 123.25, 121.07 (q,  $J_{\text{C-F}} = 272.7$  Hz), 118.88 (q,  $J_{\text{C-F}} = 32.3$  Hz), 116.33, 115.69, 17.51.  $^{19}\text{F}$  NMR (376 MHz,  $\text{CDCl}_3$ )  $\delta$  -65.95; MS (EI,  $m/z$ ): 291  $[\text{M}]^+$ . HRMS (ESI): Calcd. for  $\text{C}_{16}\text{H}_{12}\text{F}_3\text{NO}$   $[\text{M}+\text{H}]^+$ : 292.0944; found: 292.0940.

**(5) 4-(4-methoxyphenyl)-3-(trifluoromethyl)-4*H*-benzo[*b*][1,4]oxazine (3ae)**

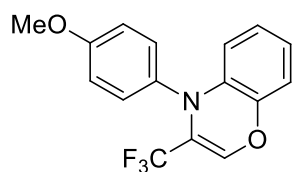

Yellow solid (79.2 mg, 86% yield); m.p: 42-43 °C;  $^1\text{H}$  NMR (400 MHz,  $\text{CDCl}_3$ )  $\delta$  7.36 (d,  $J = 7.2$  Hz, 2H), 6.92 (d,  $J = 8.8$  Hz, 2H), 6.74-6.65 (m, 2H), 6.58 (dd,  $J = 7.2$  Hz, 2.0 Hz, 1H), 6.49 (s, 1H), 6.20 (dd,  $J = 7.2$  Hz, 2.0 Hz, 1H), 3.81 (s, 3H).  $^{13}\text{C}$  NMR (101 MHz,  $\text{CDCl}_3$ )  $\delta$  158.96, 145.35, 136.91, 135.79, 133.13 (q,  $J_{\text{C-F}} = 7.1$  Hz), 131.39, 124.73, 123.62, 121.22 (q,  $J_{\text{C-F}} = 272.7$  Hz), 119.58 (q,  $J_{\text{C-F}} = 32.3$  Hz), 118.60, 115.81, 114.87, 55.42.  $^{19}\text{F}$  NMR (376 MHz,  $\text{CDCl}_3$ )  $\delta$  -65.33; MS (EI,  $m/z$ ): 307  $[\text{M}]^+$ . HRMS (ESI): Calcd. for  $\text{C}_{16}\text{H}_{12}\text{F}_3\text{NO}_2$   $[\text{M}+\text{H}]^+$ : 308.0893; found: 308.0891.

**(6) 4-(4-chlorophenyl)-3-(trifluoromethyl)-4H-benzo[b][1,4]oxazine (3af)**

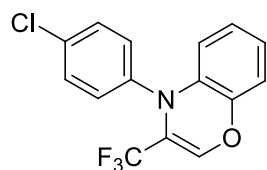

Colourless oil (71.8 mg, 77% yield);  $^1\text{H}$  NMR (400 MHz,  $\text{CDCl}_3$ )  $\delta$  7.45-7.34 (m, 4H), 6.83-6.70 (m, 2H), 6.65 (dd,  $J = 7.6$  Hz, 2.0 Hz, 1H), 6.62 (s, 1H), 6.29 (dd,  $J = 7.6$  Hz, 2.0 Hz, 1H).  $^{13}\text{C}$  NMR (101 MHz,  $\text{CDCl}_3$ )  $\delta$  145.84, 143.72, 134.98, 134.80 (q,  $J_{\text{C-F}} = 7.1$  Hz), 133.67, 131.30, 130.04, 124.94, 124.37, 121.15 (q,  $J_{\text{C-F}} = 272.7$  Hz), 119.50, 119.25 (q,  $J_{\text{C-F}} = 32.3$  Hz), 116.14.  $^{19}\text{F}$  NMR (376 MHz,  $\text{CDCl}_3$ )  $\delta$  -65.38; MS (EI,  $m/z$ ): 311  $[\text{M}]^+$ . HRMS (ESI): Calcd. for  $\text{C}_{15}\text{H}_9\text{ClF}_3\text{NO}$   $[\text{M}+\text{H}]^+$ : 312.0398; found: 312.0393.

**(7) 4-(4-bromophenyl)-3-(trifluoromethyl)-4H-benzo[b][1,4]oxazine (3ag)**

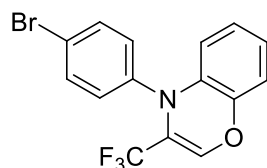

Colourless oil (72.4 mg, 68% yield);  $^1\text{H}$  NMR (400 MHz,  $\text{CDCl}_3$ )  $\delta$  7.57-7.52 (m, 2H), 7.36-7.32 (m, 2H), 6.80-6.72 (m, 2H), 6.65 (dd,  $J = 7.6$  Hz, 2.0 Hz, 1H), 6.63 (s, 1H), 6.30 (dd,  $J = 7.6$  Hz, 2.0 Hz, 1H).  $^{13}\text{C}$  NMR (101 MHz,  $\text{CDCl}_3$ )  $\delta$  144.84, 143.28, 133.89 (q,  $J_{\text{C-F}} = 7.1$  Hz), 131.99, 130.55, 128.71, 123.90, 123.36, 120.64, 120.10 (q,  $J_{\text{C-F}} = 272.7$  Hz), 118.53, 118.31 (q,  $J_{\text{C-F}} = 32.3$  Hz), 115.11.  $^{19}\text{F}$  NMR (376 MHz,  $\text{CDCl}_3$ )  $\delta$  -65.37; MS (EI,  $m/z$ ): 355  $[\text{M}]^+$ . HRMS (ESI): Calcd. for  $\text{C}_{15}\text{H}_9\text{BrF}_3\text{NO}$   $[\text{M}+\text{H}]^+$ : 355.9892; found: 355.9884.

**(8) 3-(trifluoromethyl)-4-(4-(trifluoromethyl)phenyl)-4H-benzo[b][1,4]oxazine**

**(3ah)**

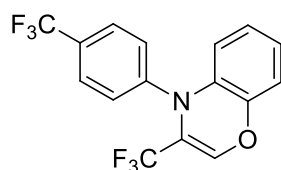

Colourless oil (75.5 mg, 73% yield);  $^1\text{H}$  NMR (400 MHz,  $\text{CDCl}_3$ )  $\delta$  7.68 (d,  $J = 8.4$  Hz, 2H), 7.58 (d,  $J = 8.4$  Hz, 2H), 6.88-6.74 (m, 3H), 6.72 (dd,  $J = 8.0$  Hz, 1.6 Hz, 1H), 6.44 (dd,  $J = 8.0$  Hz, 1.6 Hz, 1H).  $^{13}\text{C}$  NMR (101 MHz,  $\text{CDCl}_3$ )  $\delta$  149.05, 146.62, 136.60 (q,  $J_{\text{C-F}} = 7.1$  Hz), 134.53, 129.61 (q,  $J_{\text{C-F}} = 32.3$  Hz), 129.46, 126.94 (q,  $J_{\text{C-F}} = 4.0$  Hz), 125.08, 124.94, 123.84 (q,  $J_{\text{C-F}} = 272.7$  Hz), 120.41, 119.19 (q,  $J_{\text{C-F}} = 32.3$  Hz), 116.39.  $^{19}\text{F}$  NMR (376 MHz,  $\text{CDCl}_3$ )  $\delta$  -62.47, -65.37; MS (EI,  $m/z$ ): 345  $[\text{M}]^+$ . HRMS (ESI): Calcd. for  $\text{C}_{16}\text{H}_9\text{F}_6\text{NO}$   $[\text{M}+\text{H}]^+$ : 346.0661; found: 346.0659.

**(9) 4-(3-(trifluoromethyl)-4H-benzo[b][1,4]oxazin-4-yl)benzonitrile (3ai)**

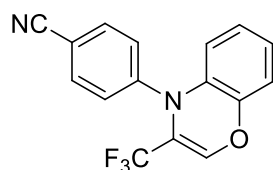

Yellow oil (52.5 mg, 58% yield);  $^1\text{H}$  NMR (400 MHz,  $\text{CDCl}_3$ )  $\delta$  7.70 (d,  $J = 8.4$  Hz, 2H), 7.55 (d,  $J = 8.4$  Hz, 2H), 6.96-6.83 (m, 3H), 6.78 (d,  $J = 8.0$  Hz, 1H), 6.57 (t,  $J = 7.6$  Hz, 1H).  $^{13}\text{C}$  NMR (101 MHz,  $\text{CDCl}_3$ )  $\delta$  150.46, 147.50, 138.59 (q,  $J_{\text{C-F}} = 7.1$  Hz), 133.99, 133.72, 128.59, 125.55, 125.23, 121.26, 121.10 (q,  $J_{\text{C-F}} = 272.7$  Hz), 119.02 (q,  $J_{\text{C-F}} = 32.3$  Hz), 118.26, 116.66, 110.80.  $^{19}\text{F}$  NMR (376 MHz,  $\text{CDCl}_3$ )  $\delta$  -65.23; MS (EI,  $m/z$ ): 302  $[\text{M}]^+$ . HRMS (ESI): Calcd. for  $\text{C}_{16}\text{H}_9\text{F}_3\text{N}_2\text{O}$   $[\text{M}+\text{H}]^+$ : 303.0740; found: 303.0736.

**(10) 4-(3-nitrophenyl)-3-(trifluoromethyl)-4H-benzo[b][1,4]oxazine (3aj)**

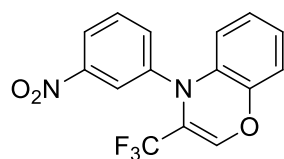

Red brown oil (69.5 mg, 72% yield);  $^1\text{H}$  NMR (400 MHz,  $\text{CDCl}_3$ )  $\delta$  8.34 (t,  $J = 2.0$  Hz, 1H), 8.19 (dd,  $J = 8.4$  Hz, 2.4 Hz, 1H), 7.83 (d,  $J = 8.0$  Hz, 1H), 7.61 (t,  $J = 8.0$  Hz, 1H), 6.92-6.80 (m, 3H), 6.76 (dd,  $J = 7.6$  Hz, 2.0 Hz, 1H), 6.47 (dd,  $J = 7.6$  Hz, 2.0 Hz, 1H).  $^{13}\text{C}$  NMR (101 MHz,  $\text{CDCl}_3$ )  $\delta$  148.16, 146.34, 145.61, 136.17 (q,  $J_{\text{C-F}} = 7.1$  Hz), 134.46, 133.08, 129.53, 124.29, 124.21, 123.23, 121.53, 120.06 (q,  $J_{\text{C-F}} = 272.7$  Hz), 119.55, 117.79 (q,  $J_{\text{C-F}} = 33.3$  Hz), 115.59.  $^{19}\text{F}$  NMR (376 MHz,  $\text{CDCl}_3$ )  $\delta$  -

65.40; MS (EI, m/z): 322 [M]<sup>+</sup>. HRMS (ESI): Calcd. for C<sub>15</sub>H<sub>9</sub>F<sub>3</sub>N<sub>2</sub>O<sub>3</sub> [M+H]<sup>+</sup>: 323.0638; found: 323.0632.

**(11) 4-(3,4-dimethoxyphenyl)-3-(trifluoromethyl)-4H-benzo[b][1,4]oxazine (3ak)**

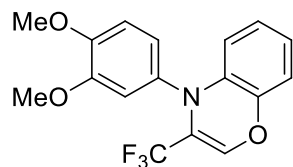

Yellow solid (81.9 mg, 81% yield); m.p: 102-103 °C; <sup>1</sup>H NMR (400 MHz, CDCl<sub>3</sub>) δ 7.00 (dd, *J* = 8.4 Hz, 2.4 Hz, 1H), 6.95 (d, *J* = 2.4 Hz, 1H), 6.87 (d, *J* = 8.4 Hz, 1H), 6.75-6.66 (m, 2H), 6.59 (dd, *J* = 7.2 Hz, 2.4 Hz, 1H), 6.50 (s, 1H), 6.25 (dd, *J* = 8.4 Hz, 2.4 Hz, 1H), 3.89 (s, 3H), 3.87 (s, 3H). <sup>13</sup>C NMR (101 MHz, CDCl<sub>3</sub>) δ 149.75, 148.71, 145.25, 136.97, 135.61, 133.17 (q, *J*<sub>C-F</sub> = 7.1 Hz), 124.77, 123.70, 122.69, 121.23 (q, *J*<sub>C-F</sub> = 272.7 Hz), 119.51 (q, *J*<sub>C-F</sub> = 32.3 Hz), 118.56, 115.84, 113.01, 111.25, 56.05, 55.93. <sup>19</sup>F NMR (376 MHz, CDCl<sub>3</sub>) δ -65.35; MS (EI, m/z): 337 [M]<sup>+</sup>. HRMS (ESI): Calcd. for C<sub>17</sub>H<sub>14</sub>F<sub>3</sub>NO<sub>3</sub> [M+H]<sup>+</sup>: 338.0999; found: 338.0994.

**(12) 4-(benzo[d][1,3]dioxol-5-yl)-3-(trifluoromethyl)-4H-benzo[b][1,4]oxazine (3al)**

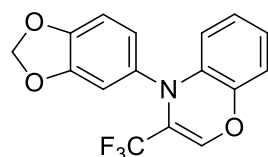

Yellow oil (75.1 mg, 78% yield); m.p: 58-60 °C; <sup>1</sup>H NMR (400 MHz, CDCl<sub>3</sub>) δ 6.97-6.90 (m, 2H), 6.83-6.78 (m, 1H), 6.77-6.68 (m, 2H), 6.64-6.57 (m, 1H), 6.53 (s, 1H), 6.34-6.27 (m, 1H), 5.99 (s, 2H), 3.87 (s, 3H). <sup>13</sup>C NMR (101 MHz, CDCl<sub>3</sub>) δ 148.50, 147.19, 145.48, 138.63, 135.46, 133.77 (q, *J*<sub>C-F</sub> = 7.1 Hz), 124.81, 123.94, 123.91, 121.79 (q, *J*<sub>C-F</sub> = 272.7 Hz), 119.45 (q, *J*<sub>C-F</sub> = 32.3 Hz), 119.11, 115.93, 110.68, 108.57, 101.76. <sup>19</sup>F NMR (376 MHz, CDCl<sub>3</sub>) δ -65.43; MS (EI, m/z): 321 [M]<sup>+</sup>. HRMS (ESI): Calcd. for C<sub>16</sub>H<sub>10</sub>F<sub>3</sub>NO<sub>3</sub> [M+H]<sup>+</sup>: 322.0686; found: 322.0683.

**(13) 4-(pyridin-3-yl)-3-(trifluoromethyl)-4H-benzo[b][1,4]oxazine (3am)**

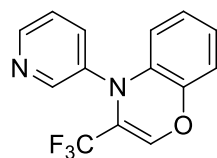

Yellow oil (38.4 mg, 46% yield);  $^1\text{H}$  NMR (400 MHz,  $\text{CDCl}_3$ )  $\delta$  8.74 (s, 1H), 8.59 (s, 1H), 7.82 (d,  $J = 8.0$  Hz, 1H), 7.39 (dd,  $J = 8.0$  Hz, 4.8 Hz, 1H), 6.87-6.74 (m, 2H), 6.74-6.65 (m, 2H), 6.33 (d,  $J = 7.6$  Hz, 1H).  $^{13}\text{C}$  NMR (101 MHz,  $\text{CDCl}_3$ )  $\delta$  151.37, 148.67, 146.11, 141.77, 137.34, 135.66 (q,  $J_{\text{C-F}} = 7.1$  Hz), 134.54, 125.13, 124.81, 124.46, 121.07 (q,  $J_{\text{C-F}} = 272.7$  Hz), 119.66, 118.94 (q,  $J_{\text{C-F}} = 32.3$  Hz), 116.36.  $^{19}\text{F}$  NMR (376 MHz,  $\text{CDCl}_3$ )  $\delta$  -65.36; MS (EI,  $m/z$ ): 278  $[\text{M}]^+$ . HRMS (ESI): Calcd. for  $\text{C}_{14}\text{H}_9\text{F}_3\text{N}_2\text{O}$   $[\text{M}+\text{H}]^+$ : 279.0740; found: 279.0736.

**(14) 4-(naphthalen-1-yl)-3-(trifluoromethyl)-4H-benzo[b][1,4]oxazine (3an)**

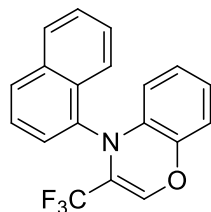

Yellow oil (63.7 mg, 65% yield);  $^1\text{H}$  NMR (400 MHz,  $\text{CDCl}_3$ )  $\delta$  8.47 (d,  $J = 8.4$  Hz, 1H), 7.88 (t,  $J = 9.2$  Hz, 2H), 7.66 (d,  $J = 7.2$  Hz, 1H), 7.60-7.48 (m, 3H), 6.72-6.60 (m, 2H), 6.58-6.48 (m, 2H), 6.01 (d,  $J = 8.0$  Hz, 1H).  $^{13}\text{C}$  NMR (101 MHz,  $\text{CDCl}_3$ )  $\delta$  145.01, 139.45, 135.70, 134.95, 132.96 (q,  $J_{\text{C-F}} = 7.1$  Hz), 132.71, 129.18, 128.96, 128.47, 127.20, 126.52, 126.03, 124.87, 123.70, 123.36, 121.15 (q,  $J_{\text{C-F}} = 272.7$  Hz), 119.97 (q,  $J_{\text{C-F}} = 32.3$  Hz), 117.33, 115.91.  $^{19}\text{F}$  NMR (376 MHz,  $\text{CDCl}_3$ )  $\delta$  -65.62; MS (EI,  $m/z$ ): 327  $[\text{M}]^+$ . HRMS (ESI): Calcd. for  $\text{C}_{19}\text{H}_{12}\text{F}_3\text{NO}$   $[\text{M}+\text{H}]^+$ : 328.0944; found: 328.0940.

**(15) 4-hexyl-3-(trifluoromethyl)-4H-benzo[b][1,4]oxazine (3ao)**

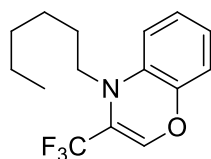

Colourless oil (60.7 mg, 71% yield);  $^1\text{H}$  NMR (400 MHz,  $\text{CDCl}_3$ )  $\delta$  6.90-6.85 (m, 1H), 6.79-6.74 (m, 1H), 6.68 (dd,  $J = 8.0$  Hz, 1.2 Hz, 1H), 6.61-6.52 (m, 2H), 3.24 (t,  $J = 8.0$  Hz, 2H), 1.68 (p,  $J = 7.6$  Hz, 2H), 1.31-1.24 (m, 6H), 0.86 (t,  $J = 6.8$  Hz, 3H).  $^{13}\text{C}$  NMR (101 MHz,  $\text{CDCl}_3$ )  $\delta$  148.02, 136.23 (q,  $J_{\text{C-F}} = 7.1$  Hz), 134.92, 124.99, 123.65, 121.75 (q,  $J_{\text{C-F}} = 272.7$  Hz), 118.97 (q,  $J_{\text{C-F}} = 32.3$  Hz), 118.49, 115.81, 52.20, 31.49, 26.45, 26.33, 22.58, 13.96.  $^{19}\text{F}$  NMR (376 MHz,  $\text{CDCl}_3$ )  $\delta$  -65.95; MS (EI,  $m/z$ ): 285  $[\text{M}]^+$ . HRMS (ESI): Calcd. for  $\text{C}_{15}\text{H}_{18}\text{F}_3\text{NO}$   $[\text{M}+\text{H}]^+$ : 286.1413; found: 286.1409.

**(16) 6-methyl-4-phenyl-3-(trifluoromethyl)-4H-benzo[b][1,4]oxazine (3ba)**

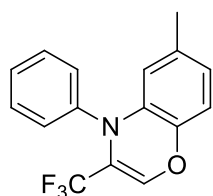

Yellow solid (70.7 mg, 81% yield), m.p: 141-142 °C;  $^1\text{H}$  NMR (400 MHz,  $\text{CDCl}_3$ )  $\delta$  7.49-7.38 (m, 4H), 7.33 (t,  $J = 7.2$  Hz, 1H), 6.61 (s, 1H), 6.58-6.51 (m, 2H), 6.13 (s, 1H), 2.04 (s, 3H).  $^{13}\text{C}$  NMR (101 MHz,  $\text{CDCl}_3$ )  $\delta$  145.27, 143.69, 134.93, 134.60 (q,  $J_{\text{C-F}} = 7.1$  Hz), 134.55, 129.96, 129.73, 127.79, 124.33, 121.34 (q,  $J_{\text{C-F}} = 272.7$  Hz), 120.13, 119.37 (q,  $J_{\text{C-F}} = 32.3$  Hz), 115.65, 20.74.  $^{19}\text{F}$  NMR (376 MHz,  $\text{CDCl}_3$ )  $\delta$  -65.33; MS (EI,  $m/z$ ): 291  $[\text{M}]^+$ . HRMS (ESI): Calcd. for  $\text{C}_{16}\text{H}_{12}\text{F}_3\text{NO}$   $[\text{M}+\text{H}]^+$ : 292.0944; found: 292.0939.

**(17) 6-methoxy-4-phenyl-3-(trifluoromethyl)-4H-benzo[b][1,4]oxazine (3ca)**

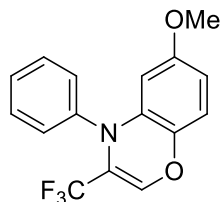

Yellow oil (76.4 mg, 83% yield);  $^1\text{H}$  NMR (400 MHz,  $\text{CDCl}_3$ )  $\delta$  7.46-7.39 (m, 4H), 7.36-7.30 (m, 1H), 6.59-6.53 (m, 2H), 6.25 (dd,  $J = 8.4$  Hz, 2.8 Hz, 1H), 5.84 (d,  $J = 2.8$  Hz, 1H), 3.58 (s, 3H).  $^{13}\text{C}$  NMR (101 MHz,  $\text{CDCl}_3$ )  $\delta$  156.62, 144.37, 139.45, 136.11, 134.13 (q,  $J_{\text{C-F}} = 7.1$  Hz), 130.03, 129.78, 128.00, 121.33 (q,  $J_{\text{C-F}} = 272.7$  Hz), 118.49 (q,  $J_{\text{C-F}} = 32.3$  Hz), 116.04, 107.08, 106.05, 55.45.  $^{19}\text{F}$  NMR (376 MHz,  $\text{CDCl}_3$ )



$\delta$  -65.11; MS (EI, m/z): 307 [M]<sup>+</sup>. HRMS (ESI): Calcd. for C<sub>16</sub>H<sub>12</sub>F<sub>3</sub>NO<sub>2</sub> [M+H]<sup>+</sup>: 308.0893; found: 308.0889.

**(18) 6-chloro-4-phenyl-3-(trifluoromethyl)-4H-benzo[b][1,4]oxazine (3da)**

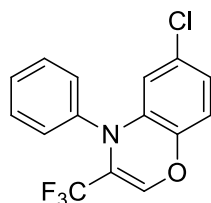

White solid (72.8, 78% yield) m.p: 60-61 °C; <sup>1</sup>H NMR (400 MHz, CDCl<sub>3</sub>)  $\delta$  7.49-7.36 (s, 5H), 6.72-6.65 (m, 1H), 6.56-6.49 (m, 2H), 6.23-6.13 (m, 1H), 6.80 (t, *J* = 2.8 Hz, 1H), 6.75 (t, *J* = 2.8 Hz, 1H), 6.38 (dd, *J* = 3.5, 1.6 Hz, 1H). <sup>13</sup>C NMR (101 MHz, CDCl<sub>3</sub>)  $\delta$  144.08, 143.42, 136.57, 133.56 (q, *J*<sub>C-F</sub> = 7.1 Hz), 130.15, 130.08, 129.63, 128.47, 123.43, 121.01 (q, *J*<sub>C-F</sub> = 272.7 Hz), 119.17 (q, *J*<sub>C-F</sub> = 32.3 Hz), 118.59, 116.79. <sup>19</sup>F NMR (376 MHz, CDCl<sub>3</sub>)  $\delta$  -65.22; MS (EI, m/z): 311 [M]<sup>+</sup>. HRMS (ESI): Calcd. for C<sub>15</sub>H<sub>9</sub>ClF<sub>3</sub>NO [M+H]<sup>+</sup>: 312.0398; found: 312.0395.

**(19) 4-phenyl-3-(trifluoromethyl)-4H-benzo[b][1,4]oxazine-6-carbonitrile (3ea)**

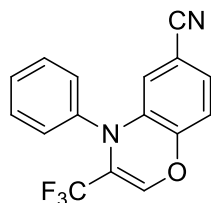

Yellow solid, 62% yield, m.p: 95-96 °C; <sup>1</sup>H NMR (400 MHz, CDCl<sub>3</sub>)  $\delta$  7.53-7.46 (m, 2H), 7.45-7.38 (m, 3H), 7.00 (dd, *J* = 8.0 Hz, 1.6 Hz, 1H), 6.60 (d, *J* = 8.0 Hz, 1H), 6.43 (s, 1H), 6.30 (d, *J* = 1.6 Hz, 1H). <sup>13</sup>C NMR (101 MHz, CDCl<sub>3</sub>)  $\delta$  148.81, 141.89, 136.80, 132.23 (q, *J*<sub>C-F</sub> = 7.1 Hz), 130.41, 130.24, 129.02, 128.51, 120.58, 120.57 (q, *J*<sub>C-F</sub> = 272.7 Hz), 119.79 (q, *J*<sub>C-F</sub> = 32.3 Hz), 118.18, 116.61, 108.41. <sup>19</sup>F NMR (376 MHz, CDCl<sub>3</sub>)  $\delta$  -65.31; MS (EI, m/z): 302 [M]<sup>+</sup>. HRMS (ESI): Calcd. for C<sub>16</sub>H<sub>9</sub>F<sub>3</sub>N<sub>2</sub>O [M+H]<sup>+</sup>: 303.0740; found: 303.0736.

**(20) 4-phenyl-3,6-bis(trifluoromethyl)-4*H*-benzo[*b*][1,4]oxazine (3fa)**

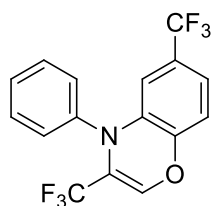

Yellow oil (77.6 mg, 75% yield); <sup>1</sup>H NMR (400 MHz, CDCl<sub>3</sub>) δ 7.49-7.43 (m, 4H), 7.42-7.36 (m, 1H), 6.98 (d, *J* = 8.4 Hz, 1H), 6.66 (d, *J* = 8.0 Hz, 1H), 6.51 (s, 1H), 6.39 (d, *J* = 2.4 Hz, 1H). <sup>13</sup>C NMR (101 MHz, CDCl<sub>3</sub>) δ 148.06, 143.09, 136.20, 133.24 (q, *J*<sub>C-F</sub> = 7.1 Hz), 130.17, 130.11, 128.62, 127.23 (q, *J*<sub>C-F</sub> = 32.3 Hz), 123.43 (q, *J*<sub>C-F</sub> = 272.7 Hz), 120.81 (q, *J*<sub>C-F</sub> = 272.7 Hz), 121.16 (q, *J*<sub>C-F</sub> = 1.6 Hz), 119.81 (q, *J*<sub>C-F</sub> = 32.3 Hz), 116.11, 115.34 (q, *J*<sub>C-F</sub> = 1.6 Hz). <sup>19</sup>F NMR (376 MHz, CDCl<sub>3</sub>) δ -62.81, -65.39; MS (EI, *m/z*): 345 [M]<sup>+</sup>. HRMS (ESI): Calcd. for C<sub>16</sub>H<sub>9</sub>F<sub>6</sub>NO [M+H]<sup>+</sup>: 346.0661; found: 346.0657.

**(21) 1-phenyl-2-(trifluoromethyl)-1*H*-naphtho[2,1-*b*][1,4]oxazine (3ga)**

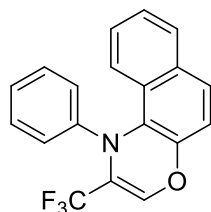

Yellow solid (70.6 mg, 72% yield) m.p: 115-116 °C; <sup>1</sup>H NMR (400 MHz, CDCl<sub>3</sub>) δ 8.05 (d, *J* = 8.0 Hz, 1H), 7.72 (d, *J* = 8.0 Hz, 1H), 7.61 (d, *J* = 8.0 Hz, 1H), 7.44 (d, *J* = 8.0 Hz, 2H), 7.39-7.31 (m, 2H), 7.29-7.23 (m, 3H), 7.19-7.10 (m, 2H). <sup>13</sup>C NMR (101 MHz, CDCl<sub>3</sub>) δ 150.11, 148.89, 143.56 (q, *J*<sub>C-F</sub> = 6.1 Hz), 132.15, 129.31, 128.73, 128.04, 127.99, 127.05, 126.82, 126.49, 126.07, 125.21, 122.84, 122.76 (q, *J*<sub>C-F</sub> = 34.3 Hz), 121.94 (q, *J*<sub>C-F</sub> = 272.7 Hz), 116.63. <sup>19</sup>F NMR (376 MHz, CDCl<sub>3</sub>) δ -65.49; MS (EI, *m/z*): 327 [M]<sup>+</sup>. HRMS (ESI): Calcd. for C<sub>19</sub>H<sub>12</sub>F<sub>3</sub>NO [M+H]<sup>+</sup>: 328.0944; found: 328.0940.

**(22) 4-phenyl-3-(trifluoromethyl)-4H-pyrido[3,2-b][1,4]oxazine (3ha)**

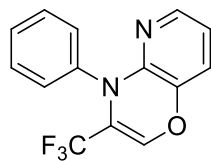

Yellow oil (58.4 mg, 70% yield);  $^1\text{H}$  NMR (400 MHz,  $\text{CDCl}_3$ )  $\delta$  7.54 (dd,  $J = 5.2$  Hz, 2.0 Hz, 1H), 7.40-7.33 (m, 4H), 7.30-7.24 (m, 1H), 6.69 (dd,  $J = 8.0$  Hz, 1.6 Hz, 1H), 6.52 (dd,  $J = 8.0$  Hz, 4.8 Hz, 1H), 6.37-6.32 (m, 1H).  $^{13}\text{C}$  NMR (101 MHz,  $\text{CDCl}_3$ )  $\delta$  146.81, 142.11, 140.49, 139.37, 131.47 (q,  $J_{\text{C-F}} = 7.1$  Hz), 129.24, 128.28, 127.07, 121.07, 119.66 (q,  $J_{\text{C-F}} = 272.7$  Hz), 118.81 (q,  $J_{\text{C-F}} = 32.3$  Hz), 118.06.  $^{19}\text{F}$  NMR (376 MHz,  $\text{CDCl}_3$ )  $\delta$  -64.43; MS (EI,  $m/z$ ): 278  $[\text{M}]^+$ . HRMS (ESI): Calcd. for  $\text{C}_{14}\text{H}_9\text{F}_3\text{N}_2\text{O}$   $[\text{M}+\text{H}]^+$ : 279.0740; found: 279.0737.

**(23) 4-(p-tolyl)-3,6-bis(trifluoromethyl)-4H-benzo[b][1,4]oxazine (3fb)**

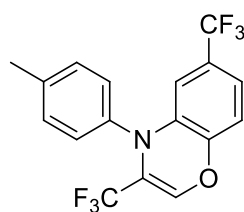

Colourless oil (81.8 mg, 76% yield);  $^1\text{H}$  NMR (400 MHz,  $\text{CDCl}_3$ )  $\delta$  7.31 (d,  $J = 8.0$  Hz, 2H), 7.25 (d,  $J = 8.0$  Hz, 2H), 6.96 (d,  $J = 8.4$  Hz, 1H), 6.63 (d,  $J = 8.4$  Hz, 1H), 6.46 (s, 1H), 6.35 (s, 1H), 2.39 (s, 3H).  $^{13}\text{C}$  NMR (101 MHz,  $\text{CDCl}_3$ )  $\delta$  147.92, 140.08, 138.62, 136.40, 132.74 (q,  $J_{\text{C-F}} = 7.1$  Hz), 130.82, 129.89, 127.14 (q,  $J_{\text{C-F}} = 33.3$  Hz), 123.47 (q,  $J_{\text{C-F}} = 272.7$  Hz), 120.93 (q,  $J_{\text{C-F}} = 4.0$  Hz), 120.82 (q,  $J_{\text{C-F}} = 272.7$  Hz), 119.83 (q,  $J_{\text{C-F}} = 32.3$  Hz), 115.99, 114.97 (q,  $J_{\text{C-F}} = 4.0$  Hz), 21.23.  $^{19}\text{F}$  NMR (376 MHz,  $\text{CDCl}_3$ )  $\delta$  -62.80, -65.33; MS (EI,  $m/z$ ): 359  $[\text{M}]^+$ . HRMS (ESI): Calcd. for  $\text{C}_{17}\text{H}_{11}\text{F}_6\text{NO}$   $[\text{M}+\text{H}]^+$ : 360.0818; found: 360.0814.

**(24) 4-(4-methoxyphenyl)-6-methyl-3-(trifluoromethyl)-4*H*-benzo[*b*][1,4]oxazine**

**(3be)**

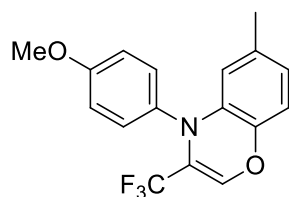

Yellow oil (80.9 mg, 84% yield); <sup>1</sup>H NMR (400 MHz, CDCl<sub>3</sub>) δ 7.35 (d, *J* = 8.8 Hz, 2H), 6.92 (d, *J* = 8.4 Hz, 2H), 6.56-6.45 (m, 3H), 6.03 (s, 1H), 3.81 (s, 3H), 2.03 (s, 3H). <sup>13</sup>C NMR (101 MHz, CDCl<sub>3</sub>) δ 158.91, 143.22, 137.19, 135.28, 134.46, 133.40 (q, *J*<sub>C-F</sub> = 7.1 Hz), 131.37, 123.93, 121.36 (q, *J*<sub>C-F</sub> = 272.7 Hz), 119.38, 119.35 (q, *J*<sub>C-F</sub> = 32.3 Hz), 115.52, 114.84, 55.39, 20.76. <sup>19</sup>F NMR (376 MHz, CDCl<sub>3</sub>) δ -65.26; MS (EI, *m/z*): 321 [M]<sup>+</sup>. HRMS (ESI): Calcd. for C<sub>17</sub>H<sub>14</sub>F<sub>3</sub>NO<sub>2</sub> [M+H]<sup>+</sup>: 322.1049; found: 322.1048.

**(25) 4-(4-chlorophenyl)-6-methyl-3-(trifluoromethyl)-4*H*-benzo[*b*][1,4]oxazine**

**(3bf)**

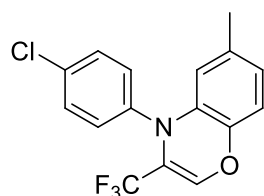

Yellow oil (74.1 mg, 76% yield); <sup>1</sup>H NMR (400 MHz, CDCl<sub>3</sub>) δ 7.39 (s, 4H), 6.63 (d, *J* = 1.2 Hz, 1H), 6.60-6.53 (m, 2H), 6.11 (d, *J* = 1.2 Hz, 1H), 2.07 (s, 3H). <sup>13</sup>C NMR (101 MHz, CDCl<sub>3</sub>) δ 143.99, 143.67, 135.03 (q, *J*<sub>C-F</sub> = 7.1 Hz), 134.72, 133.55, 131.29, 130.01, 124.67, 121.25 (q, *J*<sub>C-F</sub> = 272.7 Hz), 120.21, 119.01 (q, *J*<sub>C-F</sub> = 32.3 Hz), 115.82, 20.75. <sup>19</sup>F NMR (376 MHz, CDCl<sub>3</sub>) δ -65.32; MS (EI, *m/z*): 325 [M]<sup>+</sup>. HRMS (ESI): Calcd. for C<sub>16</sub>H<sub>17</sub>ClF<sub>3</sub>NO [M+H]<sup>+</sup>: 326.0554; found: 326.0552.

**(26) 4,9-diphenyl-3,8-bis(trifluoromethyl)-4,9-dihydrobenzo[1,2-b:4,5-b']bis([1,4]oxazine) (3ia)**

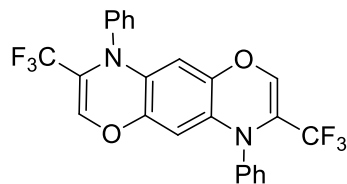

Yellow solid (98.5 mg, 69% yield); m.p: 180-181 °C; <sup>1</sup>H NMR (400 MHz, CDCl<sub>3</sub>) δ 7.45-7.37 (m, 8H), 7.36-7.32 (m, 2H), 6.47 (s, 2H), 5.70 (s, 2H). <sup>13</sup>C NMR (101 MHz, CDCl<sub>3</sub>) δ 144.79, 141.95, 133.95 (q, *J*<sub>C-F</sub> = 7.1 Hz), 130.88, 129.86, 129.60, 128.07, 120.97 (q, *J*<sub>C-F</sub> = 272.7 Hz), 118.71 (q, *J*<sub>C-F</sub> = 32.3 Hz), 107.48. <sup>19</sup>F NMR (376 MHz, CDCl<sub>3</sub>) δ -65.43; HRMS (ESI): Calcd. for C<sub>24</sub>H<sub>14</sub>F<sub>6</sub>N<sub>2</sub>O<sub>2</sub> [M+H]<sup>+</sup>: 477.1032; found: 477.1032.

**(27) 1-phenyl-2-(trifluoromethyl)-1*H*-benzo[*b*][1,4]thiazine (3ja)**

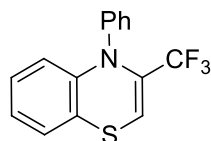

Yellow oil (59.6 mg, 68% yield); <sup>1</sup>H NMR (400 MHz, CDCl<sub>3</sub>) δ 7.37-7.30 (m, 4H), 7.22-7.17 (m, 1H), 7.15-7.11 (m, 1H), 7.09-7.05 (m, 1H), 7.05-6.97 (m, 2H), 6.77 (s, 1H). <sup>13</sup>C NMR (101 MHz, CDCl<sub>3</sub>) δ 144.65, 143.38, 132.62 (q, *J*<sub>C-F</sub> = 33.3 Hz), 129.38, 128.20, 127.90, 127.28, 125.78, 125.44, 125.15, 124.11, 120.08 (q, *J*<sub>C-F</sub> = 275.7 Hz), 119.13 (q, *J*<sub>C-F</sub> = 4.04 Hz). <sup>19</sup>F NMR (376 MHz, CDCl<sub>3</sub>) δ -64.86; MS (EI, m/z): 293 [M]<sup>+</sup>. HRMS (ESI): Calcd. for C<sub>15</sub>H<sub>10</sub>F<sub>3</sub>NS [M+H]<sup>+</sup>: 294.0559; found: 294.0556. The compound was purified by preparative TLC on silica, eluting with mixed solvent (petroleum ether: ethyl acetate = 10: 1) to give the desired product.

**(28) 4-phenyl-2-(trifluoromethyl)-4*H*-naphtho[1,2-*b*][1,4]oxazine (3ka)**

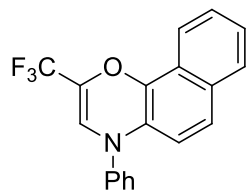

Yellow solid (73.6 mg, 75% yield); m.p: 54-55 °C;  $^1\text{H}$  NMR (400 MHz,  $\text{CDCl}_3$ )  $\delta$  7.90 (d,  $J = 8.4$  Hz, 1H), 7.62 (d,  $J = 8.0$  Hz, 1H), 7.59-7.52 (m, 2H), 7.47-7.38 (m, 3H), 7.37-7.26 (m, 3H), 6.91 (d,  $J = 1.2$  Hz, 1H), 6.67 (d,  $J = 8.8$  Hz, 1H).  $^{13}\text{C}$  NMR (101 MHz,  $\text{CDCl}_3$ )  $\delta$  147.05, 140.11, 136.60 (q,  $J_{\text{C-F}} = 7.1$  Hz), 131.18, 130.42, 129.81, 129.78, 127.74, 127.51, 126.66, 125.44, 124.40, 123.67, 121.42 (q,  $J_{\text{C-F}} = 273.7$  Hz), 120.51 (q,  $J_{\text{C-F}} = 32.3$  Hz), 120.37, 120.28.  $^{19}\text{F}$  NMR (376 MHz,  $\text{CDCl}_3$ )  $\delta$  -65.82; MS (EI, m/z): 327  $[\text{M}]^+$ . HRMS (ESI): Calcd. for  $\text{C}_{19}\text{H}_{12}\text{F}_3\text{NO}$   $[\text{M}+\text{H}]^+$ : 328.0944; found: 328.0938.

**(29) 8-methyl-4-phenyl-3-(trifluoromethyl)-4H-benzo[*b*][1,4]oxazine (3la)**

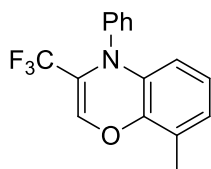

White solid (58.5 mg, 67% yield); m.p: 33-34 °C;  $^1\text{H}$  NMR (400 MHz,  $\text{CDCl}_3$ )  $\delta$  7.51-7.37 (m, 4H), 7.36-7.28 (m, 1H), 6.67 (s, 1H), 6.65-6.56 (m, 2H), 6.26-6.11 (m, 1H), 2.11 (s, 3H).  $^{13}\text{C}$  NMR (101 MHz,  $\text{CDCl}_3$ )  $\delta$  145.55, 144.23, 135.15, 134.70 (q,  $J_{\text{C-F}} = 7.1$  Hz), 129.80, 129.66, 127.66, 125.89, 125.56, 123.94, 121.30 (q,  $J_{\text{C-F}} = 273.7$  Hz), 119.55 (q,  $J_{\text{C-F}} = 32.3$  Hz), 117.41, 15.25.  $^{19}\text{F}$  NMR (376 MHz,  $\text{CDCl}_3$ )  $\delta$  -65.49; MS (EI, m/z): 291  $[\text{M}]^+$ . HRMS (ESI): Calcd. for  $\text{C}_{16}\text{H}_{12}\text{F}_3\text{NO}$   $[\text{M}+\text{H}]^+$ : 292.0944; found: 282.0938.

**(30) 1-phenyl-2-(trifluoromethyl)-2,3-dihydro-1H-benzo[*b*][1,4]oxazine (4a)**

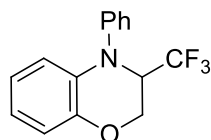

Yellow oil (51.9 mg, 93% yield);  $^1\text{H}$  NMR (400 MHz,  $\text{CDCl}_3$ )  $\delta$  7.42-7.35 (m, 2H), 7.35-7.28 (m, 2H), 7.23-7.17 (m, 1H), 6.97-6.90 (m, 1H), 6.85-6.73 (m, 3H), 4.68-4.61 (m, 1H), 4.11-4.02 (m, 2H).  $^{13}\text{C}$  NMR (101 MHz,  $\text{CDCl}_3$ )  $\delta$  146.60, 143.18, 129.37, 128.86, 124.50, 124.18, 123.72 (q,  $J_{\text{C-F}} = 284.8$  Hz), 120.63, 119.86, 117.80,

116.23, 59.43 (q,  $J_{C-F} = 3.0$  Hz), 59.19 (q,  $J_{C-F} = 30.3$  Hz).  $^{19}\text{F}$  NMR (376 MHz,  $\text{CDCl}_3$ )  $\delta$  -72.42; MS (EI, m/z): 279  $[\text{M}]^+$ . HRMS (ESI): Calcd. for  $\text{C}_{15}\text{H}_{12}\text{F}_3\text{NO}$   $[\text{M}+\text{H}]^+$ : 280.0944; found: 280.0942.

**(31) 4-phenyl-2,3-bis(trifluoromethyl)-4H-benzo[b][1,4]oxazine (5a)**

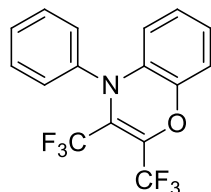

Yellow oil (46.9 mg, 68% yield);  $^1\text{H}$  NMR (400 MHz,  $\text{CDCl}_3$ )  $\delta$  7.51 (d,  $J = 7.6$  Hz, 2H), 7.41 (d,  $J = 7.6$  Hz, 2H), 7.30 (d,  $J = 7.2$  Hz, 1H), 6.98-6.81 (m, 4H), 2.20 (s, 3H).  $^{13}\text{C}$  NMR (101 MHz,  $\text{CDCl}_3$ )  $\delta$  147.74, 144.87, 138.32 (qq,  $J_{C-F} = 39.4$  Hz, 2.0 Hz), 133.02, 128.74, 126.58, 126.50, 124.67, 122.23 (qq,  $J_{C-F} = 37.4$  Hz, 2.0 Hz), 120.28, 118.96 (q,  $J_{C-F} = 275.7$  Hz), 117.65 (q,  $J_{C-F} = 273.7$  Hz), 115.29.  $^{19}\text{F}$  NMR (376 MHz,  $\text{CDCl}_3$ )  $\delta$  -59.13, -66.13; MS (EI, m/z): 345  $[\text{M}]^+$ . HRMS (ESI): Calcd. for  $\text{C}_{16}\text{H}_9\text{F}_6\text{NO}$   $[\text{M}+\text{e}]$ : 345.0594; found: 345.0590.

**(32) ethyl 1-phenyl-2-(trifluoromethyl)-1H-benzo[b][1,4]oxazine-3-carboxylate (6a)**

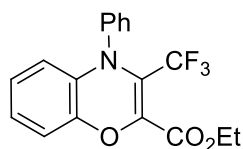

Colorless oil (37.0 mg, 53% yield);  $^1\text{H}$  NMR (400 MHz,  $\text{CDCl}_3$ )  $\delta$  7.54-7.49 (m, 2H), 7.45-7.39 (m, 2H), 7.34-7.28 (m, 1H), 6.90-6.81 (m, 3H), 6.76-6.69 (m, 1H), 4.35 (q,  $J = 7.2$  Hz, 2H), 1.36 (t,  $J = 7.2$  Hz, 3H).  $^{13}\text{C}$  NMR (101 MHz,  $\text{CDCl}_3$ )  $\delta$  160.77, 148.02, 145.87, 139.99 (q,  $J_{C-F} = 3.0$  Hz), 134.33, 129.97, 129.70, 128.22, 127.54, 125.16, 122.90 (q,  $J_{C-F} = 35.4$  Hz), 120.60 (q,  $J_{C-F} = 274.7$  Hz), 120.57, 116.34, 62.51, 13.77.  $^{19}\text{F}$  NMR (376 MHz,  $\text{CDCl}_3$ )  $\delta$  -59.70; MS (EI, m/z): 349  $[\text{M}]^+$ . HRMS (ESI): Calcd. for  $\text{C}_{18}\text{H}_{14}\text{F}_3\text{NO}_3$   $[\text{M}+\text{H}]^+$ : 350.0999; found: 350.0992.

**(33) 1-phenyl-2-(trifluoromethyl)-3-(trimethylsilyl)-1*H*-benzo[*b*][1,4]oxazine (7a)**

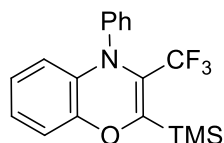

Colorless oil (62.1 mg, 89% yield);  $^1\text{H}$  NMR (400 MHz,  $\text{CDCl}_3$ )  $\delta$  7.44 (d,  $J = 7.6$  Hz, 2H), 7.36 (t,  $J = 7.6$  Hz, 2H), 7.23 (t,  $J = 7.6$  Hz, 1H), 6.88-6.78 (m, 2H), 6.77-6.68 (m, 2H), 0.30 (s, 9H).  $^{13}\text{C}$  NMR (101 MHz,  $\text{CDCl}_3$ )  $\delta$  158.54 (q,  $J_{\text{C-F}} = 4.7$  Hz), 150.66, 148.28, 137.11, 130.57, 129.18 (q,  $J_{\text{C-F}} = 35.4$  Hz), 128.37, 127.61, 125.78, 125.34, 123.21 (q,  $J_{\text{C-F}} = 274.7$  Hz), 122.25, 116.98, 0.02.  $^{19}\text{F}$  NMR (376 MHz,  $\text{CDCl}_3$ )  $\delta$  -59.10; MS (EI,  $m/z$ ): 349  $[\text{M}]^+$ . HRMS (ESI): Calcd. for  $\text{C}_{18}\text{H}_{18}\text{F}_3\text{NOSi}$   $[\text{M}+\text{H}]^+$ : 350.1183; found: 350.1177.

**(34) *N*-(3-(2-bromophenoxy)-1,1,1-trifluoropropan-2-ylidene)-4-methoxyaniline (3ae')**

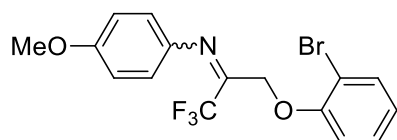

Yellow oil (95.2 mg, 82% yield)  $^1\text{H}$  NMR (400 MHz,  $\text{CDCl}_3$ )  $\delta$  7.56 (dd,  $J = 8.0$  Hz, 1.6 Hz, 1H), 7.25-7.18 (m, 1H), 7.05-6.97 (m, 2H), 6.94-6.86 (m, 3H), 6.72 (dd,  $J = 8.0$  Hz, 1.6 Hz, 1H), 4.70 (s, 2H), 3.81 (s, 3H).  $^{13}\text{C}$  NMR (101 MHz,  $\text{CDCl}_3$ )  $\delta$  158.58, 154.08, 152.52 (q,  $J_{\text{C-F}} = 33.3$  Hz), 138.94, 133.82, 128.50, 123.42, 122.05, 119.61 (q,  $J_{\text{C-F}} = 274.7$  Hz), 114.44, 113.54, 112.56, 61.78, 55.49. MS (EI,  $m/z$ ): 387  $[\text{M}]^+$ .



## NMR spectra of the obtained compounds

### <sup>1</sup>H-NMR spectrum of 2j

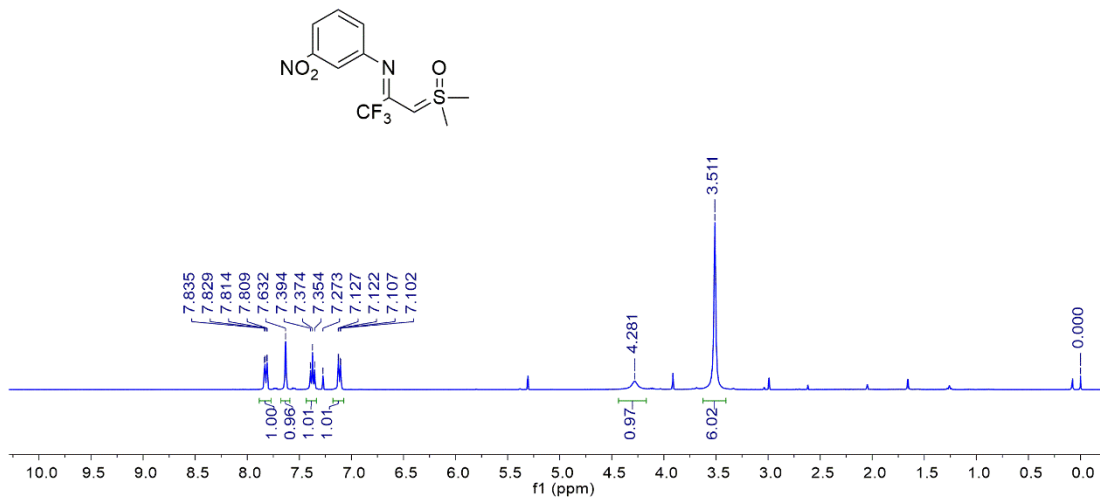

### <sup>13</sup>C-NMR spectrum of 2j

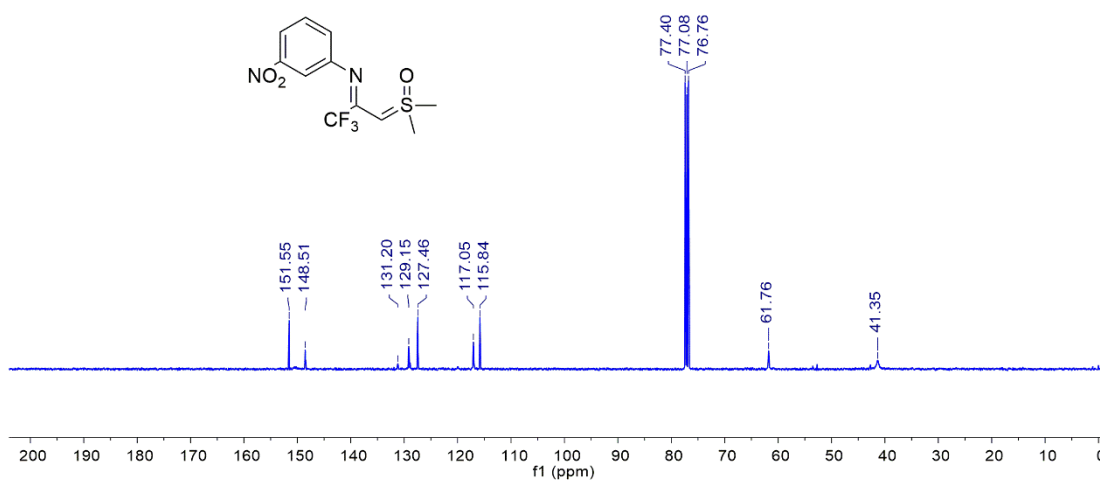

### <sup>1</sup>H-NMR spectrum of 2k

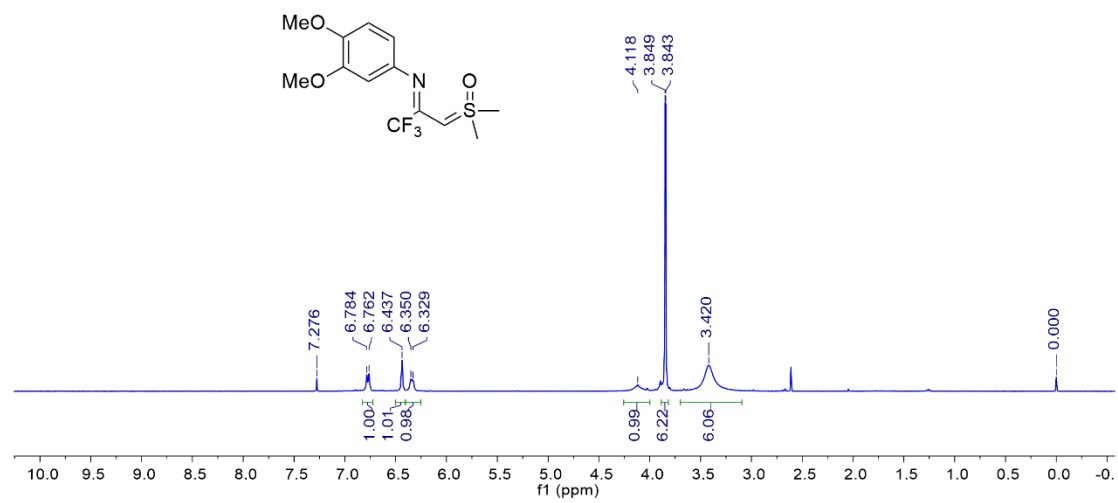

### <sup>13</sup>C-NMR spectrum of 2k

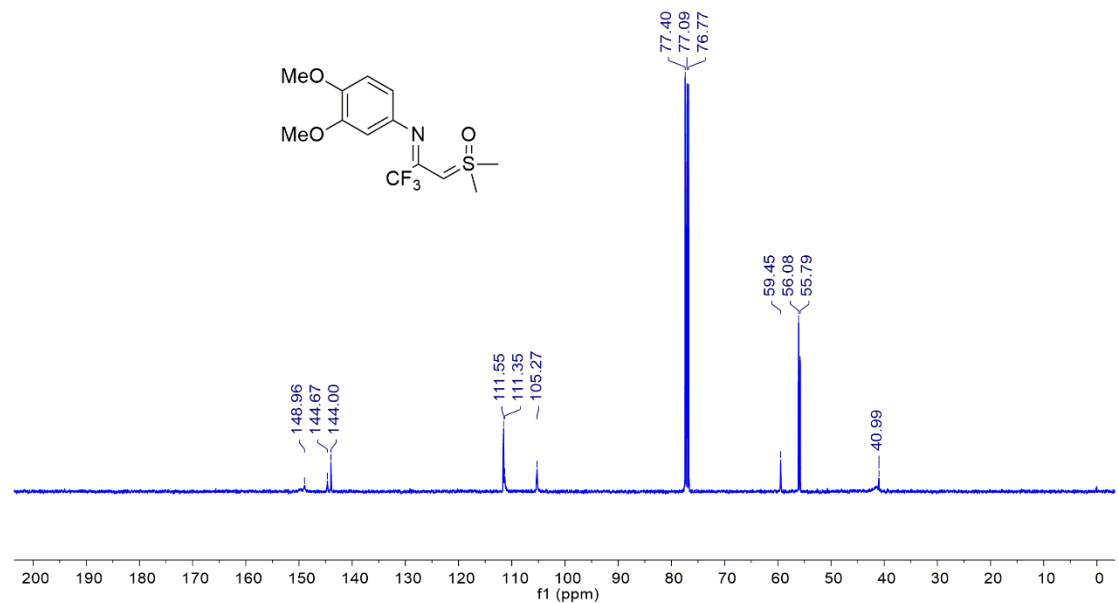

### <sup>1</sup>H-NMR spectrum of 2l

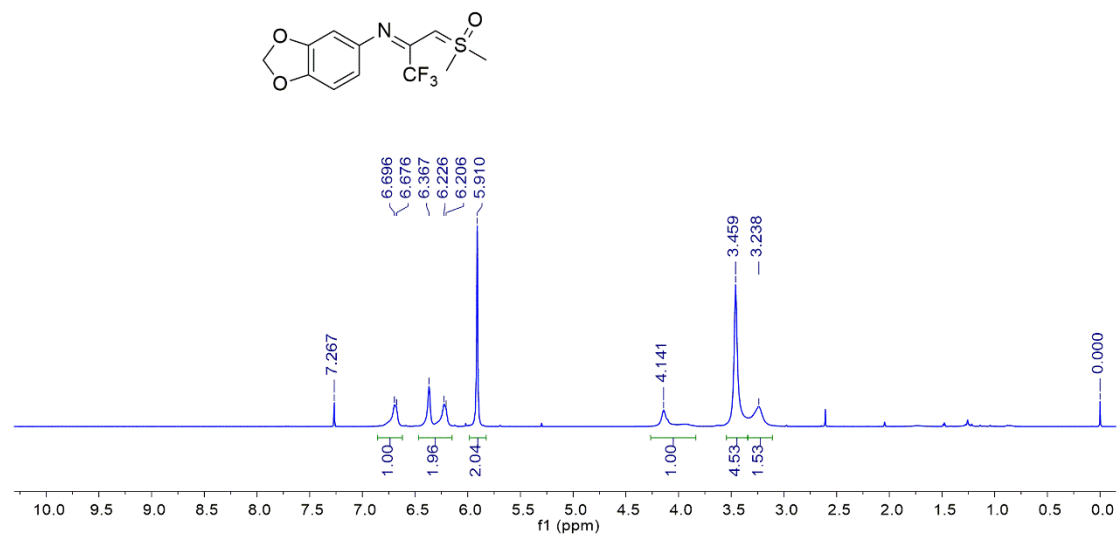

### <sup>13</sup>C-NMR spectrum of 2l

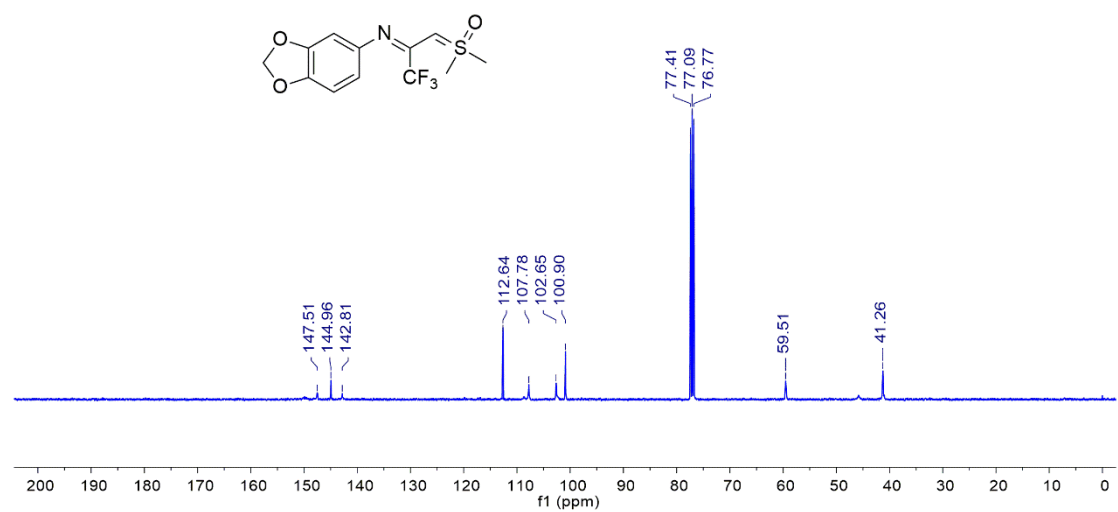

### <sup>1</sup>H-NMR spectrum of 2m

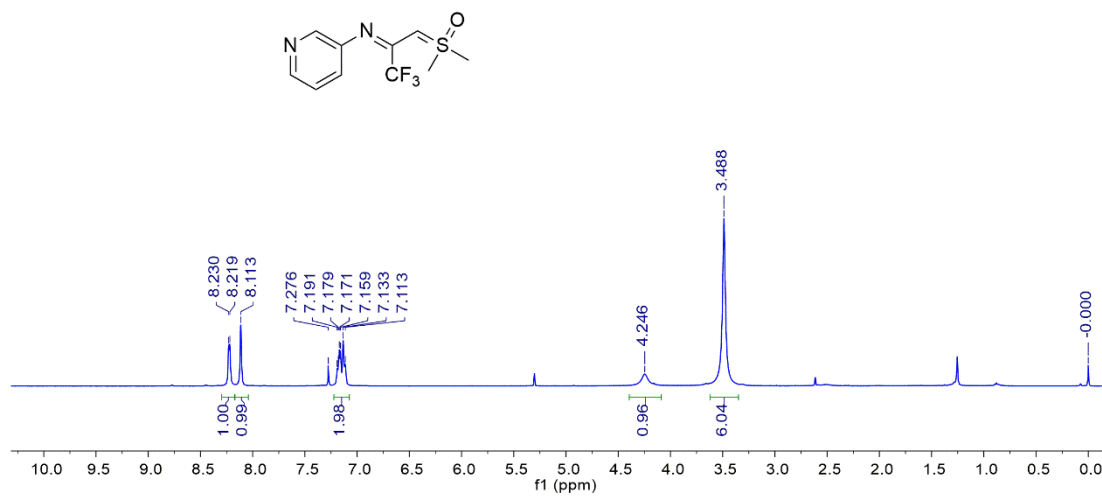

### <sup>13</sup>C-NMR spectrum of 2m

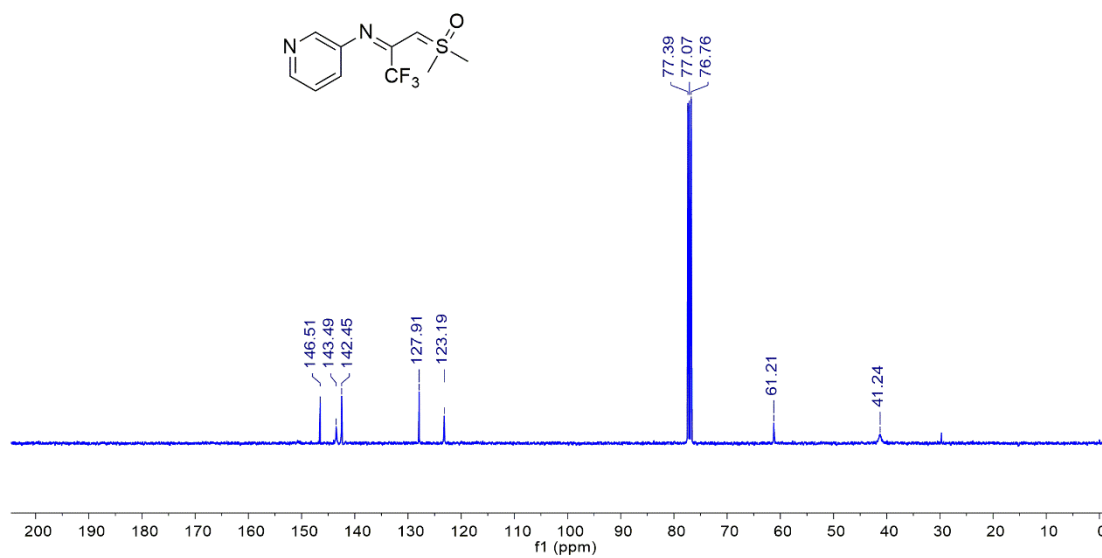

### <sup>1</sup>H-NMR spectrum of 2n

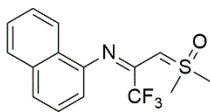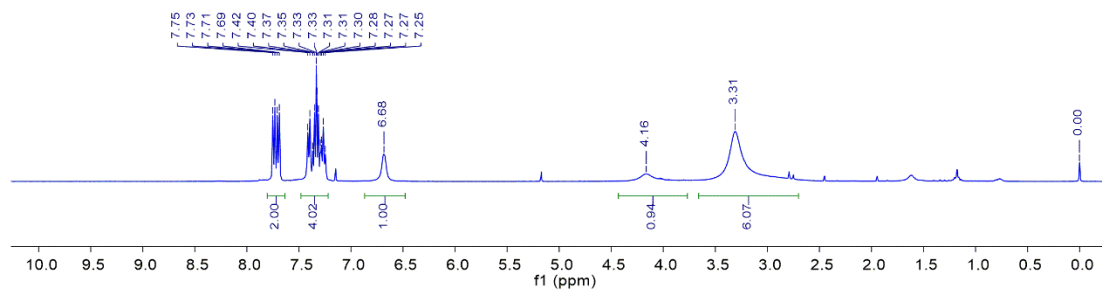

### <sup>13</sup>C-NMR spectrum of 2n

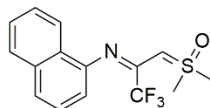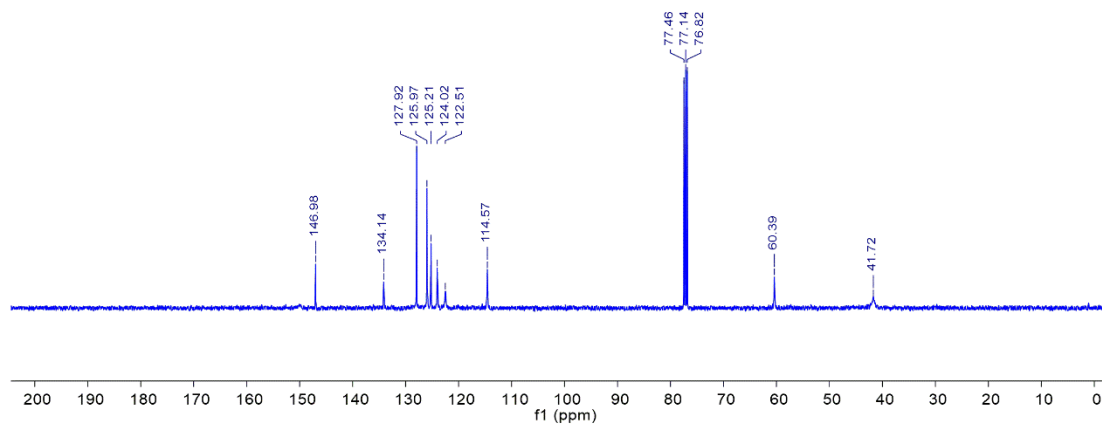

### <sup>1</sup>H-NMR spectrum of 2o

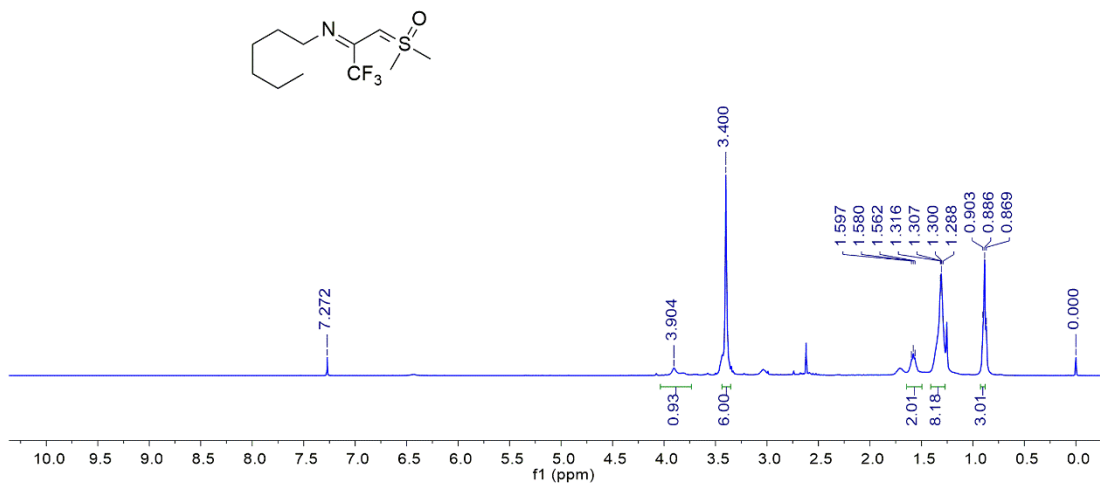

### <sup>13</sup>C-NMR spectrum of 2o

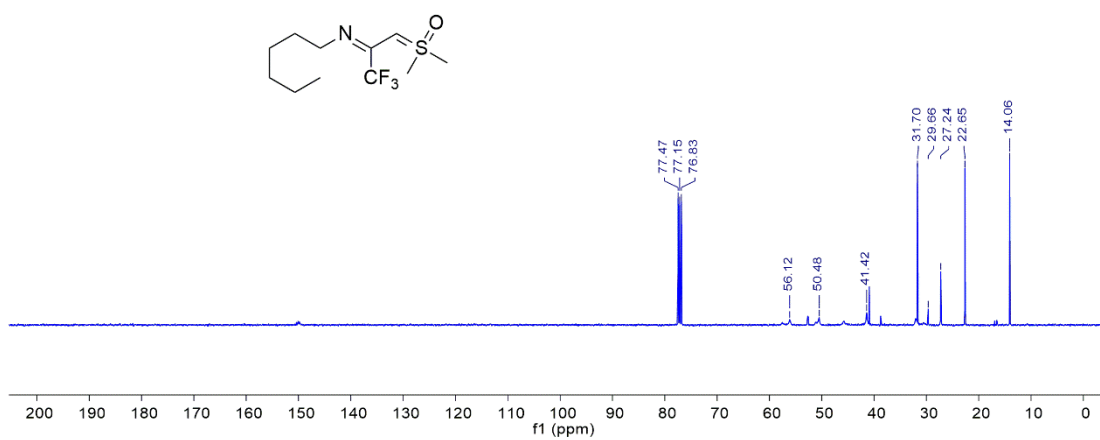

### <sup>1</sup>H-NMR spectrum of 3aa

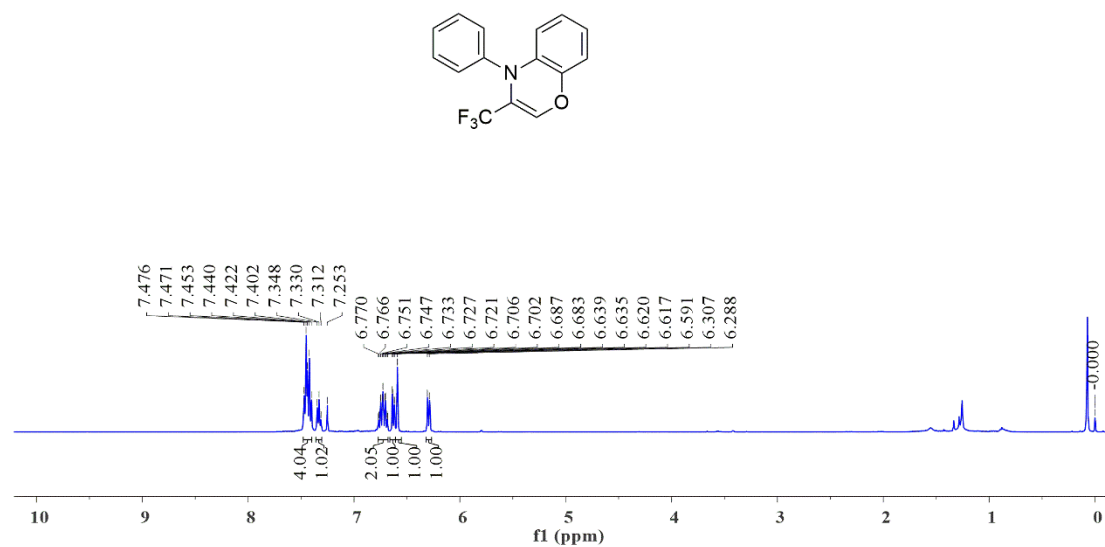

### <sup>13</sup>C-NMR spectrum of 3aa

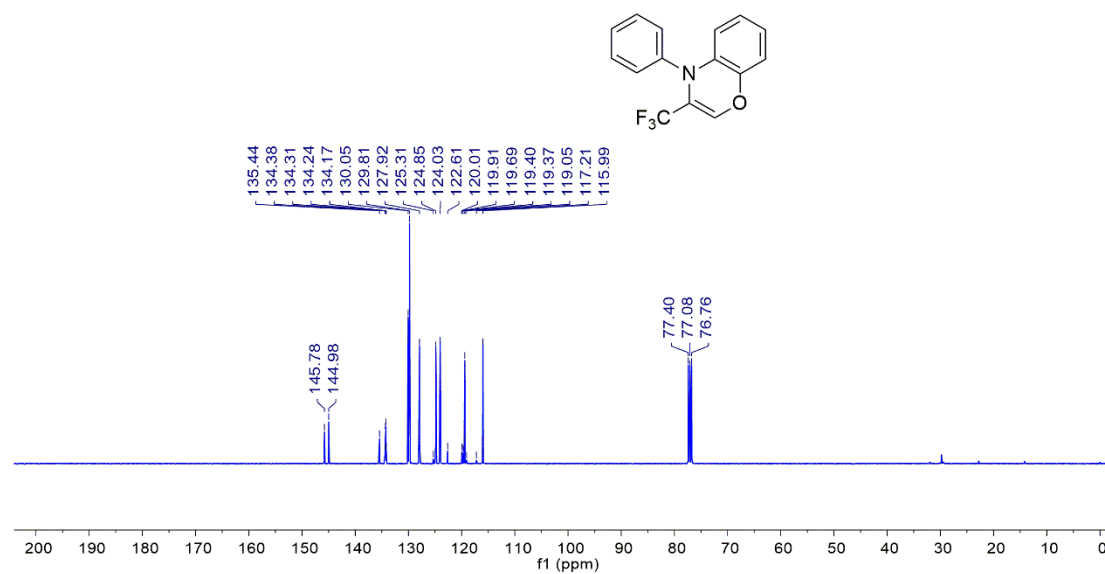

### <sup>19</sup>F-NMR spectrum of 3aa

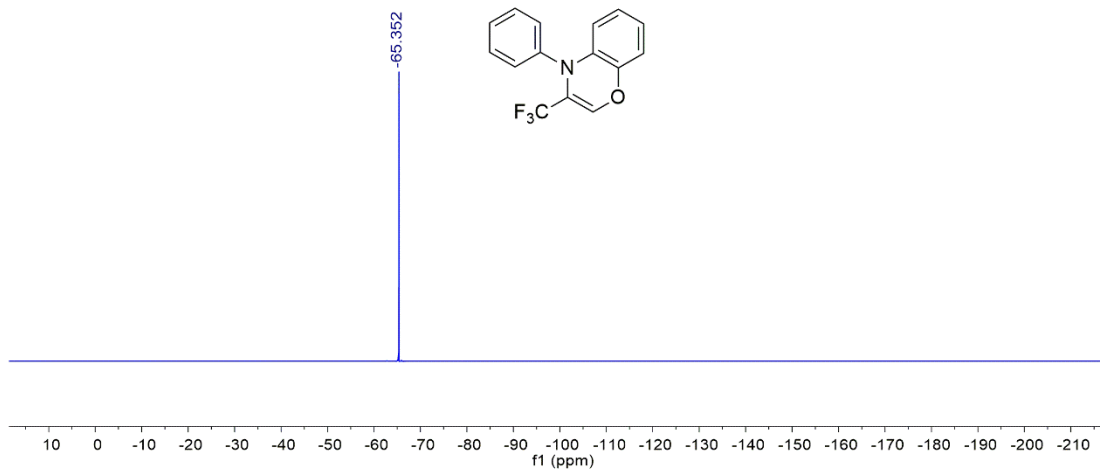

### <sup>1</sup>H-NMR spectrum of 3ab

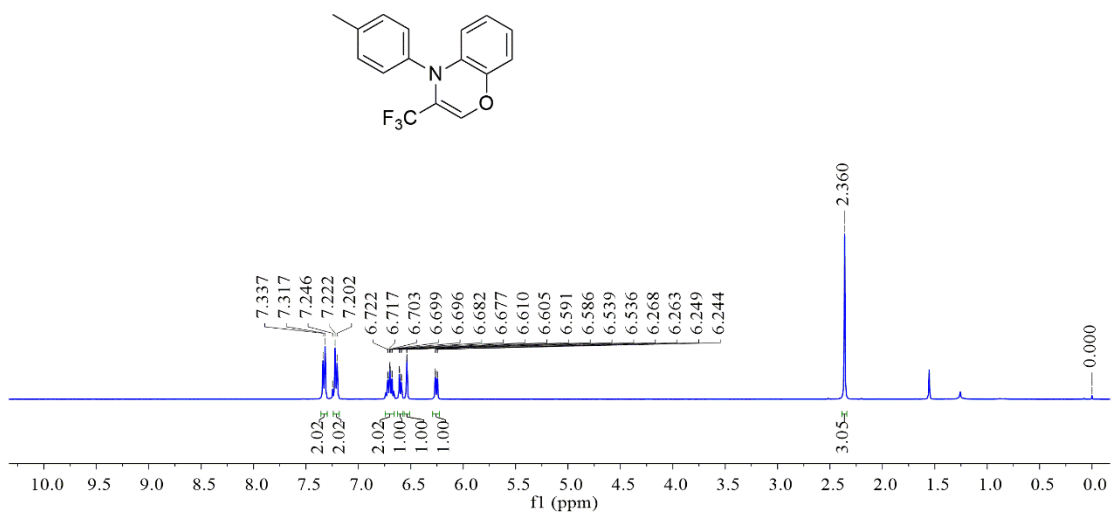



### <sup>13</sup>C-NMR spectrum of 3ab

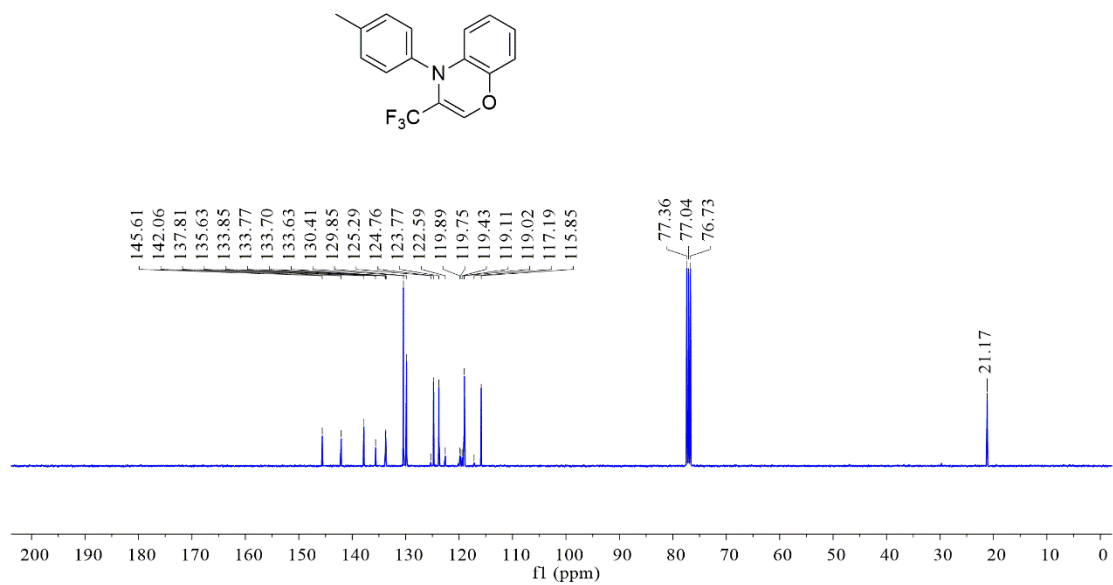

### <sup>19</sup>F-NMR spectrum of 3ab

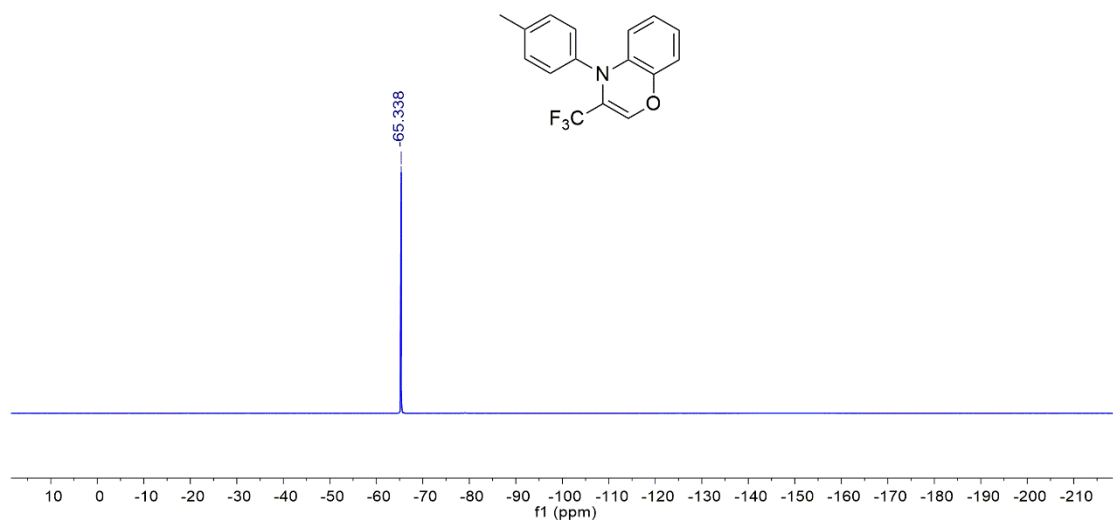

### <sup>1</sup>H-NMR spectrum of 3ac

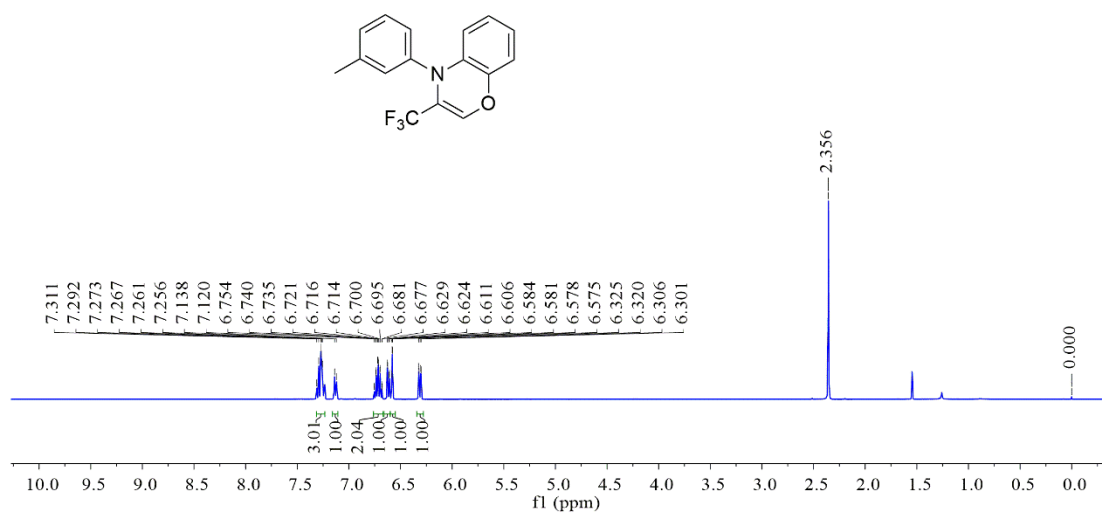

### <sup>13</sup>C-NMR spectrum of 3ac

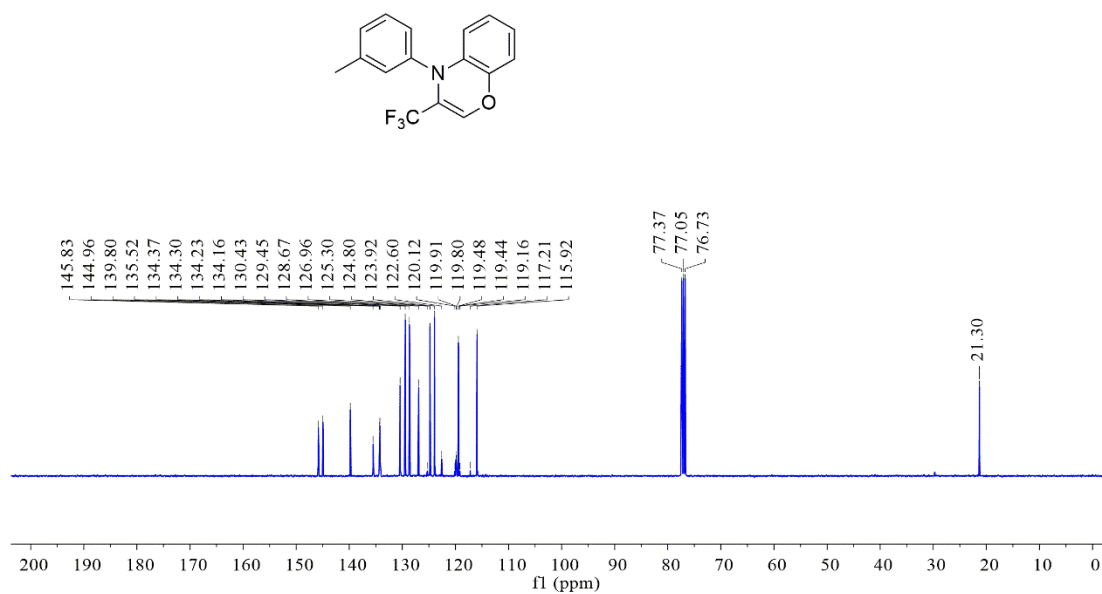

### <sup>19</sup>F-NMR spectrum of 3ac

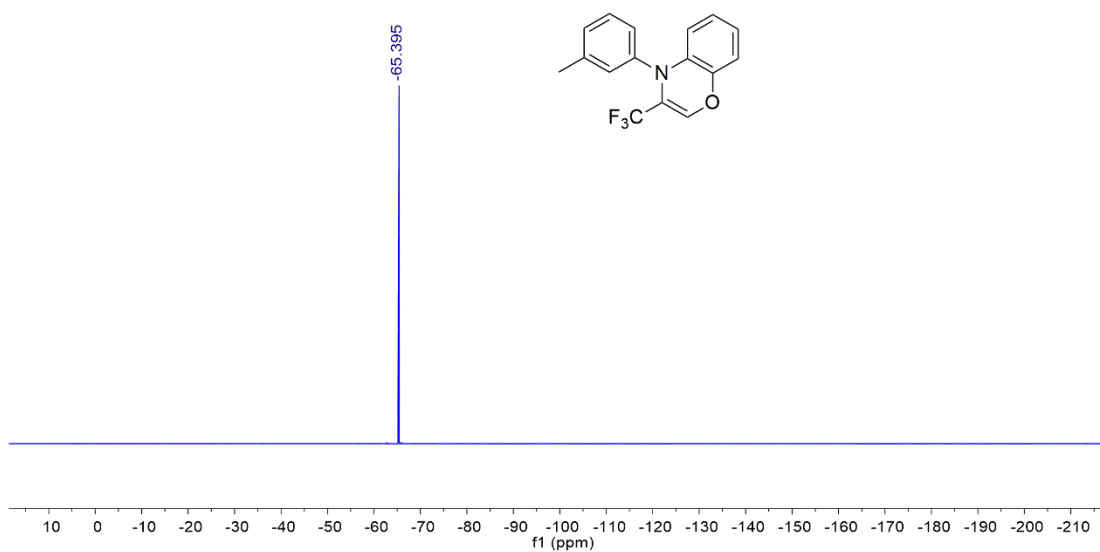

### <sup>1</sup>H-NMR spectrum of 3ad

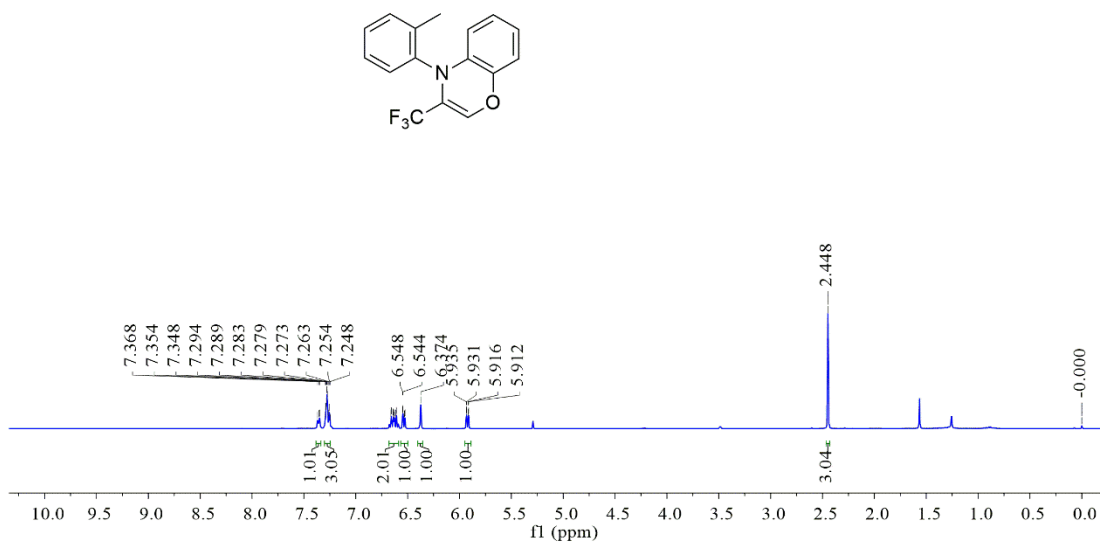

### <sup>13</sup>C-NMR spectrum of 3ad

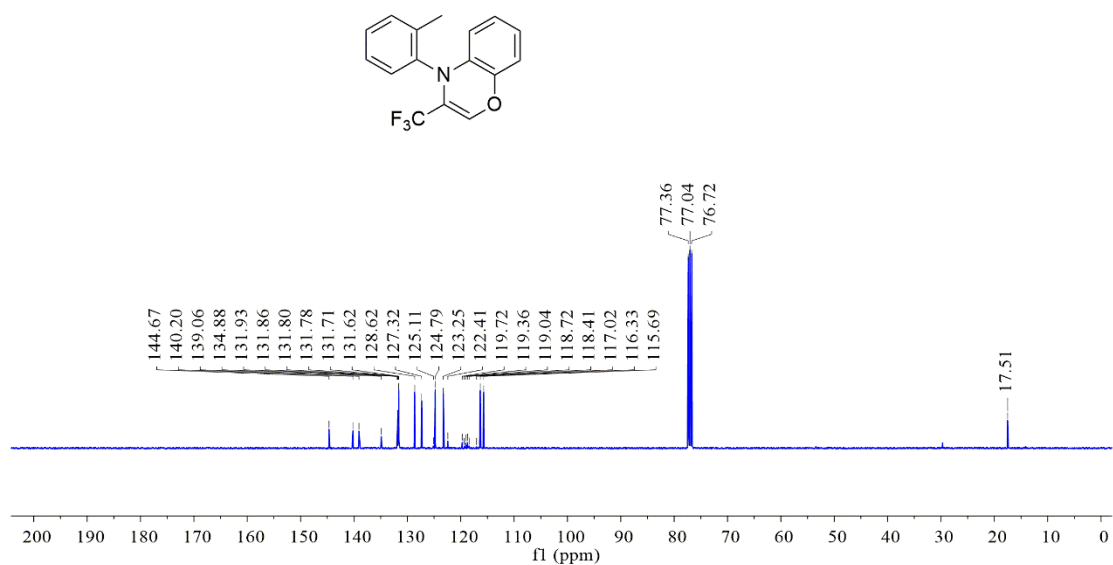

### <sup>19</sup>F-NMR spectrum of 3ad

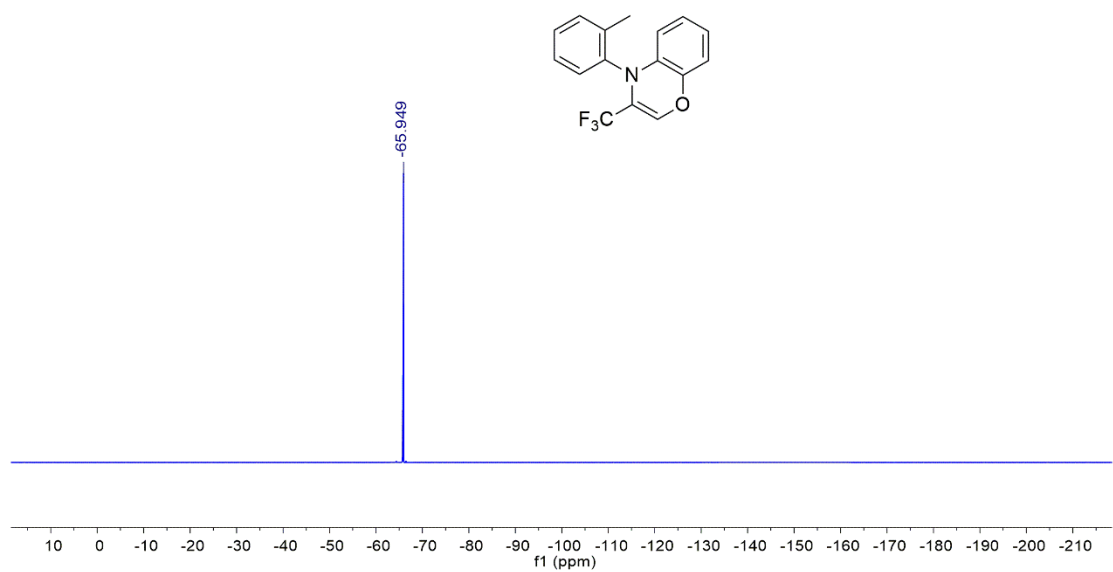

### <sup>1</sup>H-NMR spectrum of 3ae

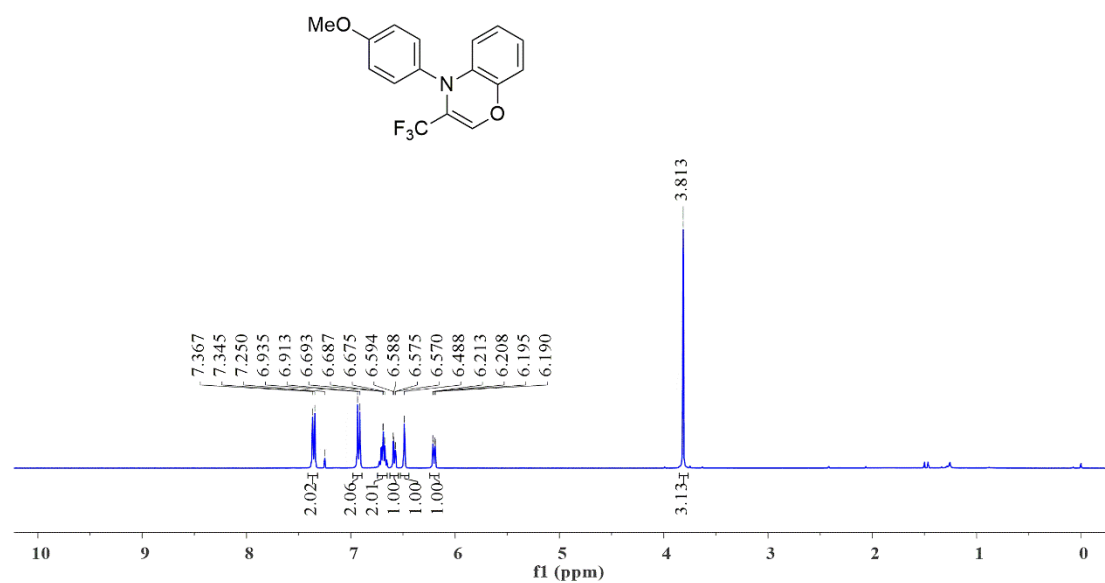

### <sup>13</sup>C-NMR spectrum of 3ae

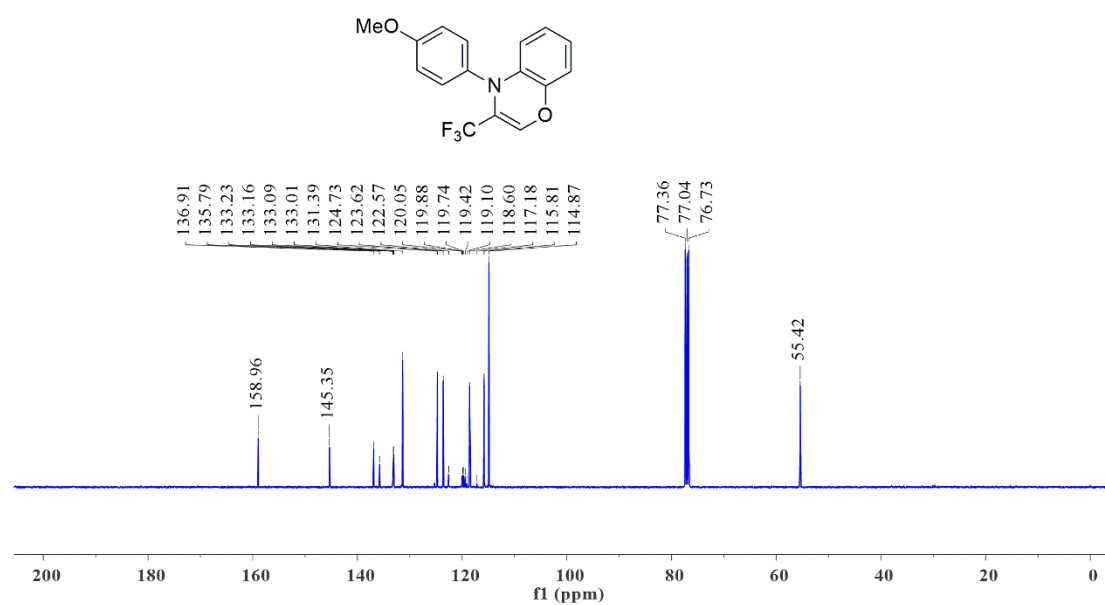

### <sup>19</sup>F-NMR spectrum of 3ae

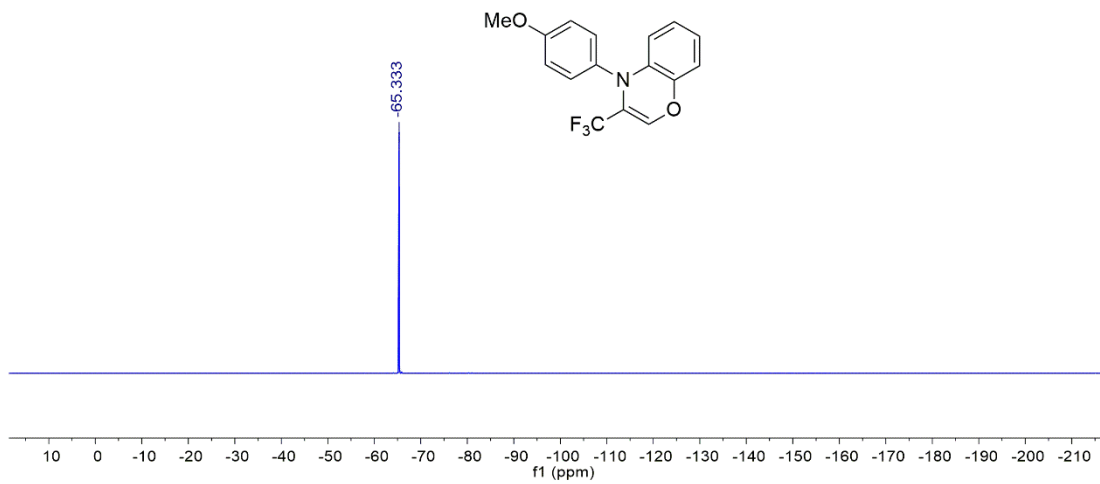

### <sup>1</sup>H-NMR spectrum of 3af

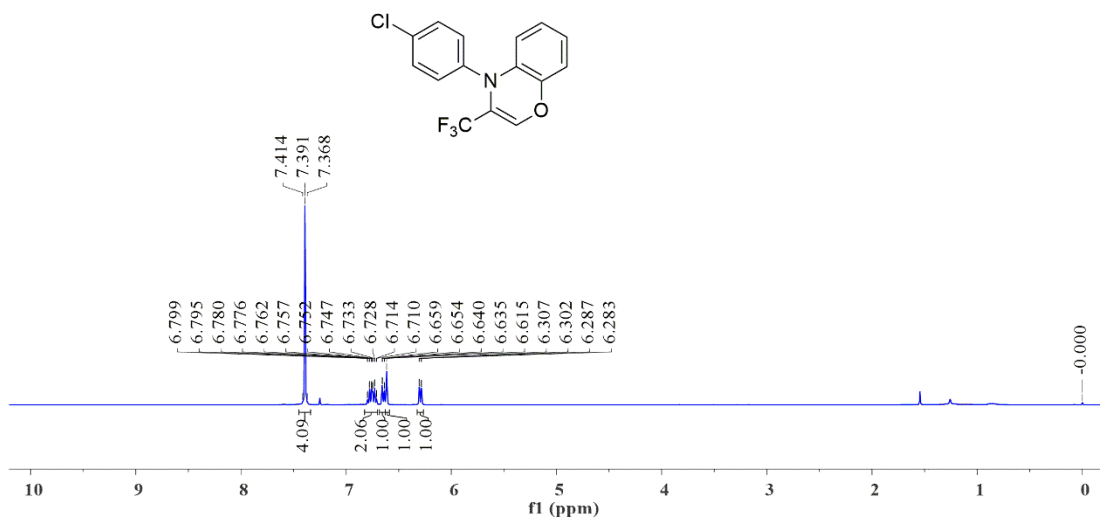

### <sup>13</sup>C-NMR spectrum of 3af

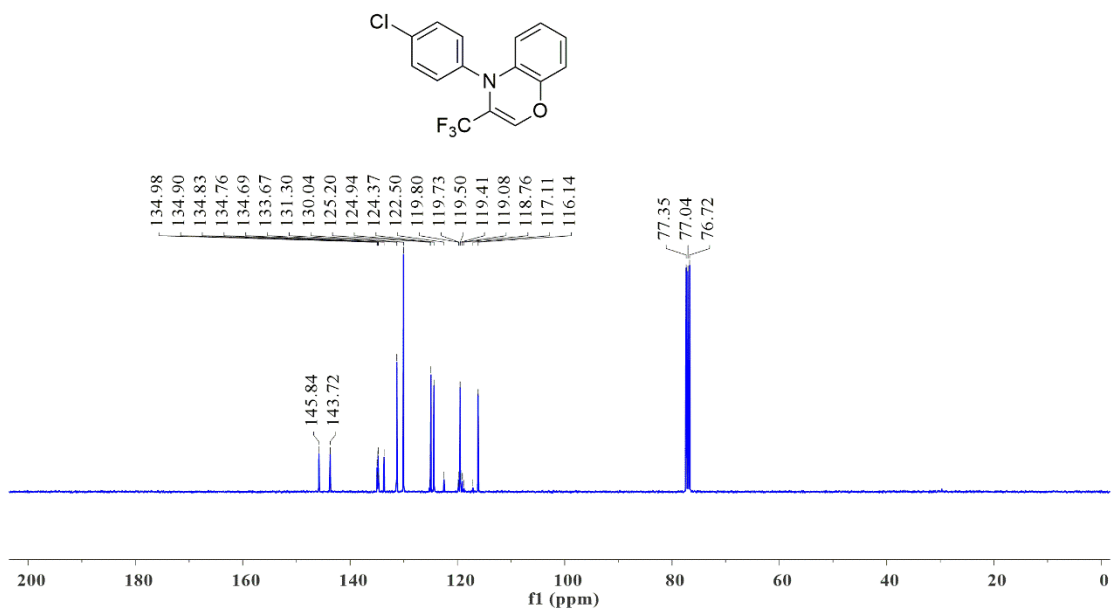

### <sup>19</sup>F-NMR spectrum of 3af

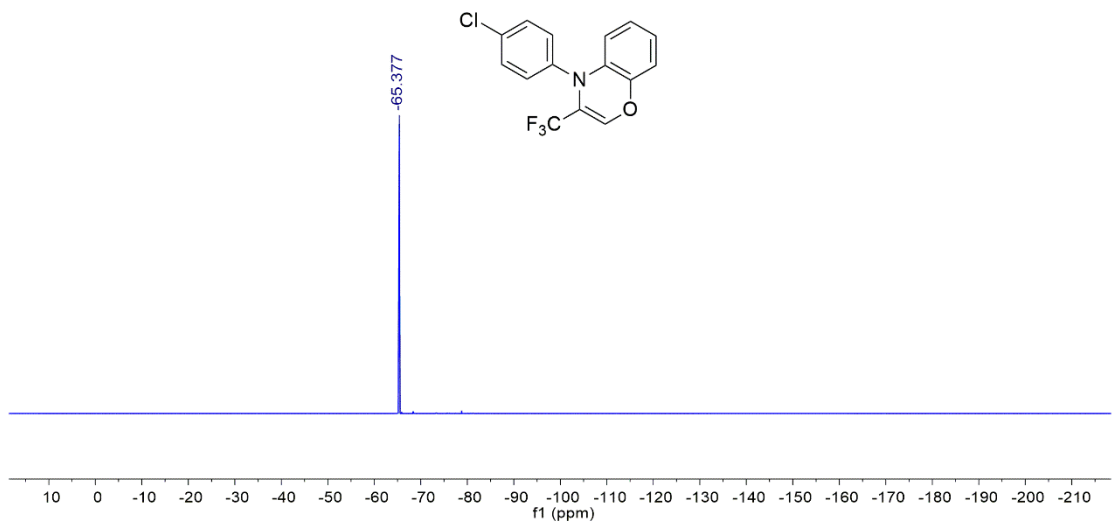

### <sup>1</sup>H-NMR spectrum of 3ag

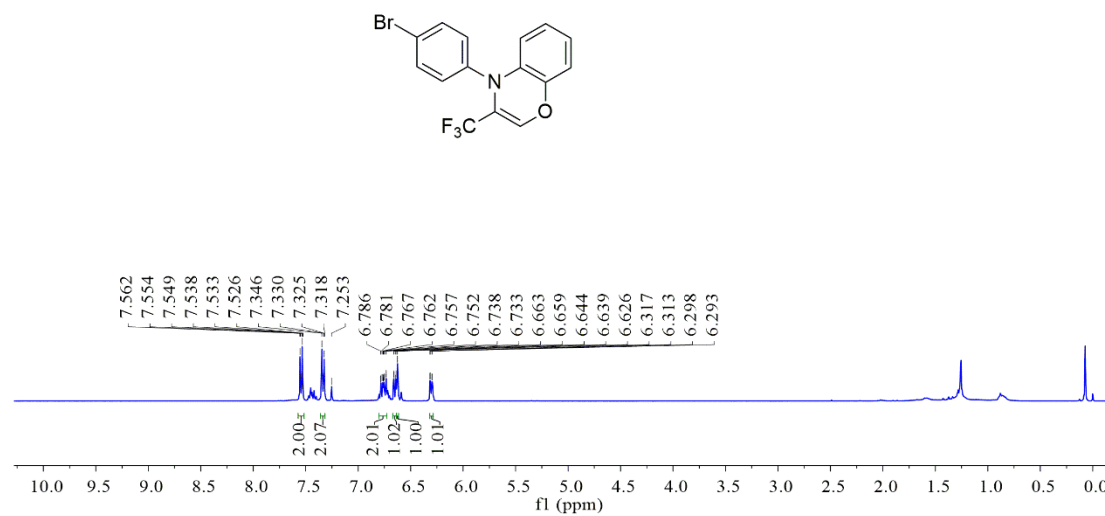

### <sup>13</sup>C-NMR spectrum of 3ag

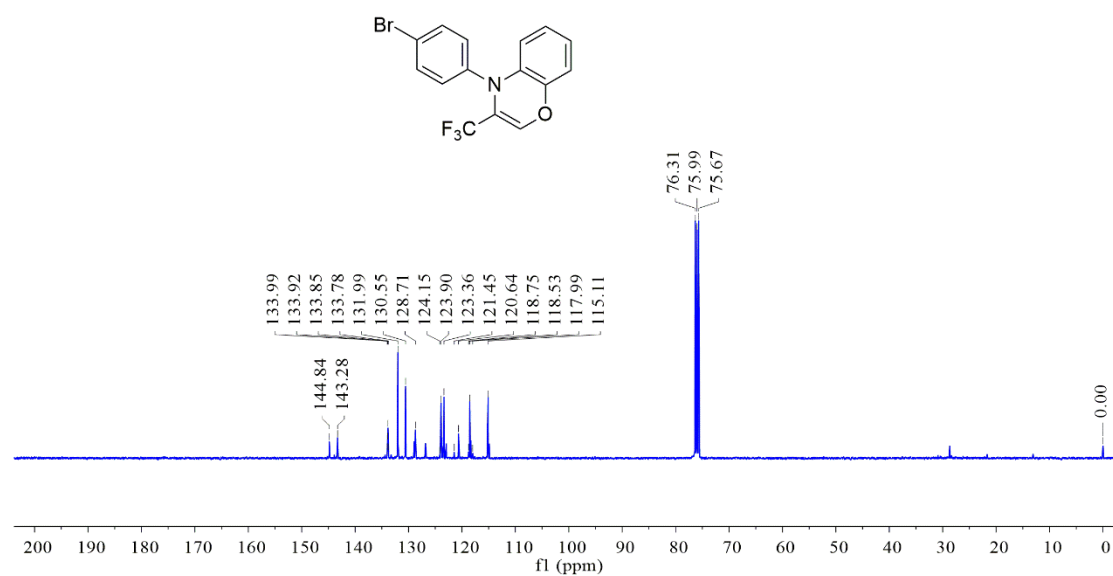



### <sup>19</sup>F-NMR spectrum of 3ag

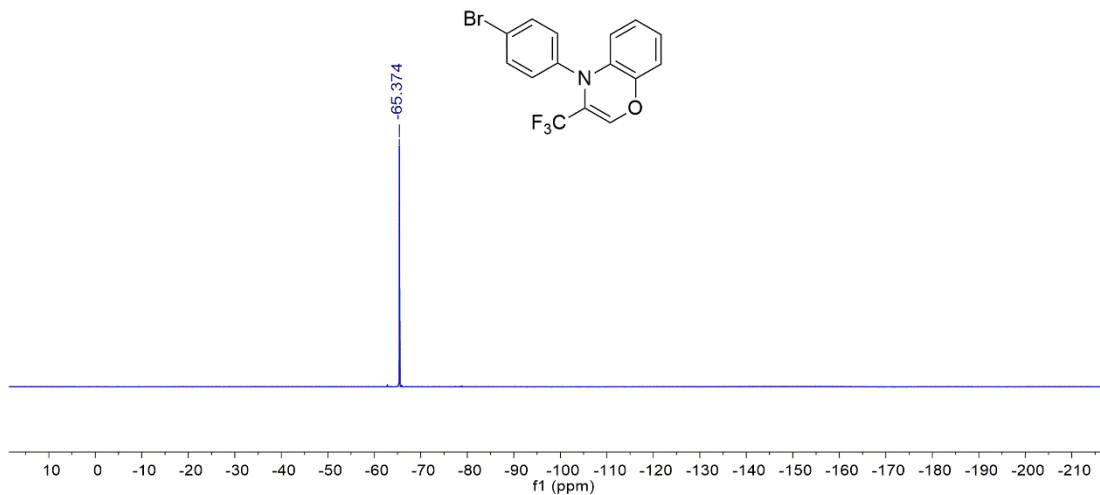

### <sup>1</sup>H-NMR spectrum of 3ah

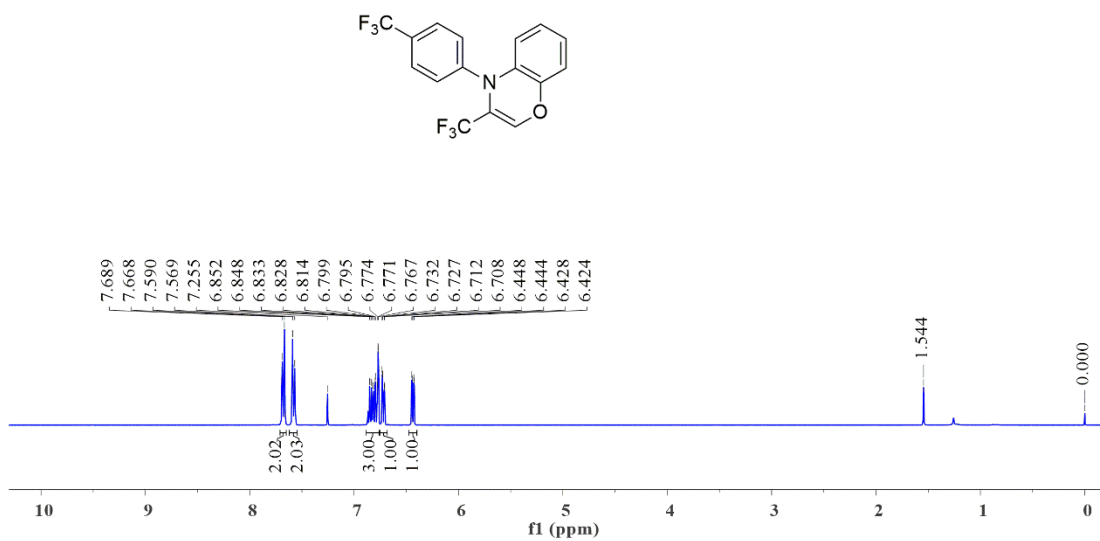

### <sup>13</sup>C-NMR spectrum of 3ah

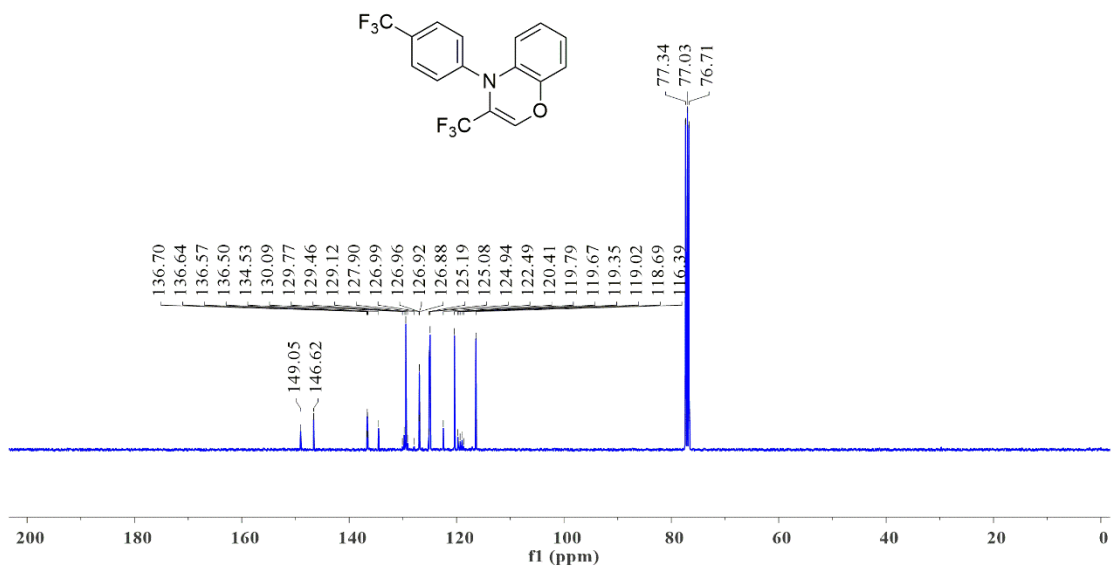

### <sup>19</sup>F-NMR spectrum of 3ah

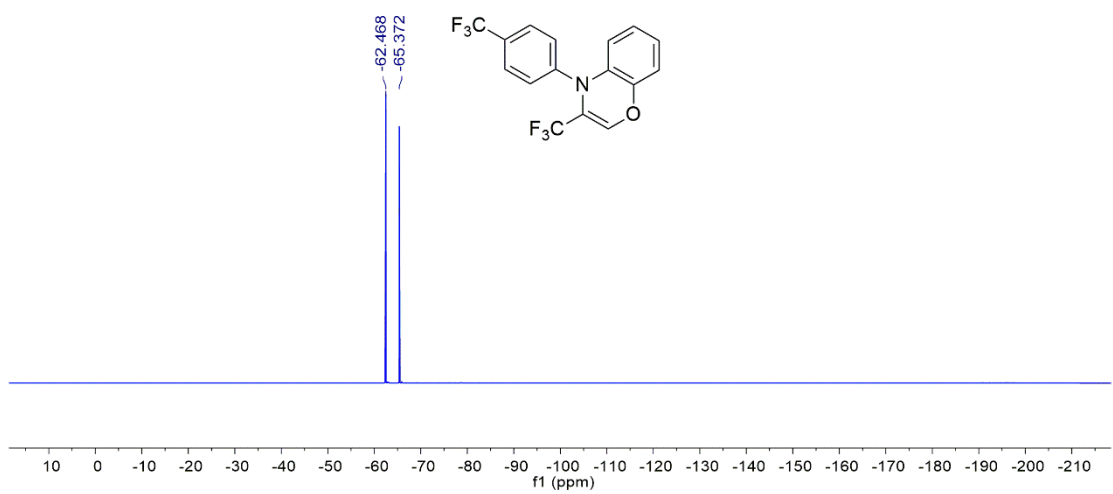

### <sup>1</sup>H-NMR spectrum of 3ai

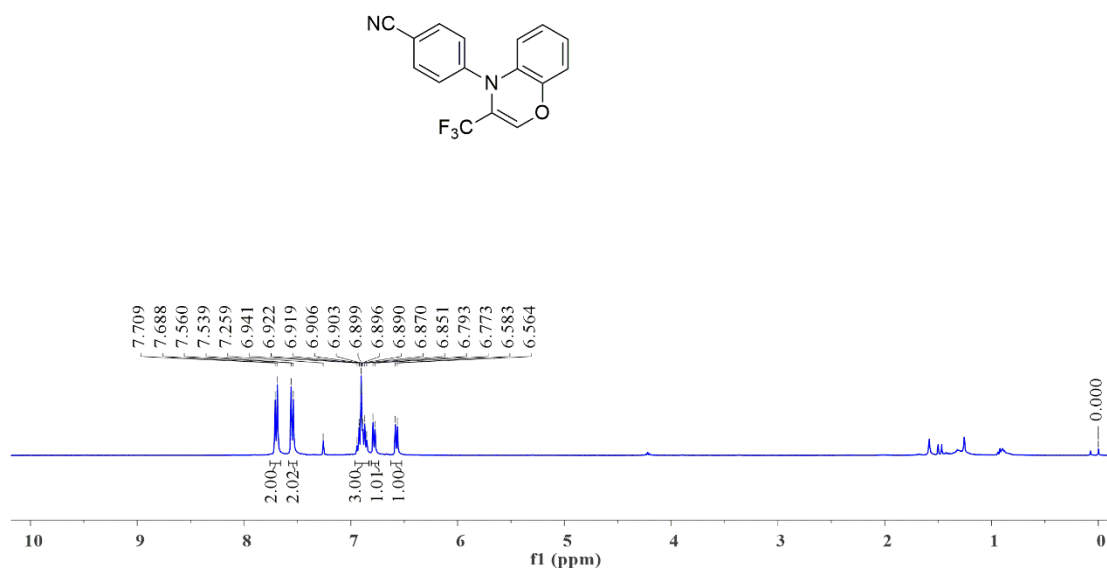

### <sup>13</sup>C-NMR spectrum of 3ai

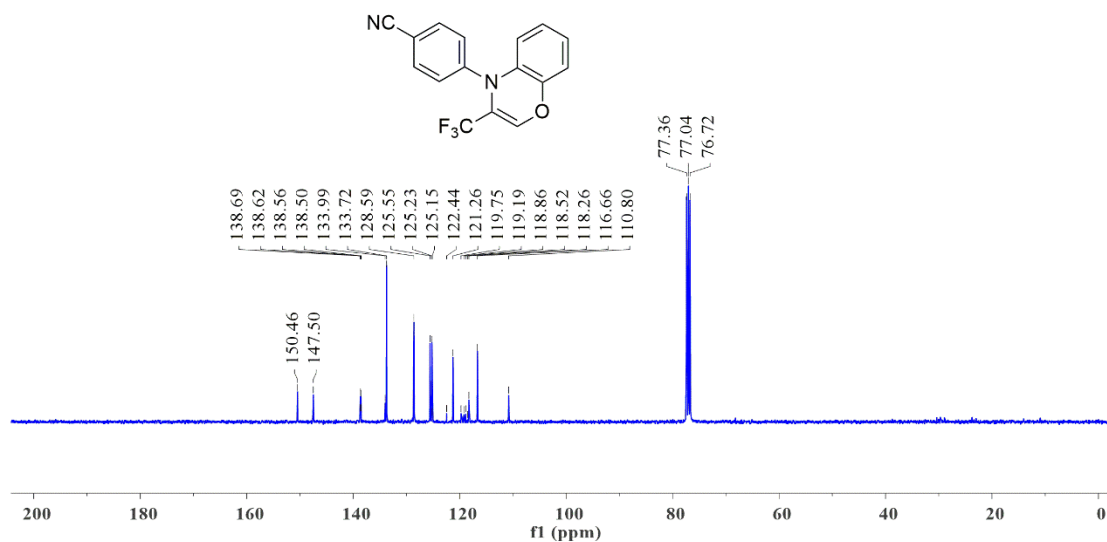

### <sup>19</sup>F-NMR spectrum of 3ai

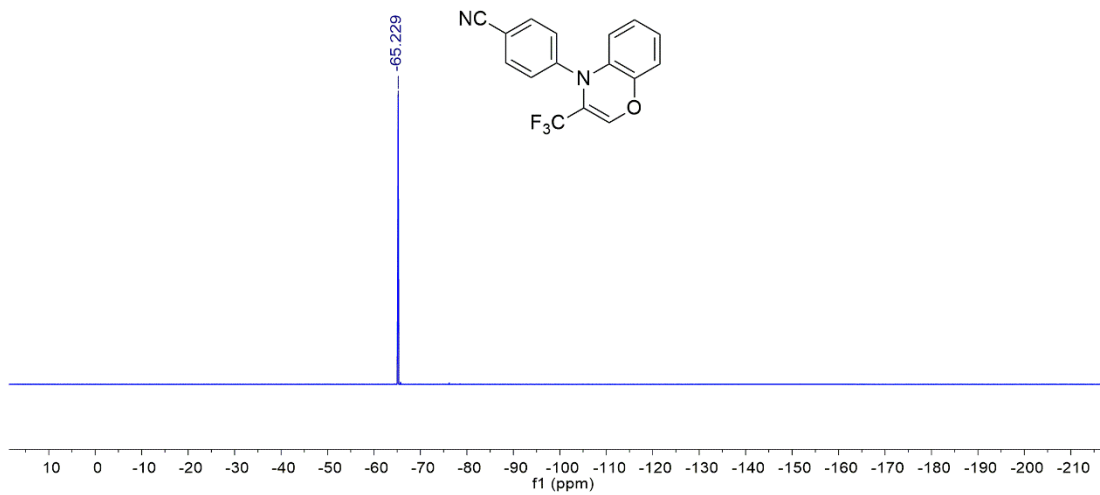

### <sup>1</sup>H-NMR spectrum of 3aj

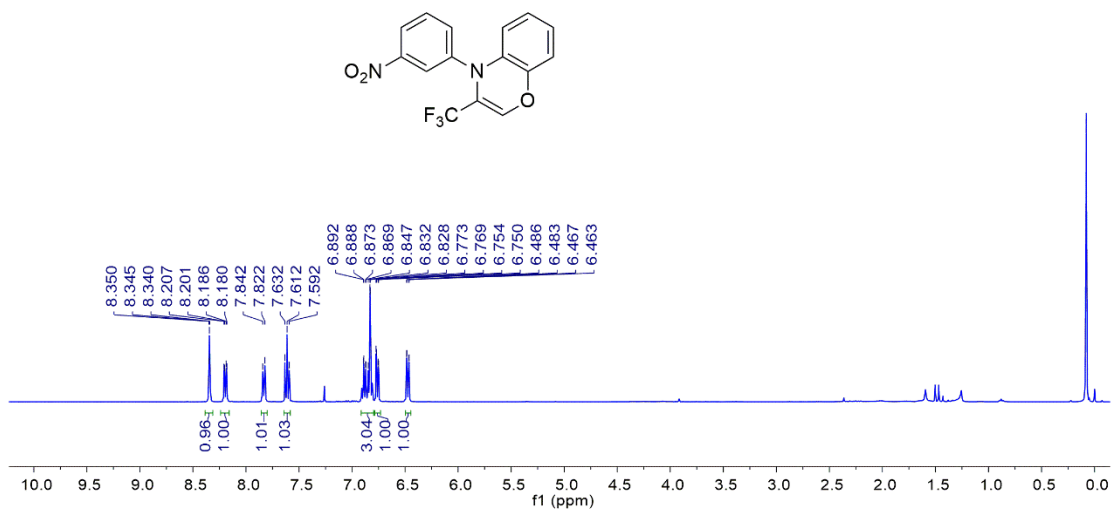

### <sup>13</sup>C-NMR spectrum of 3aj

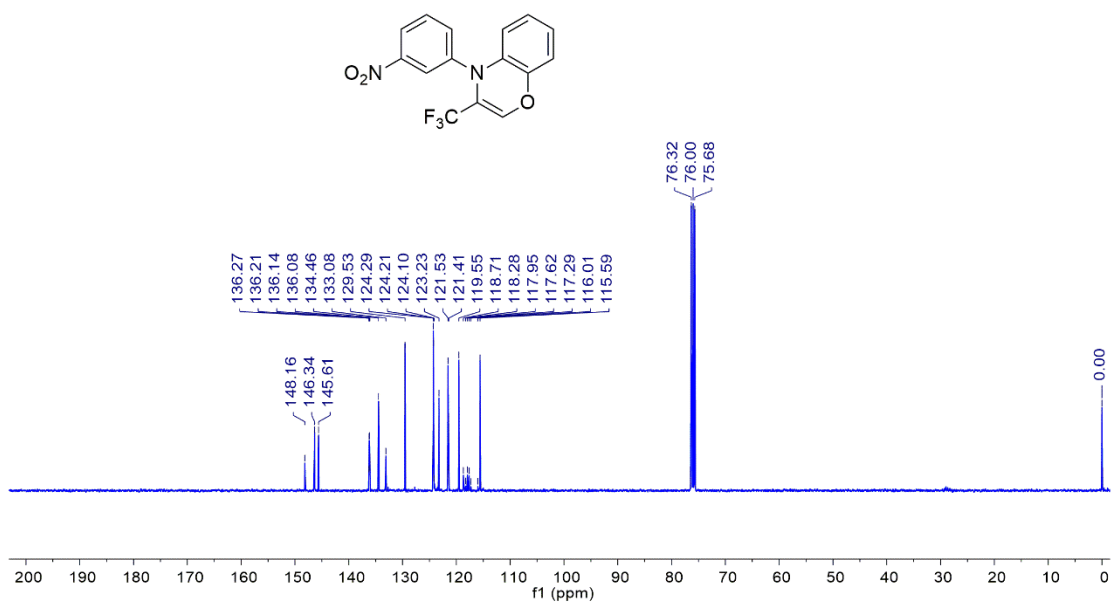

### <sup>19</sup>F-NMR spectrum of 3aj

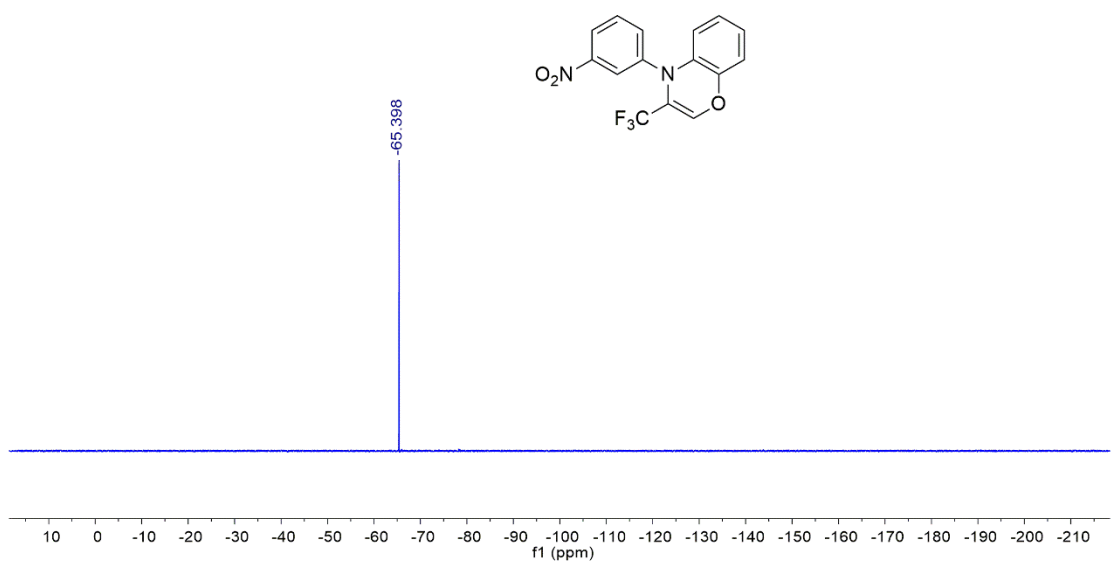

### <sup>1</sup>H-NMR spectrum of 3ak

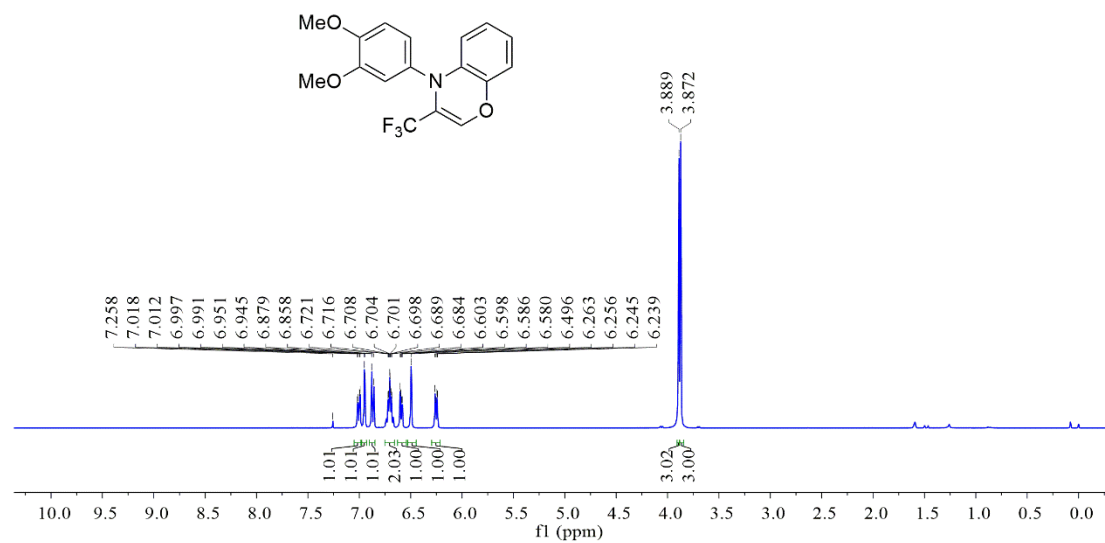

### <sup>13</sup>C-NMR spectrum of 3ak

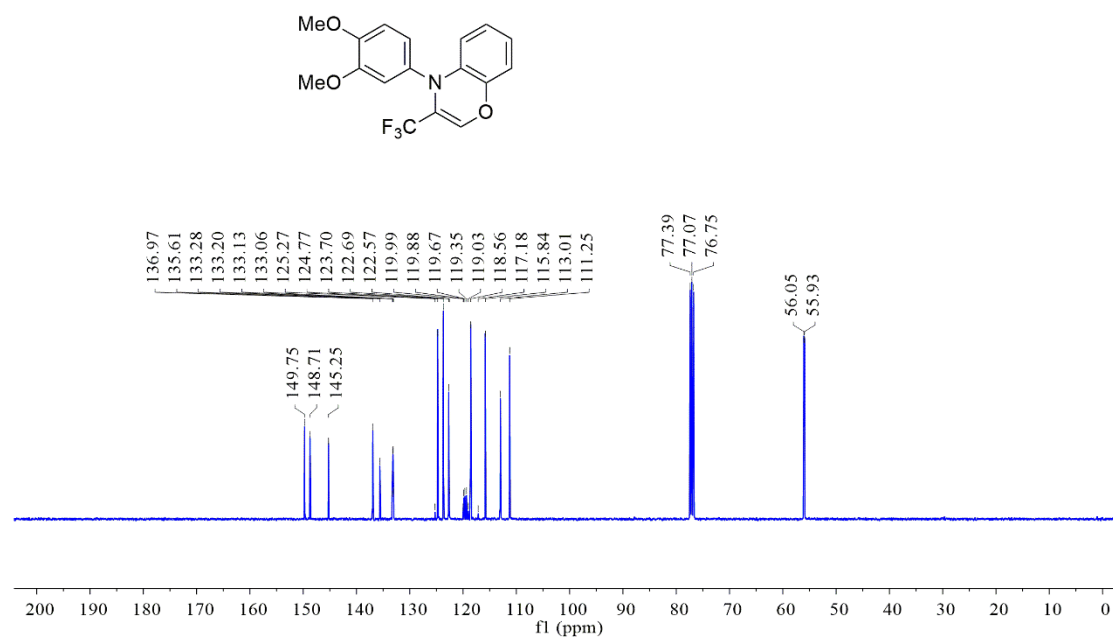

### <sup>19</sup>F-NMR spectrum of 3ak

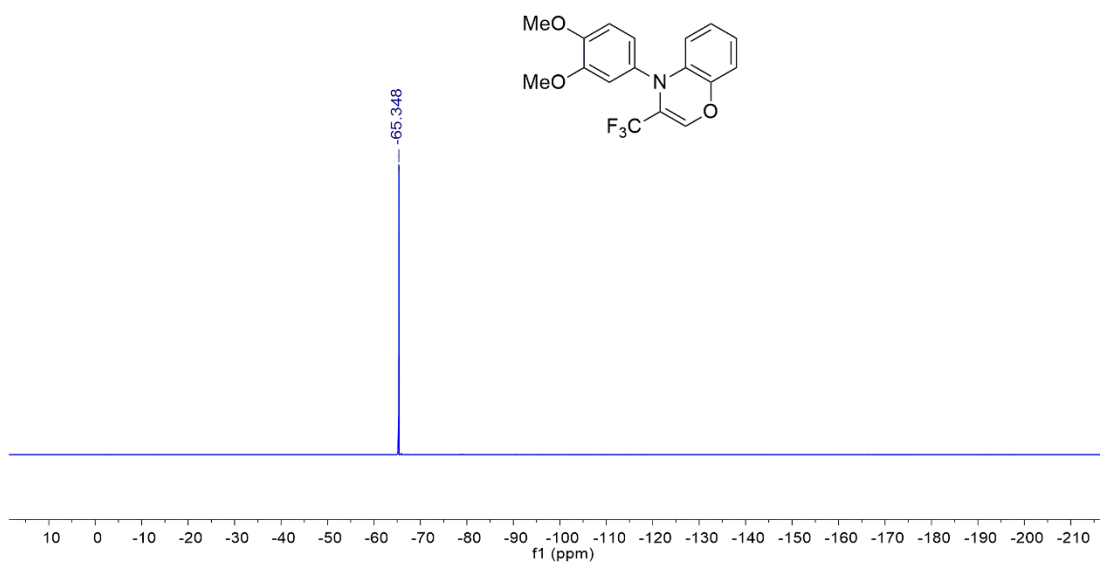

### <sup>1</sup>H-NMR spectrum of 3al

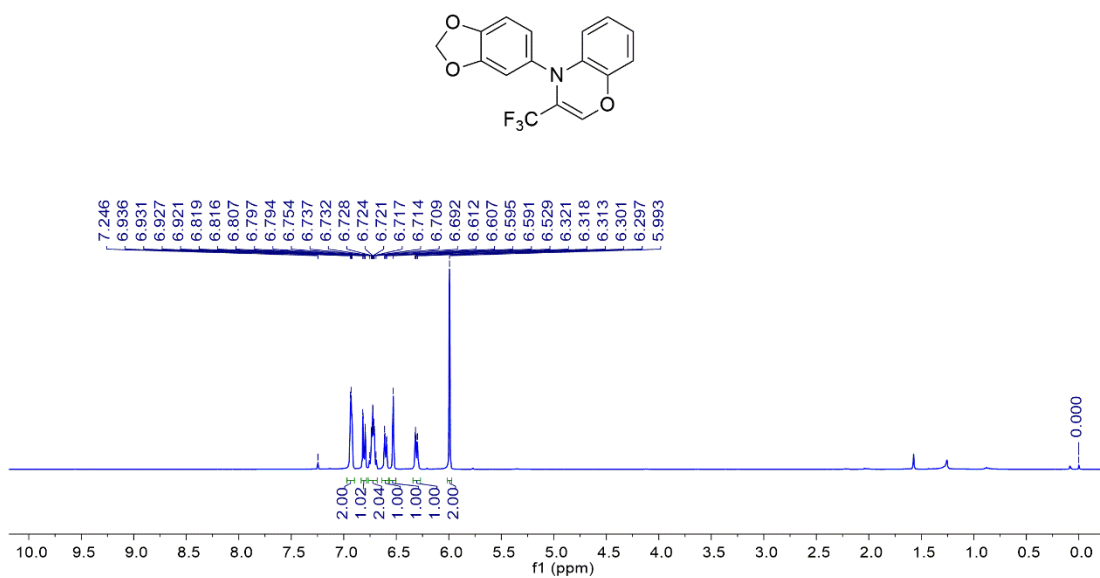

### <sup>13</sup>C-NMR spectrum of 3al

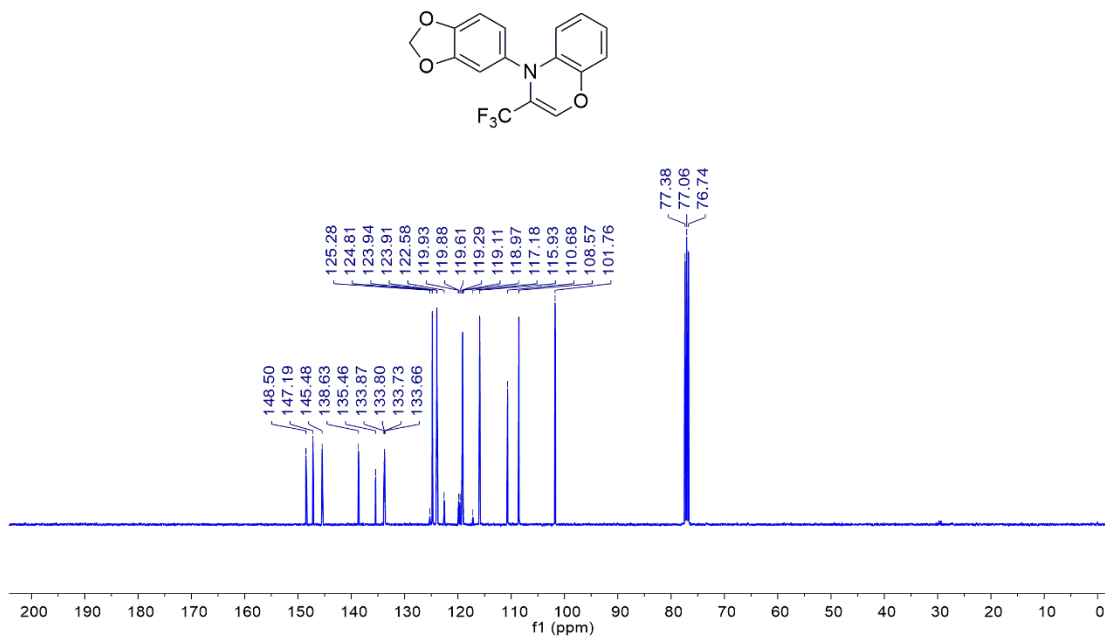

### <sup>19</sup>F-NMR spectrum of 3al

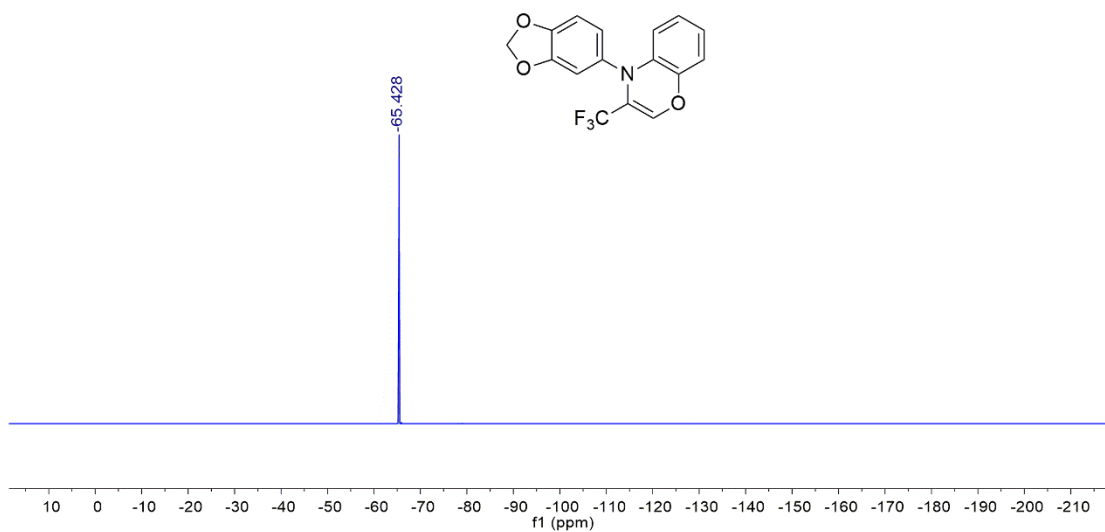



### <sup>1</sup>H-NMR spectrum of 3am

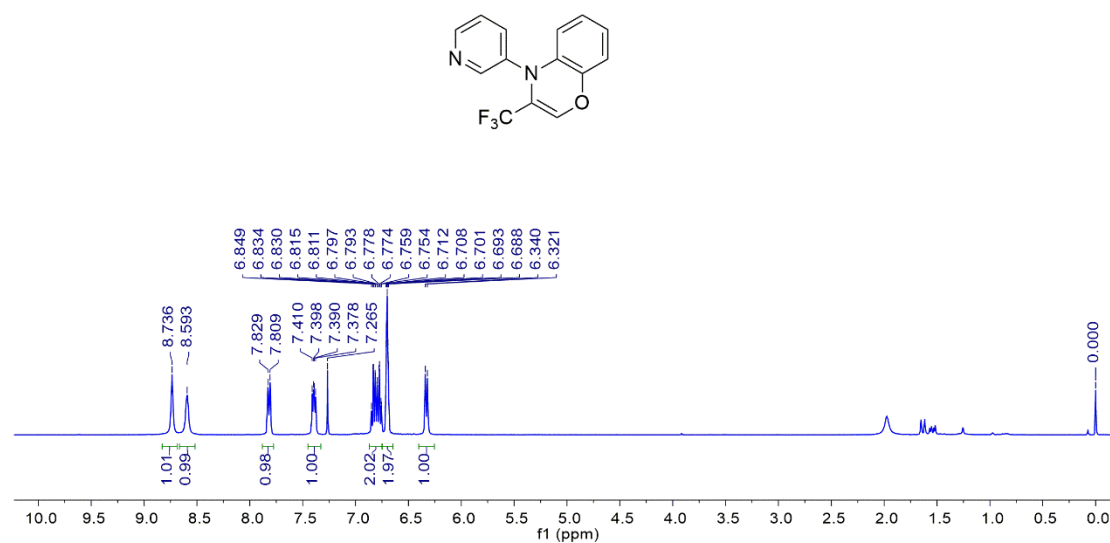

### <sup>13</sup>C-NMR spectrum of 3am

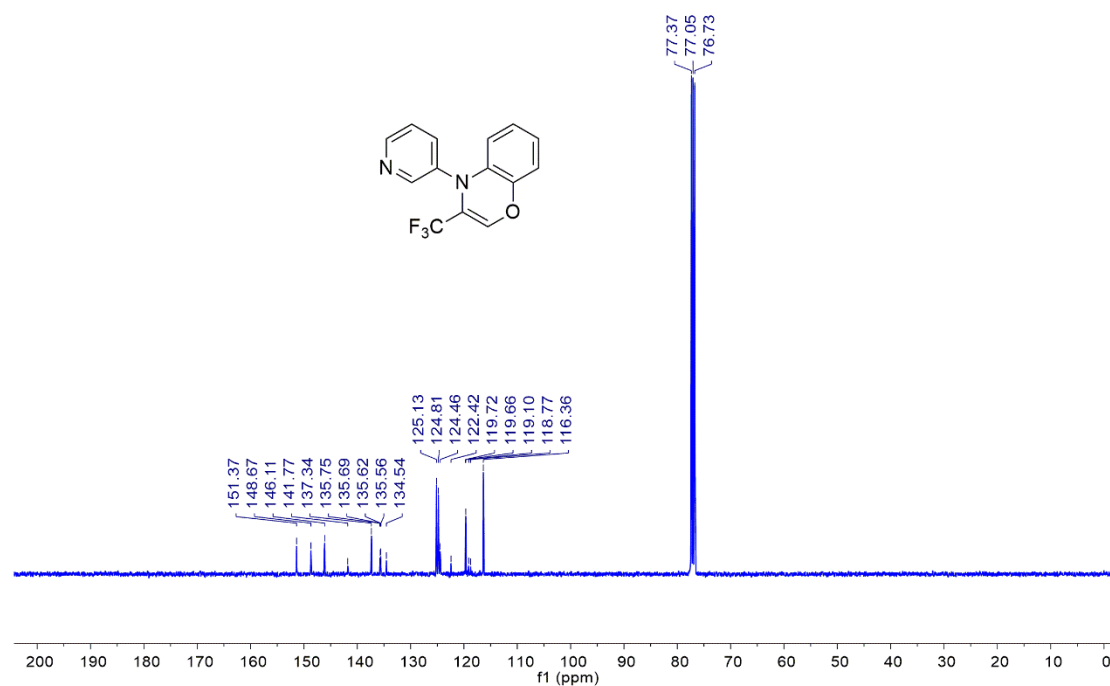

### <sup>19</sup>F-NMR spectrum of 3am

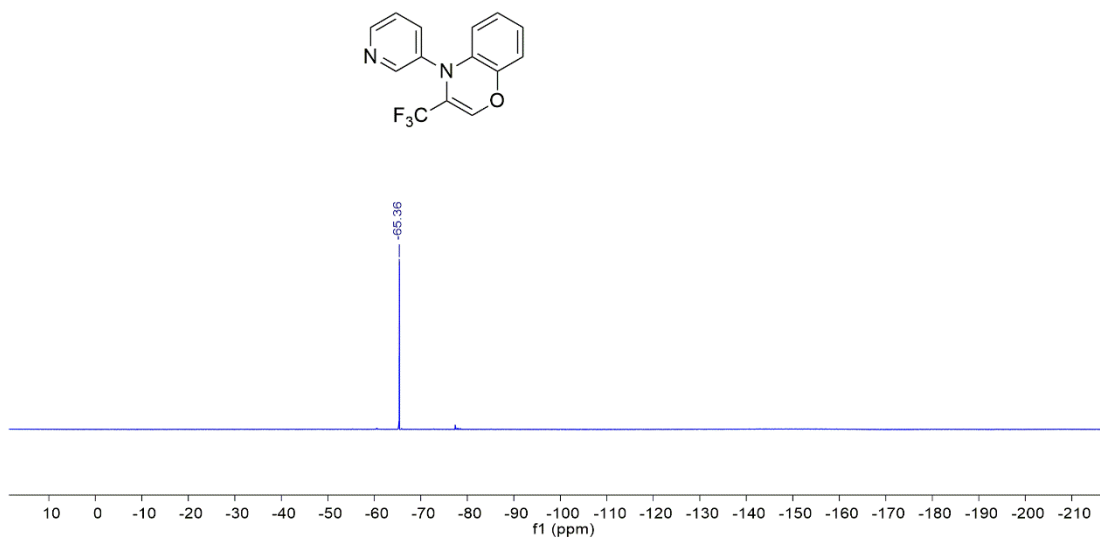

### <sup>1</sup>H-NMR spectrum of 3an

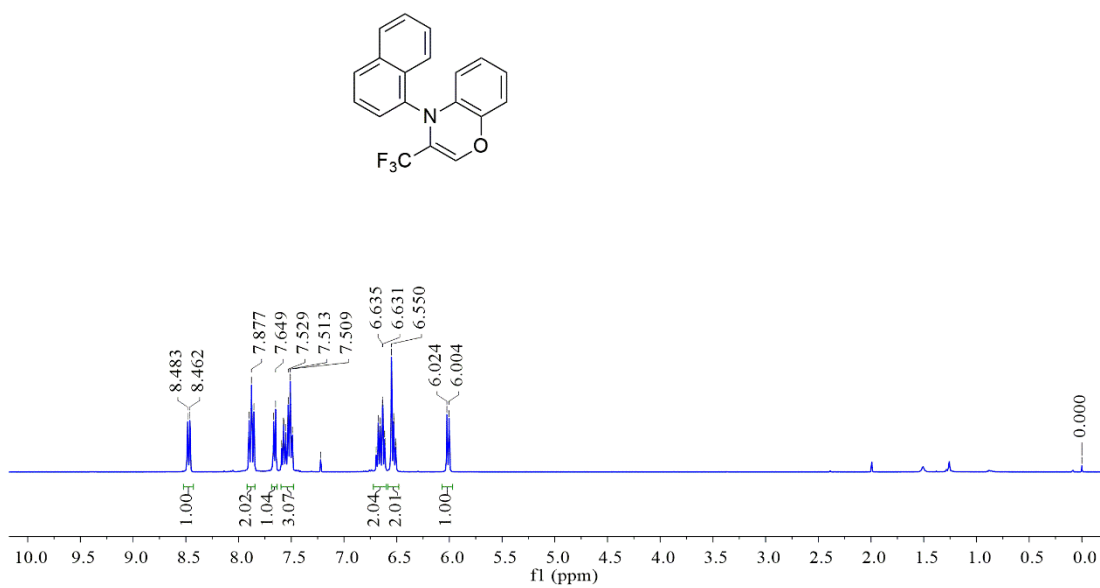

### <sup>13</sup>C-NMR spectrum of 3an

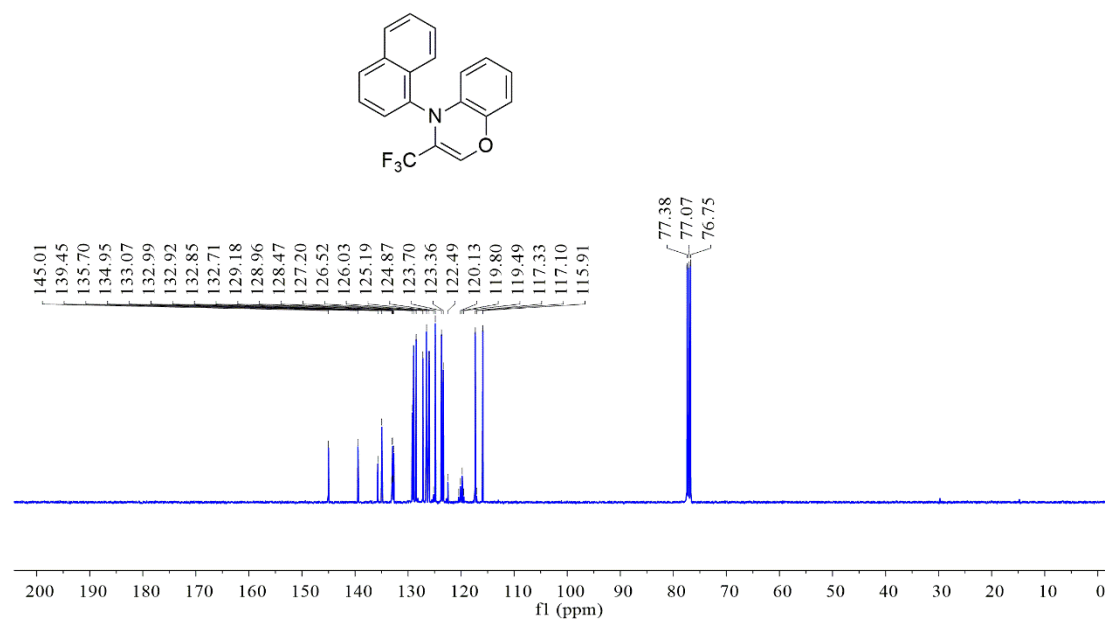

### <sup>19</sup>F-NMR spectrum of 3an

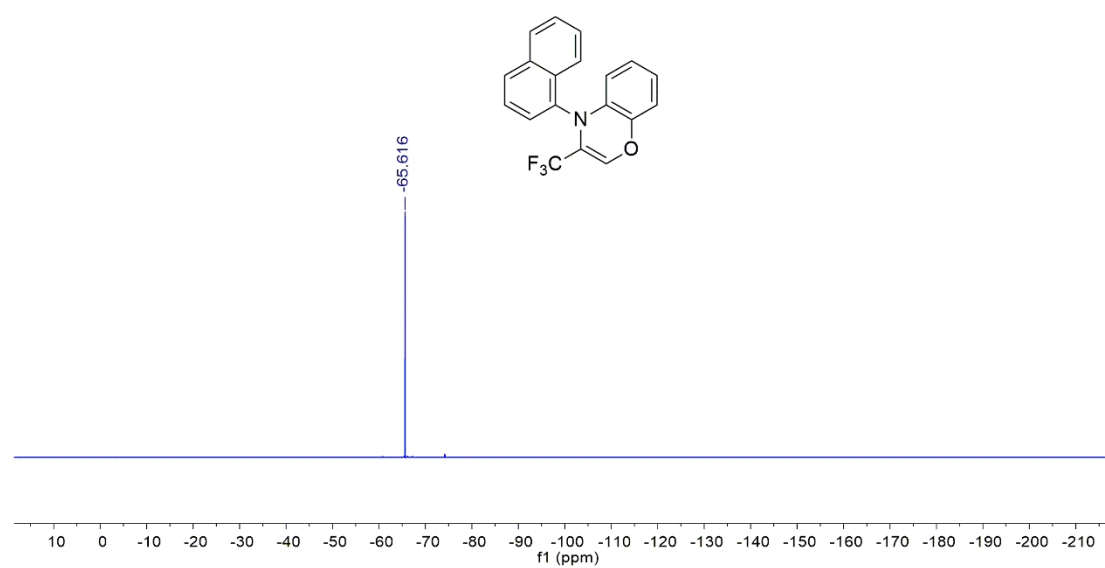

### <sup>1</sup>H-NMR spectrum of 3ao

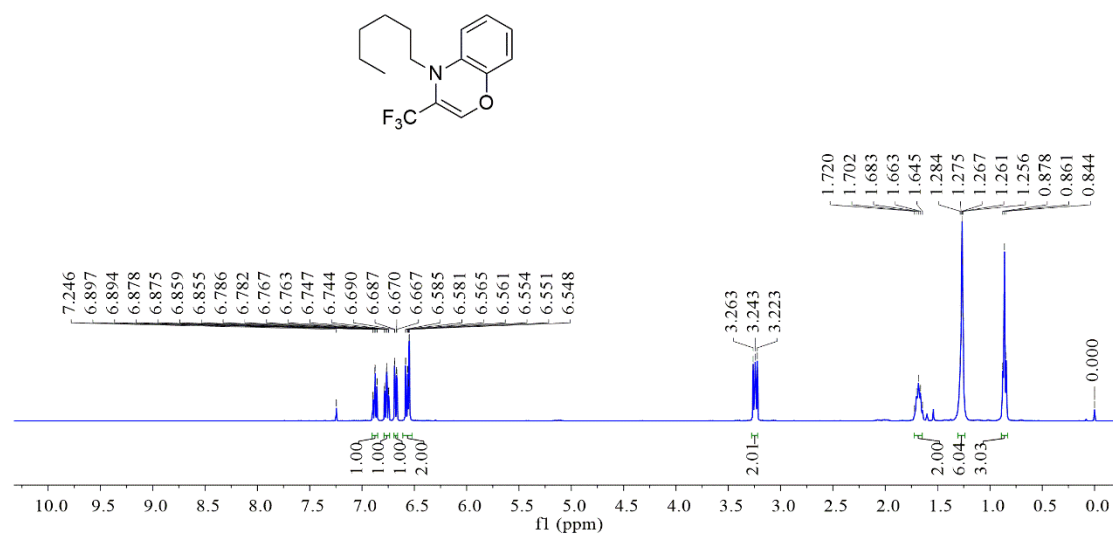

### <sup>13</sup>C-NMR spectrum of 3ao

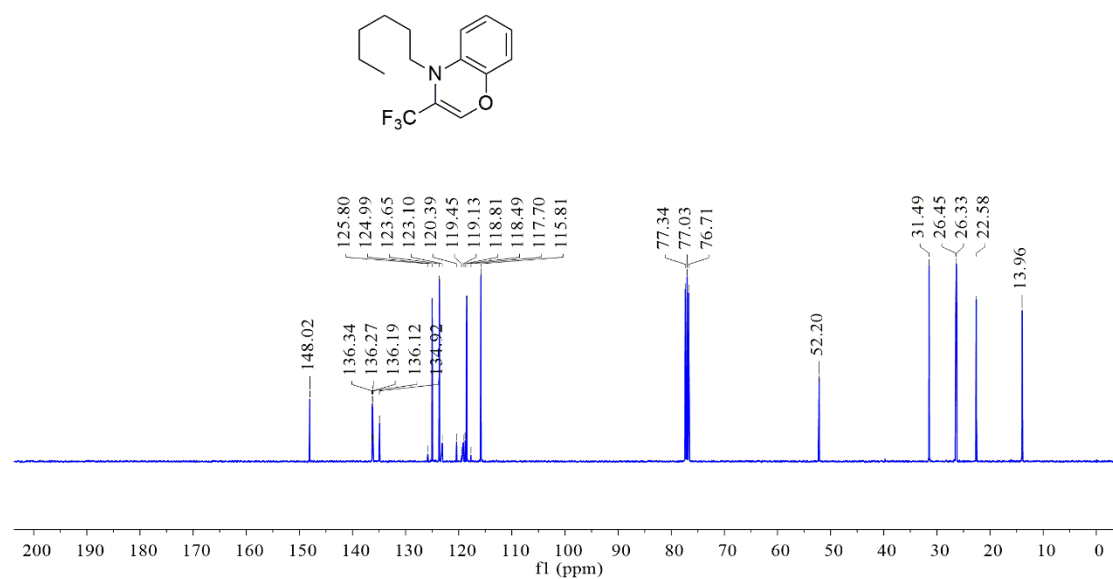

### <sup>19</sup>F-NMR spectrum of 3ao

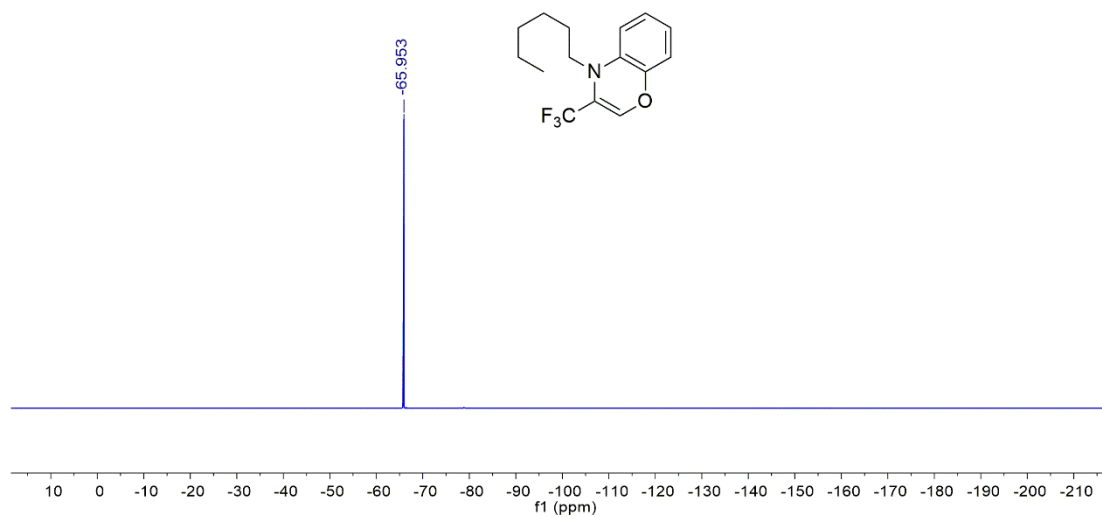

### <sup>1</sup>H-NMR spectrum of 3ba

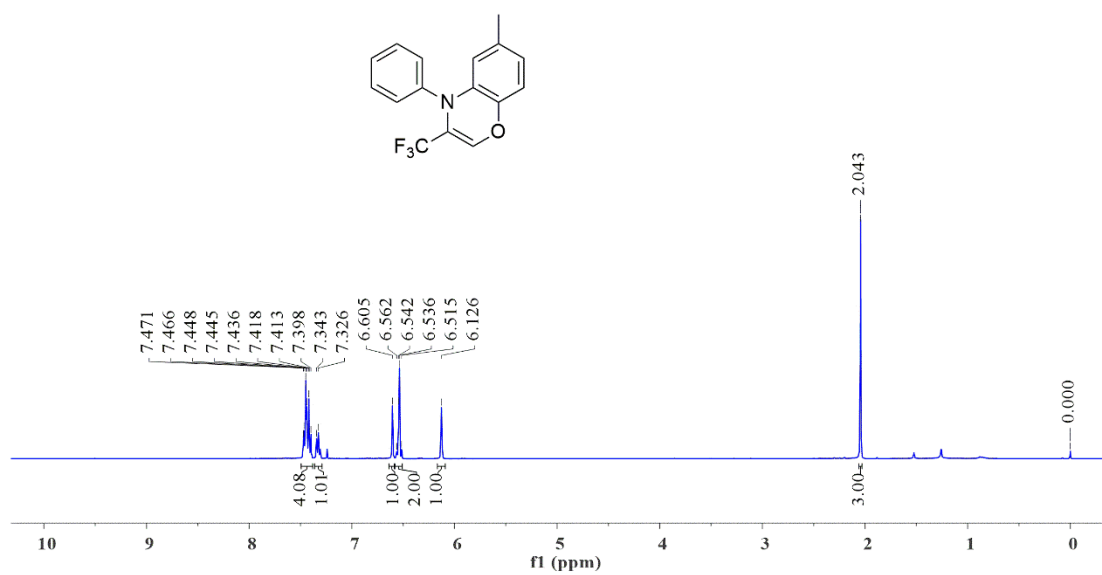

### <sup>13</sup>C-NMR spectrum of 3ba

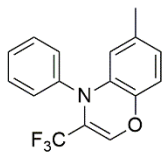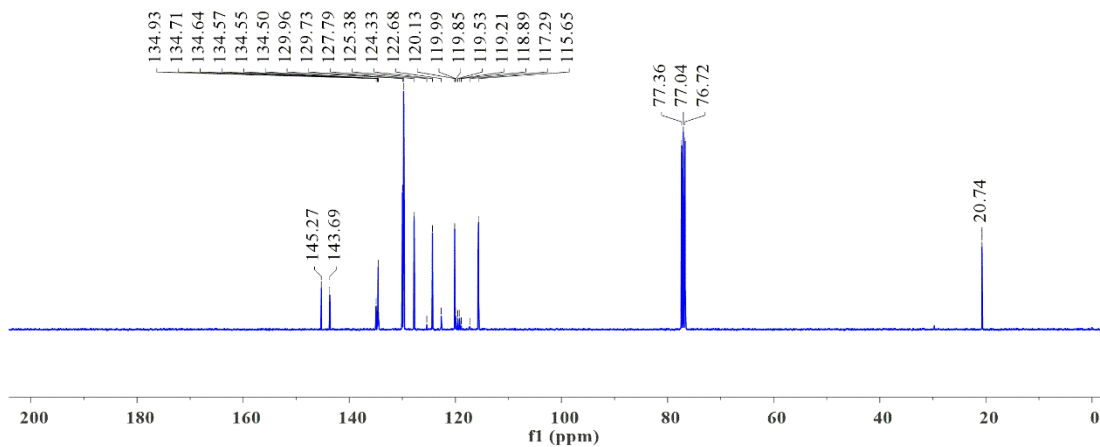

### <sup>19</sup>F-NMR spectrum of 3ba

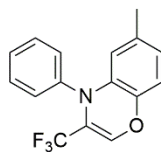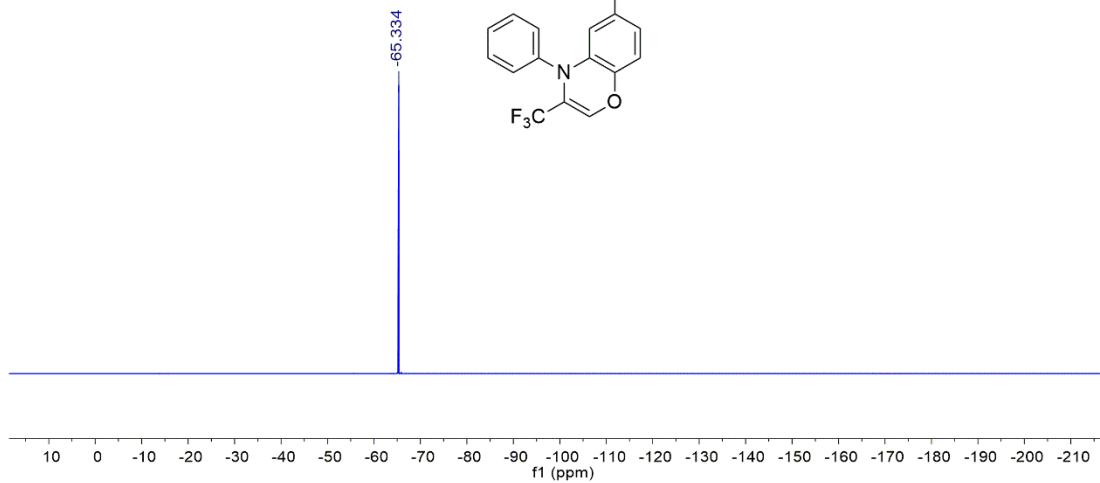

### <sup>1</sup>H-NMR spectrum of 3ca

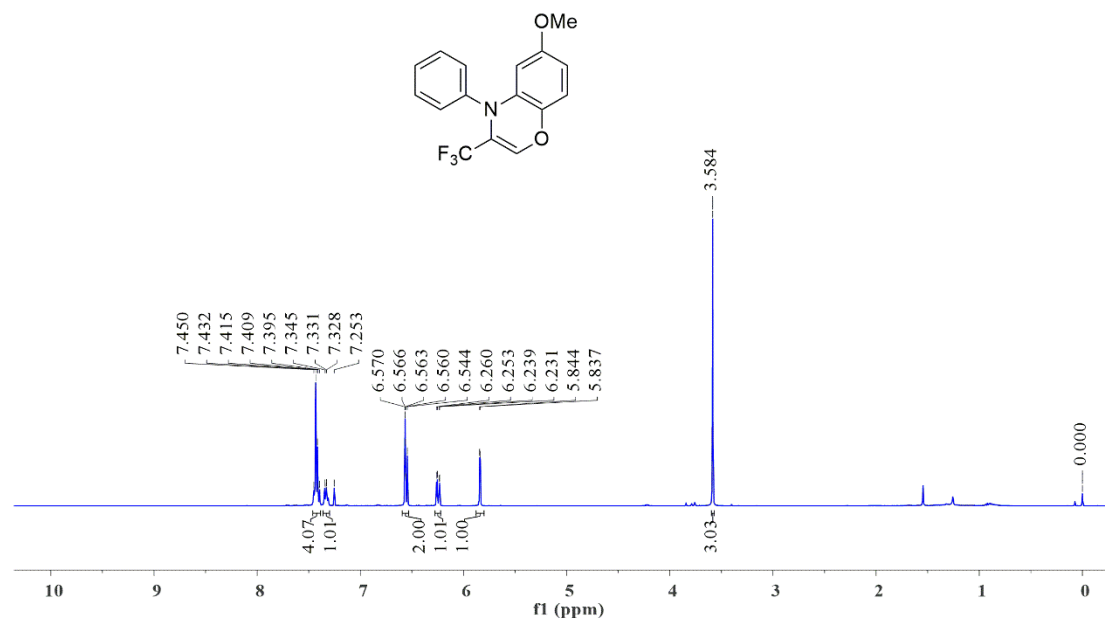

### <sup>13</sup>C-NMR spectrum of 3ca

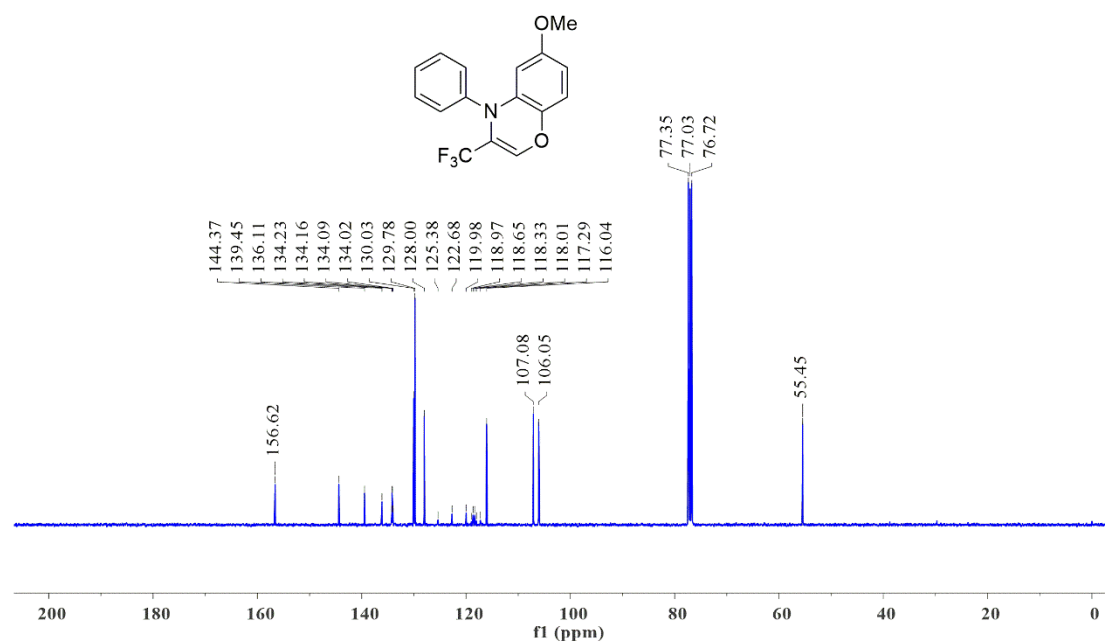

### <sup>19</sup>F-NMR spectrum of 3ca

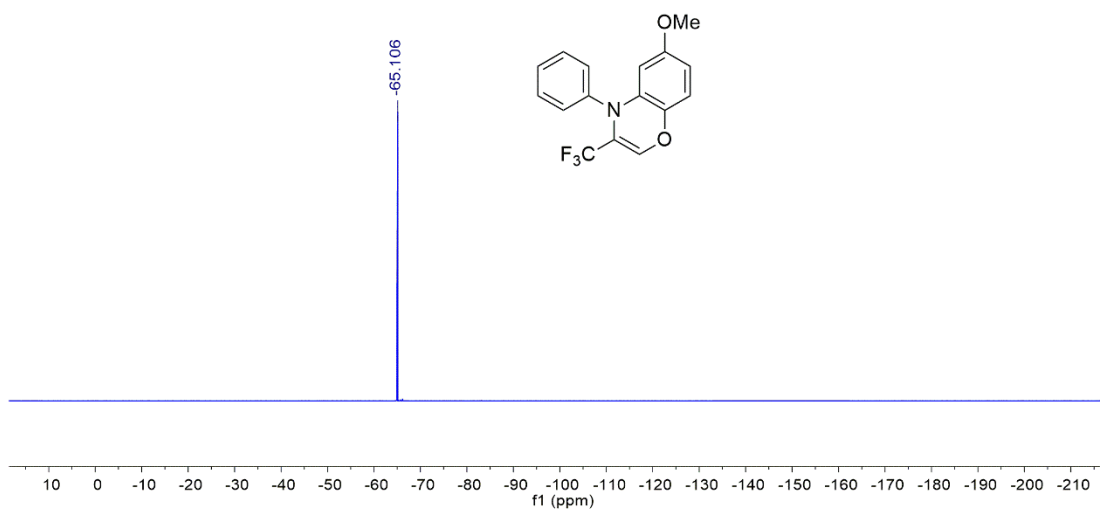

### <sup>1</sup>H-NMR spectrum of 3da

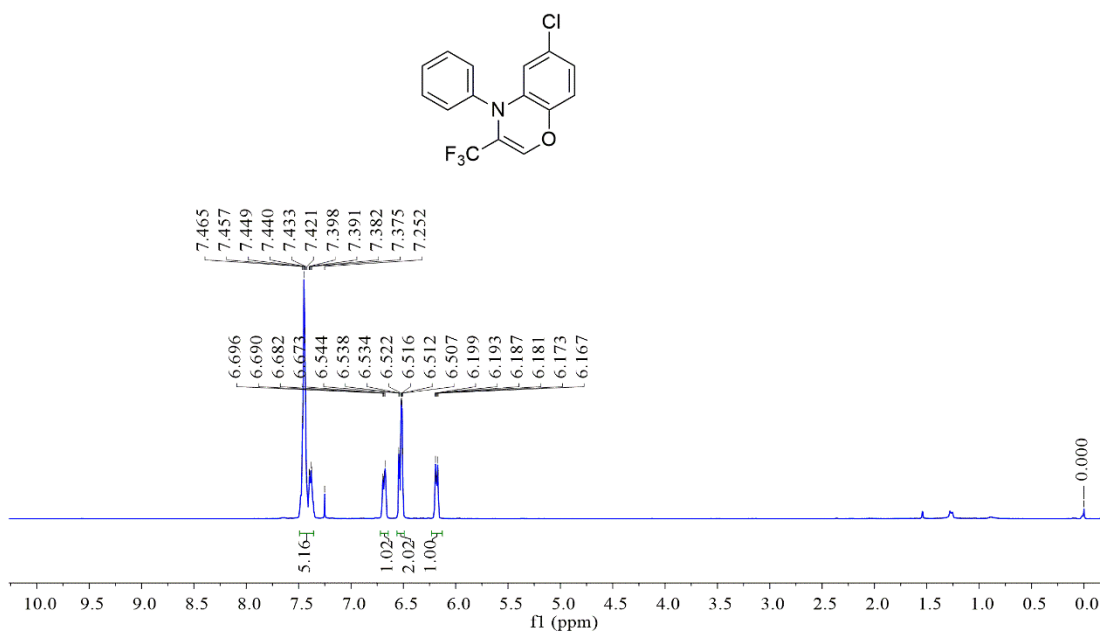



### <sup>13</sup>C-NMR spectrum of 3da

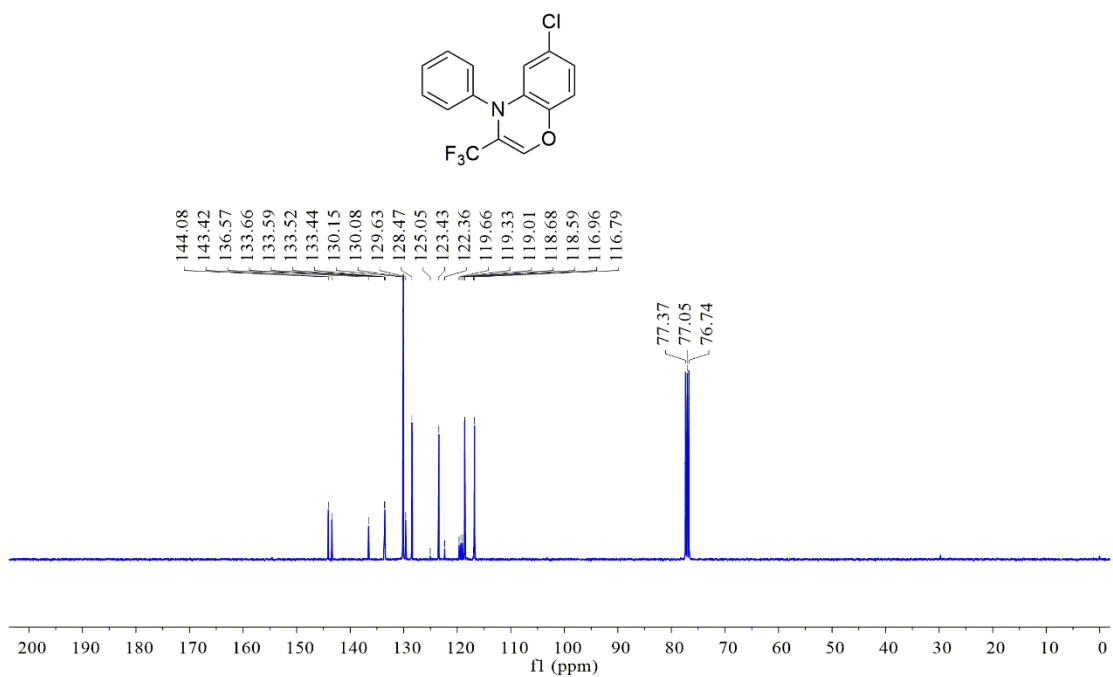

### <sup>19</sup>F-NMR spectrum of 3da

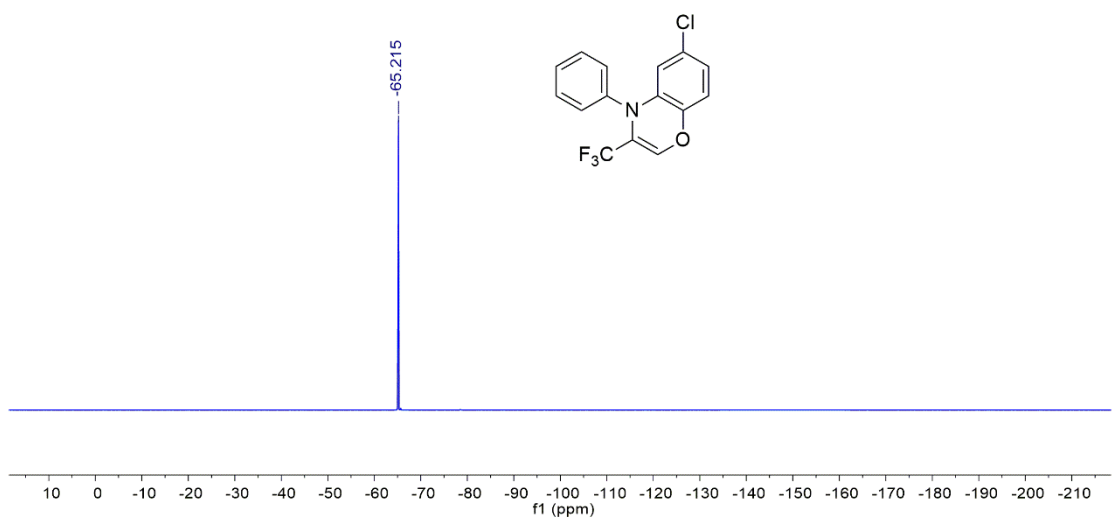

### <sup>1</sup>H-NMR spectrum of 3ea

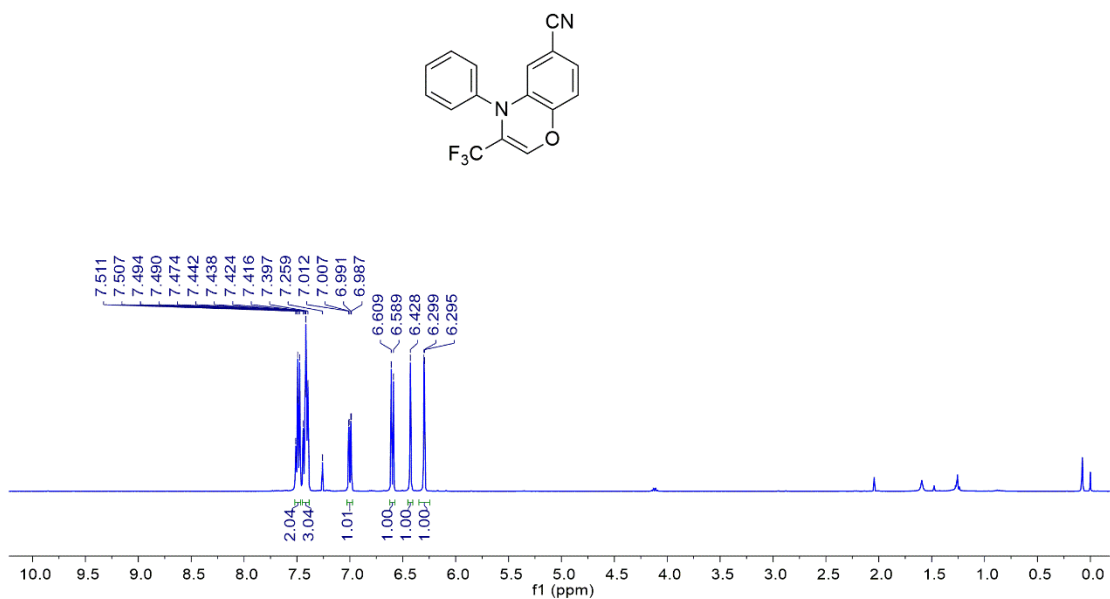

### <sup>13</sup>C-NMR spectrum of 3ea

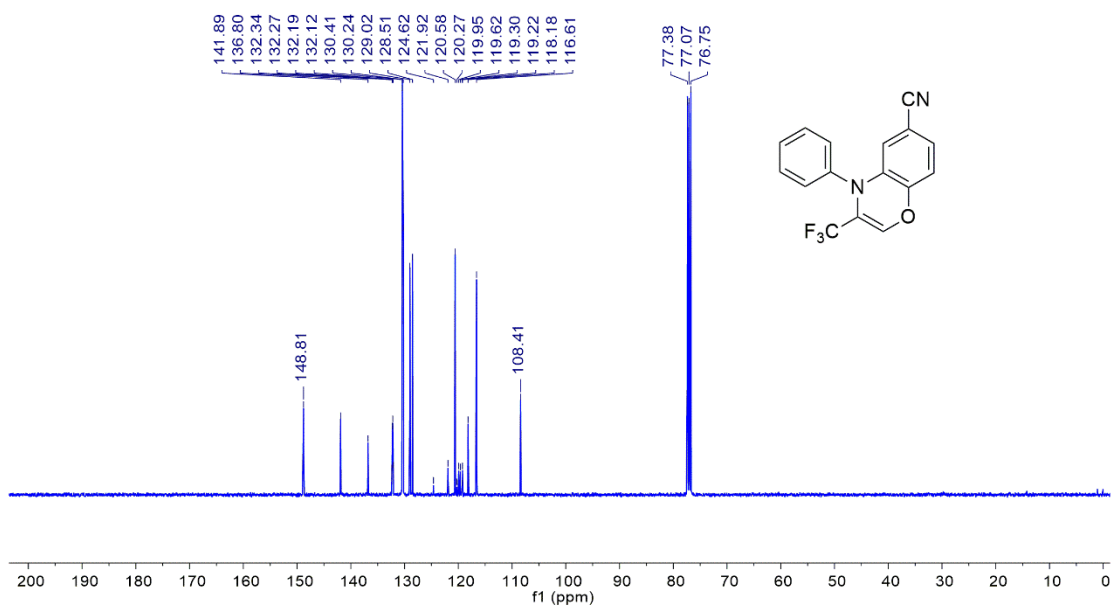

### <sup>19</sup>F-NMR spectrum of 3ea

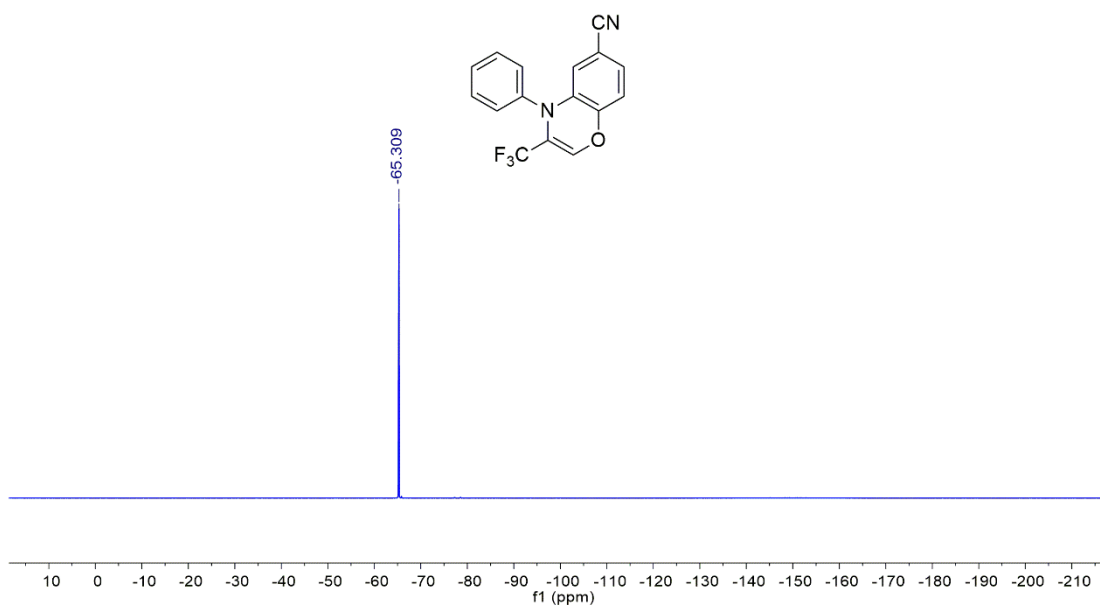

### <sup>1</sup>H-NMR spectrum of 3fa

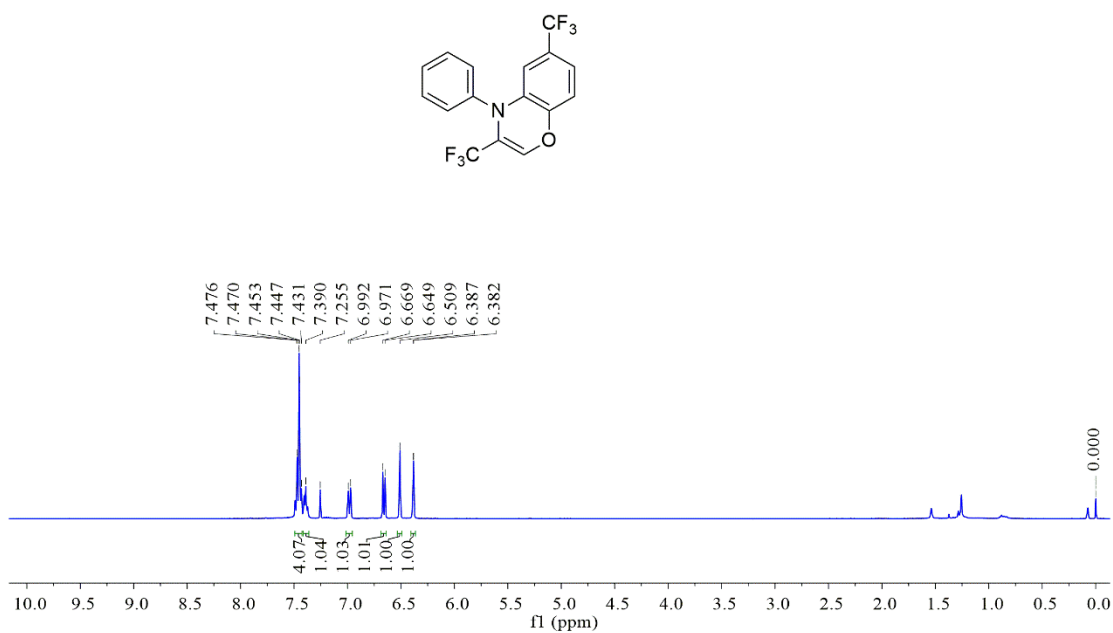

### <sup>13</sup>C-NMR spectrum of 3fa

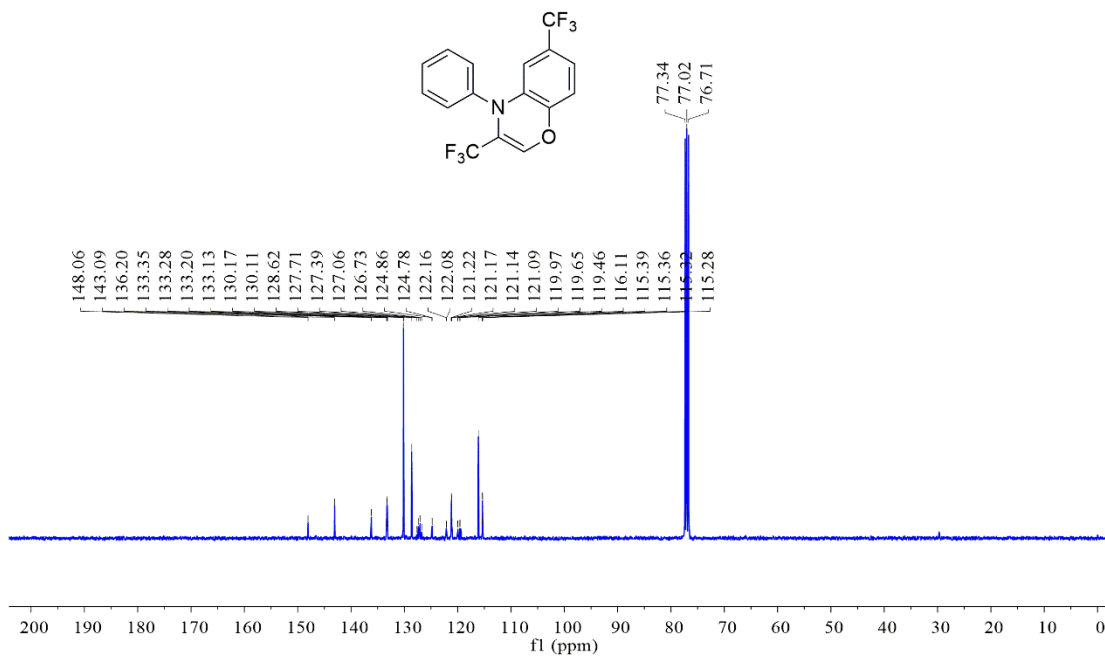

### <sup>19</sup>F-NMR spectrum of 3fa

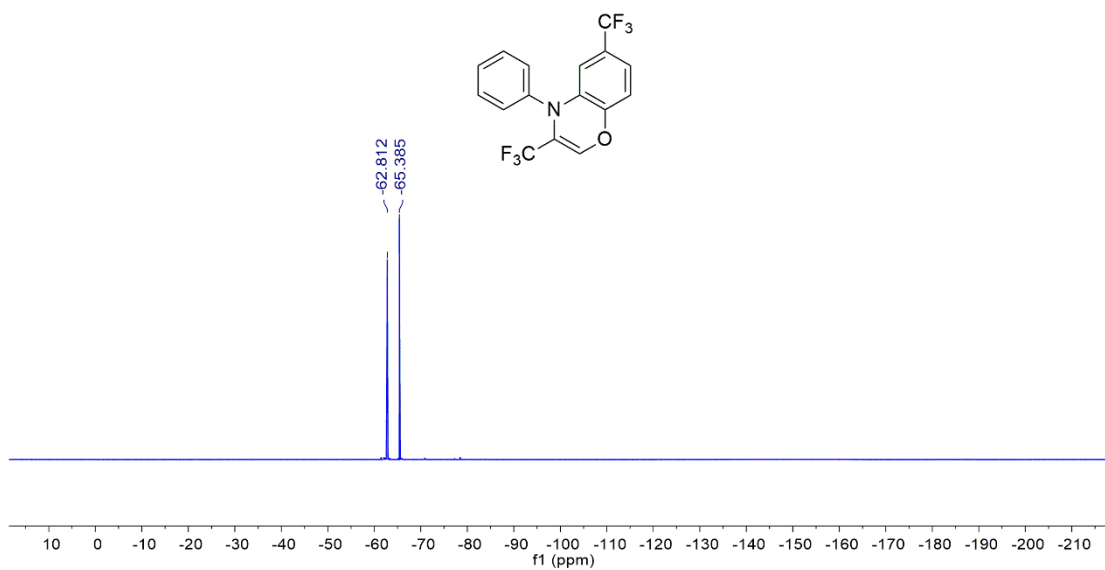

### <sup>1</sup>H-NMR spectrum of 3ga

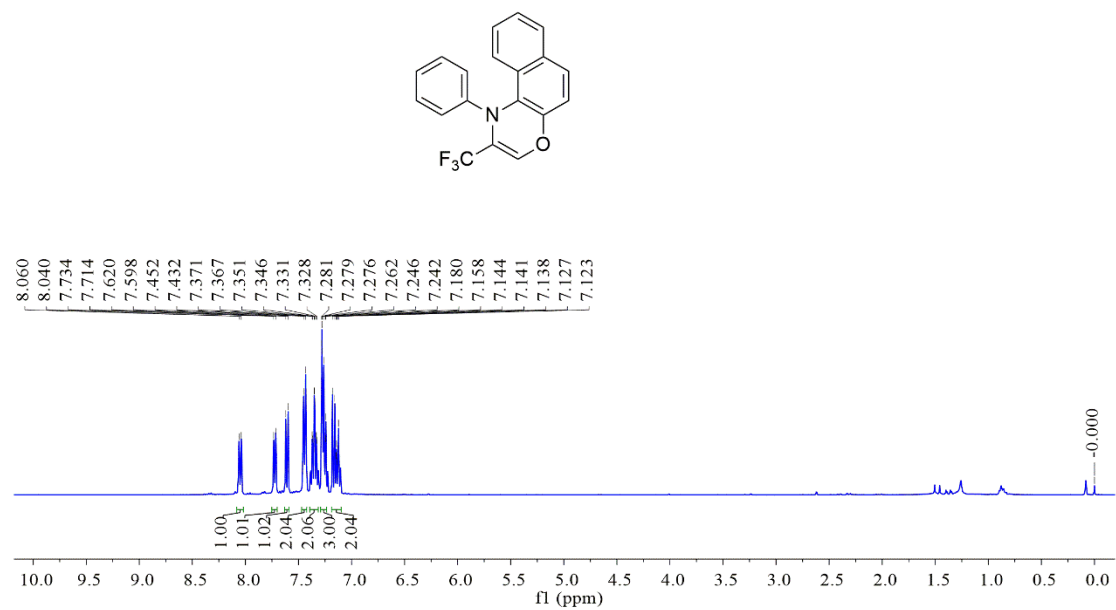

### <sup>13</sup>C-NMR spectrum of 3ga

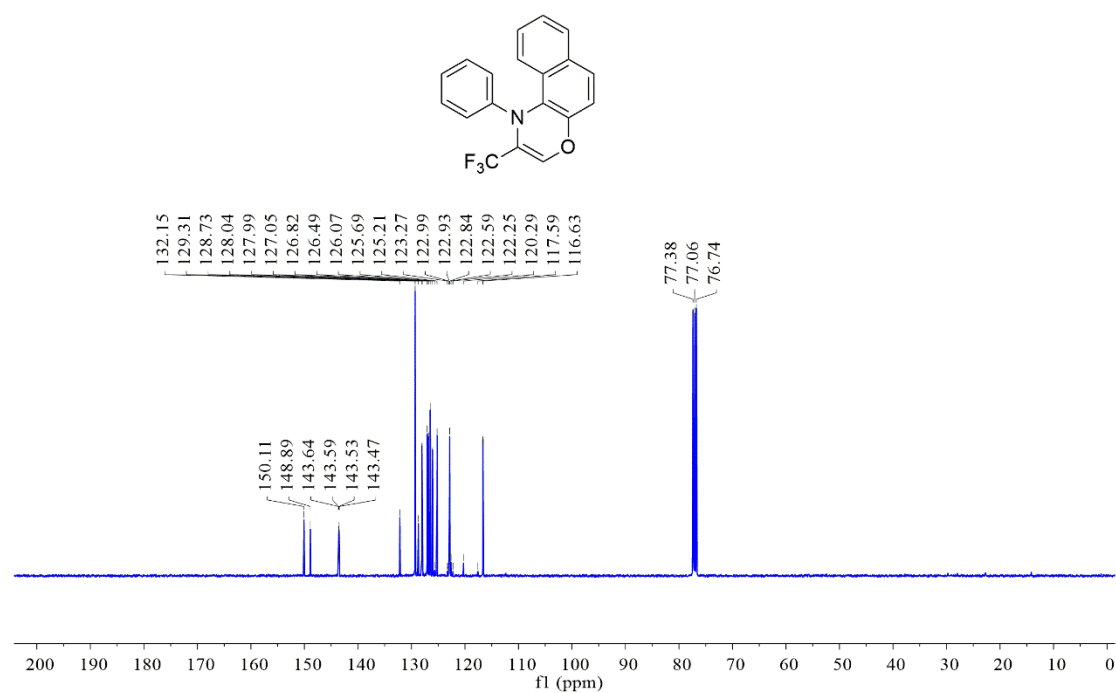

### <sup>19</sup>F-NMR spectrum of 3ga

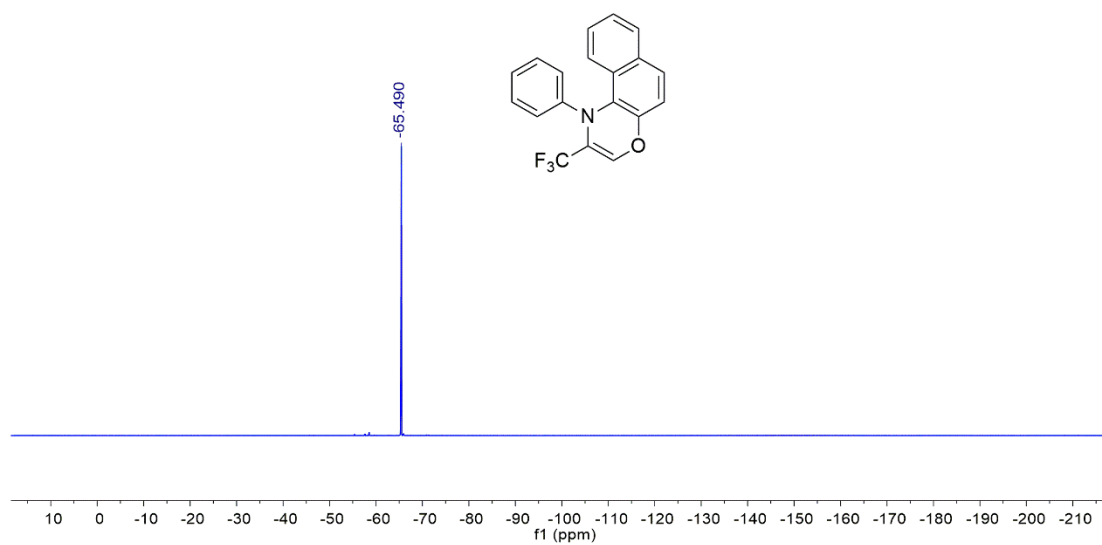

### <sup>1</sup>H-NMR spectrum of 3ha

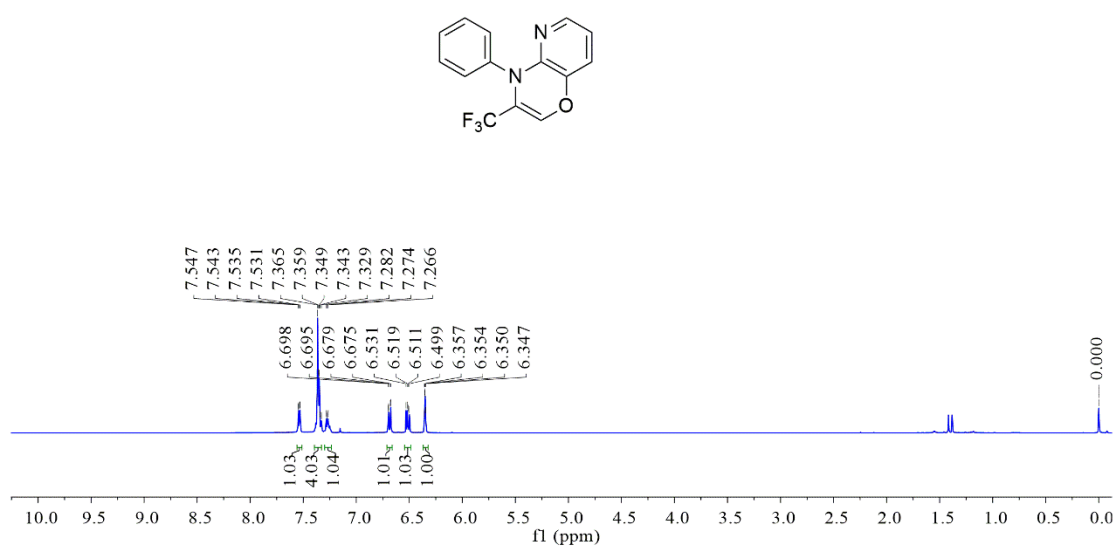

### <sup>13</sup>C-NMR spectrum of 3ha

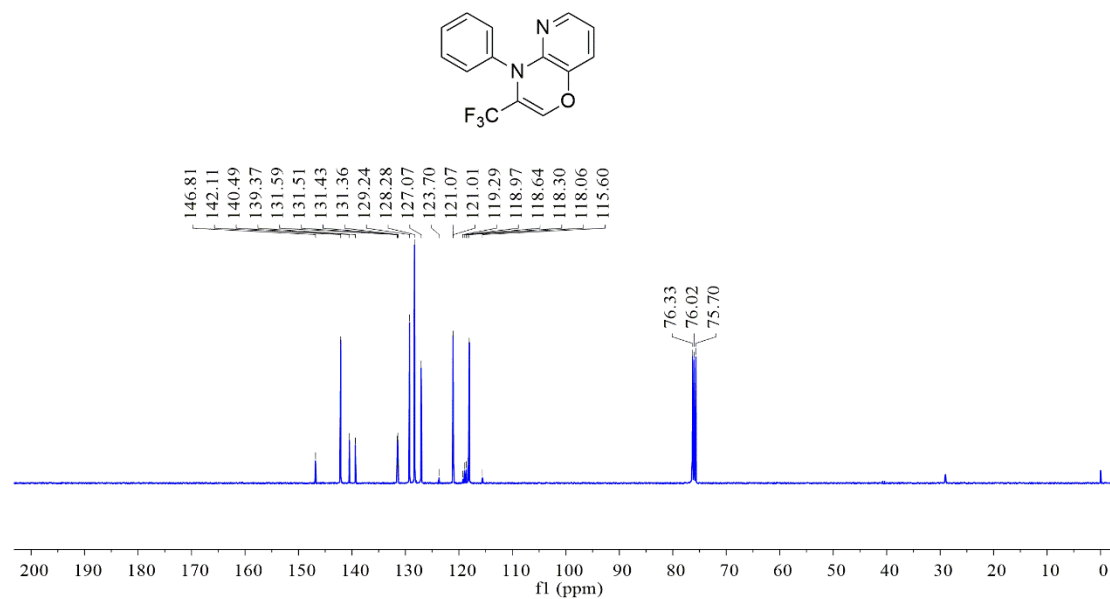

### <sup>19</sup>F-NMR spectrum of 3ha

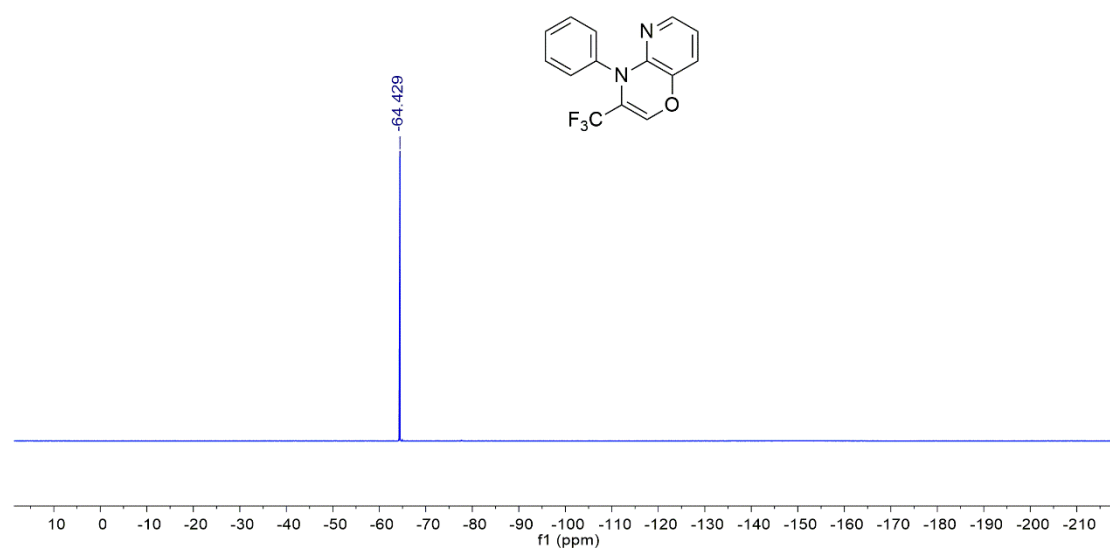

### <sup>1</sup>H-NMR spectrum of 3fb

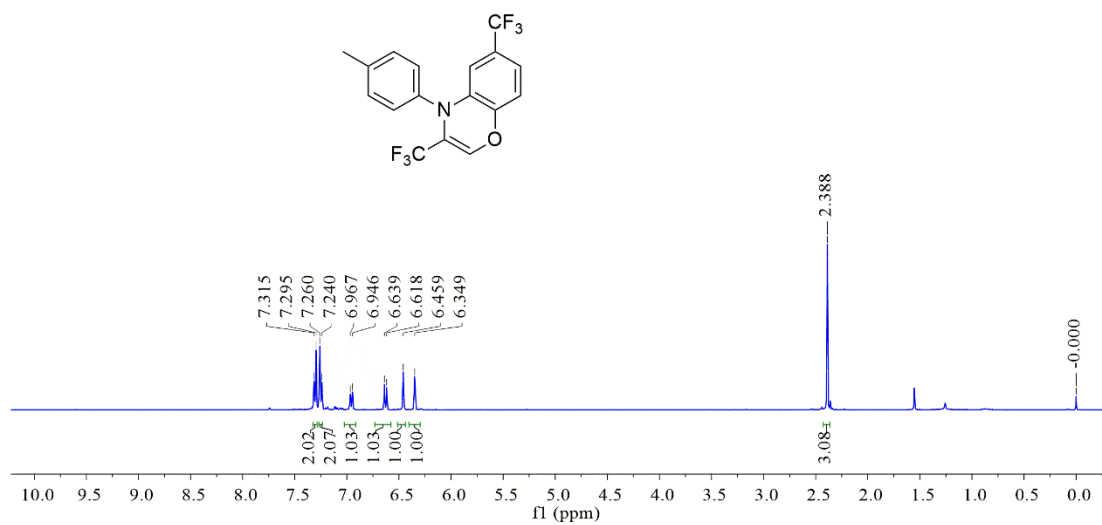

### <sup>13</sup>C-NMR spectrum of 3fb

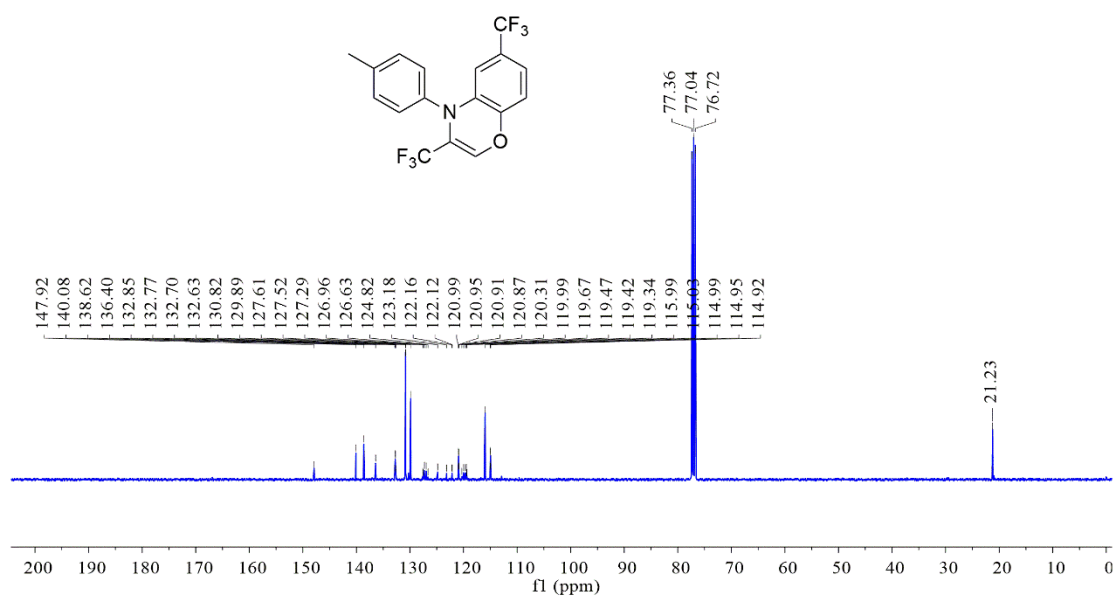



### <sup>19</sup>F-NMR spectrum of 3fb

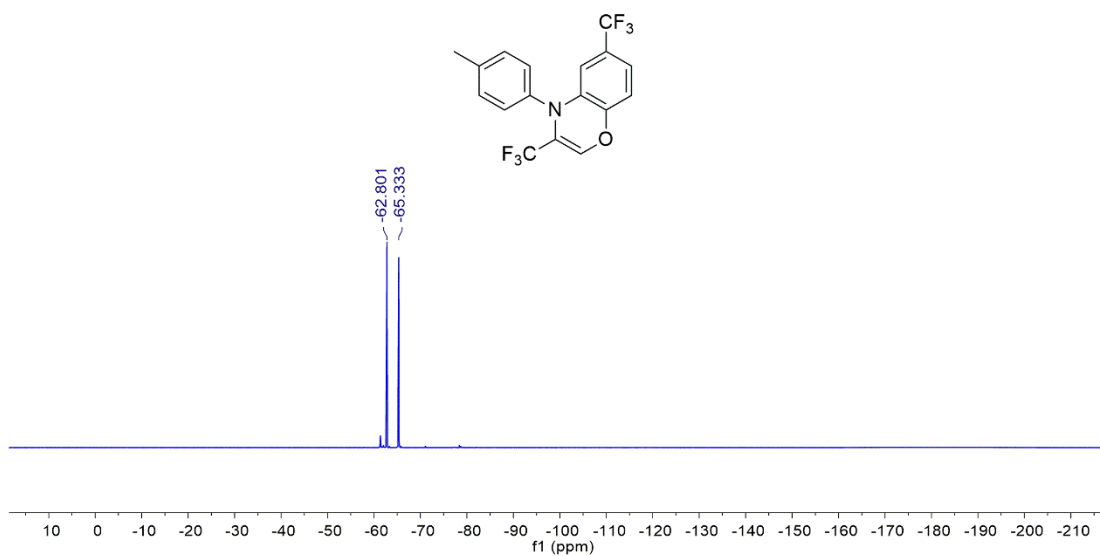

### <sup>1</sup>H-NMR spectrum of 3be

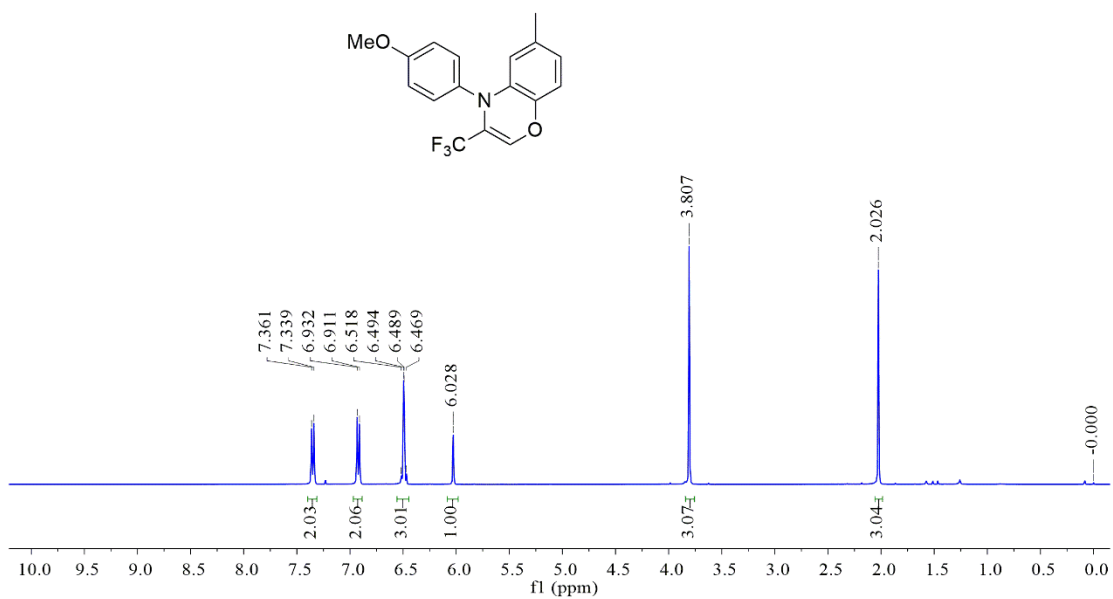

### <sup>13</sup>C-NMR spectrum of 3be

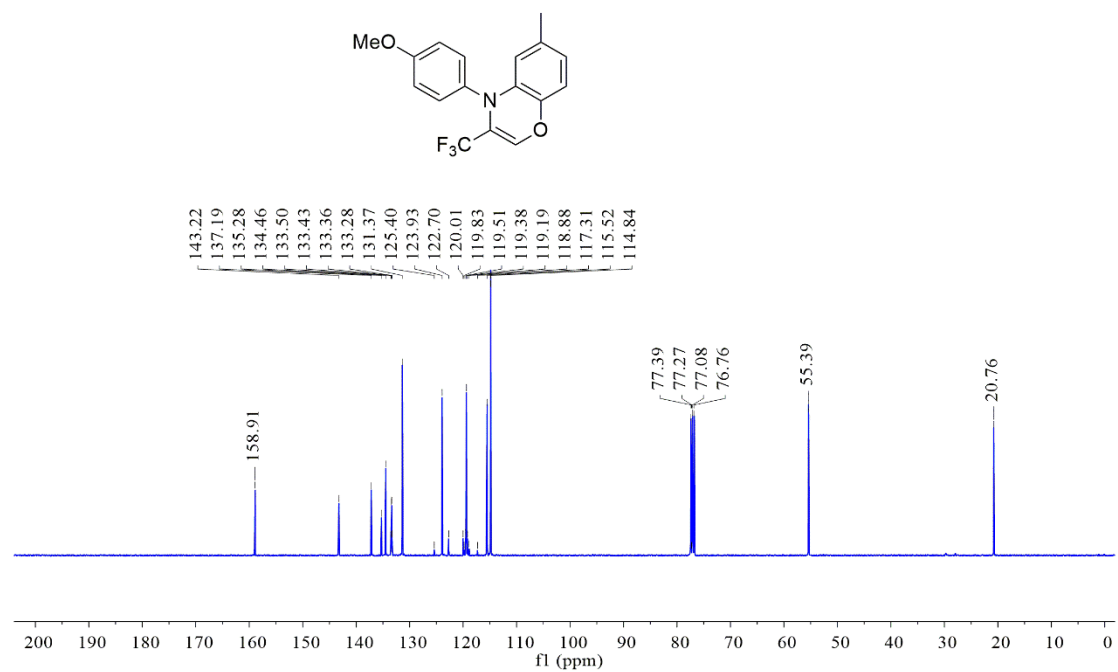

### <sup>19</sup>F-NMR spectrum of 3be

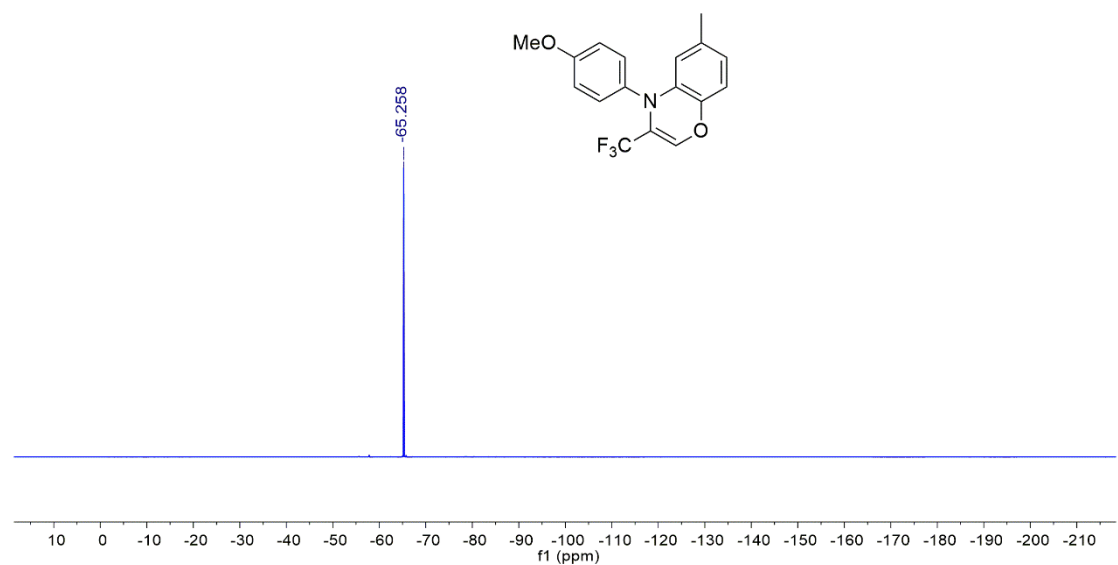

### <sup>1</sup>H-NMR spectrum of 3bf

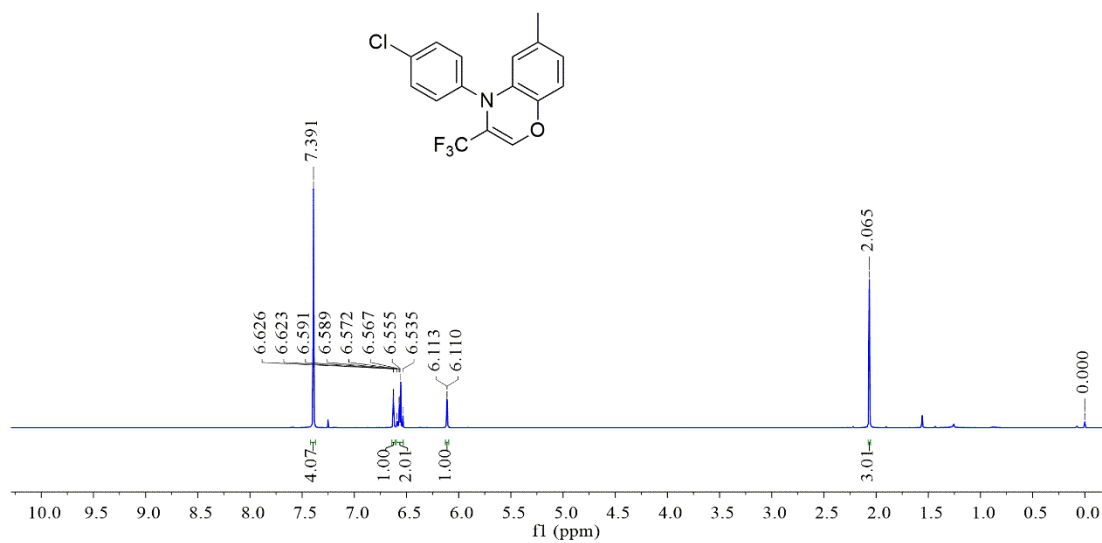

### <sup>13</sup>C-NMR spectrum of 3bf

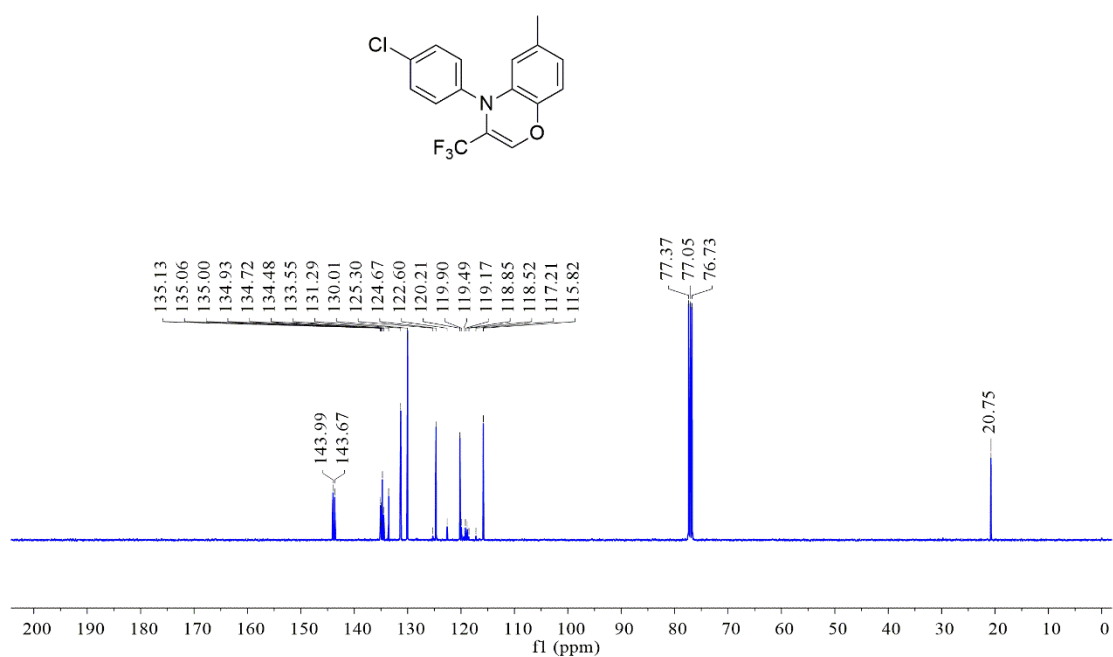

### <sup>19</sup>F-NMR spectrum of 3bf

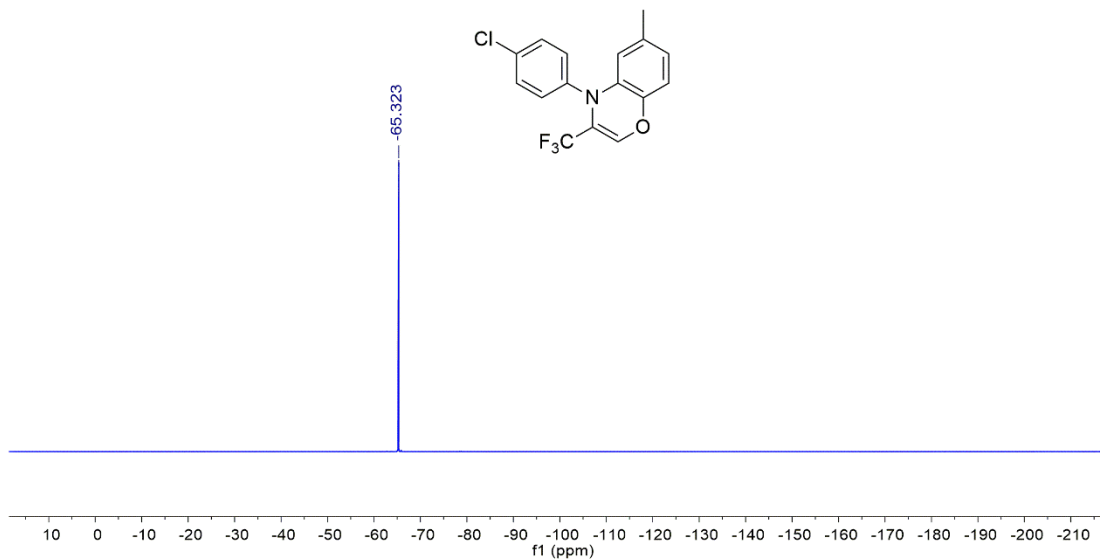

### <sup>1</sup>H-NMR spectrum of 3ia

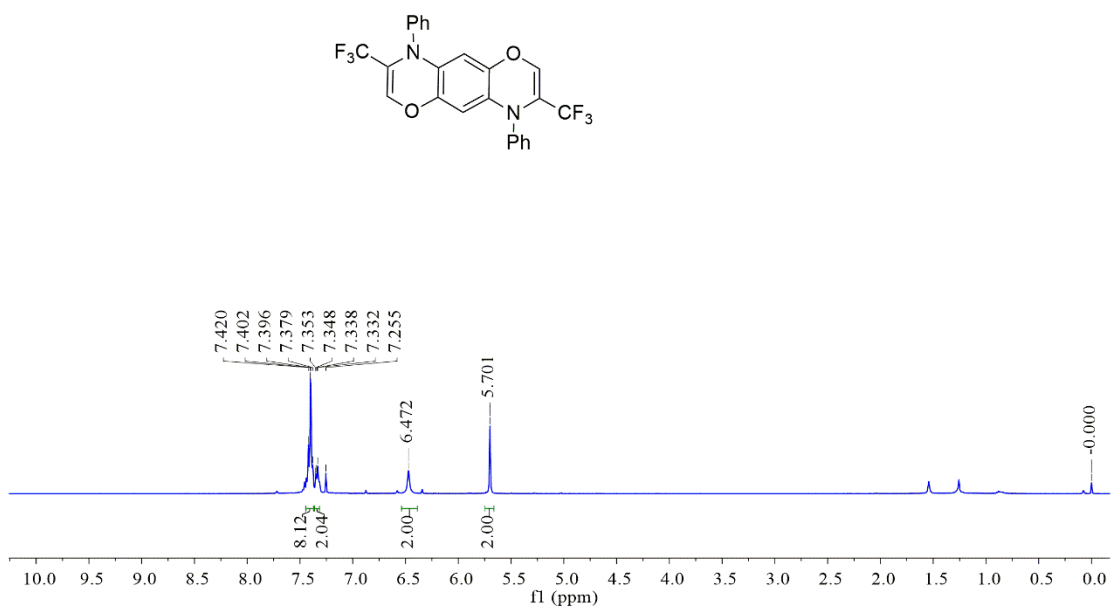

### <sup>13</sup>C-NMR spectrum of 3ia

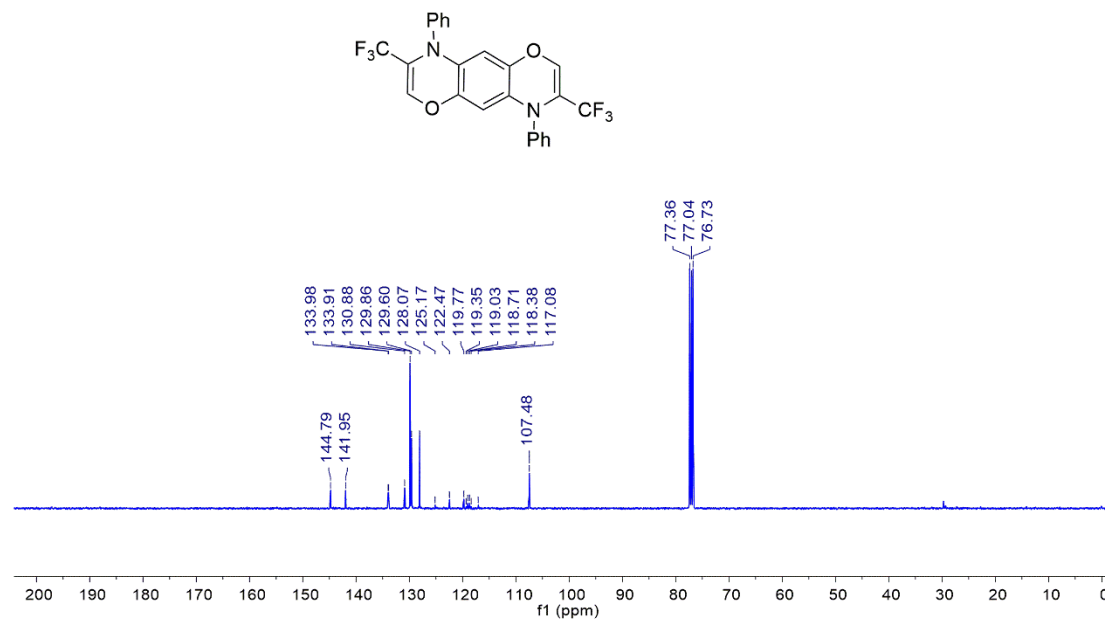

### <sup>19</sup>F-NMR spectrum of 3ia

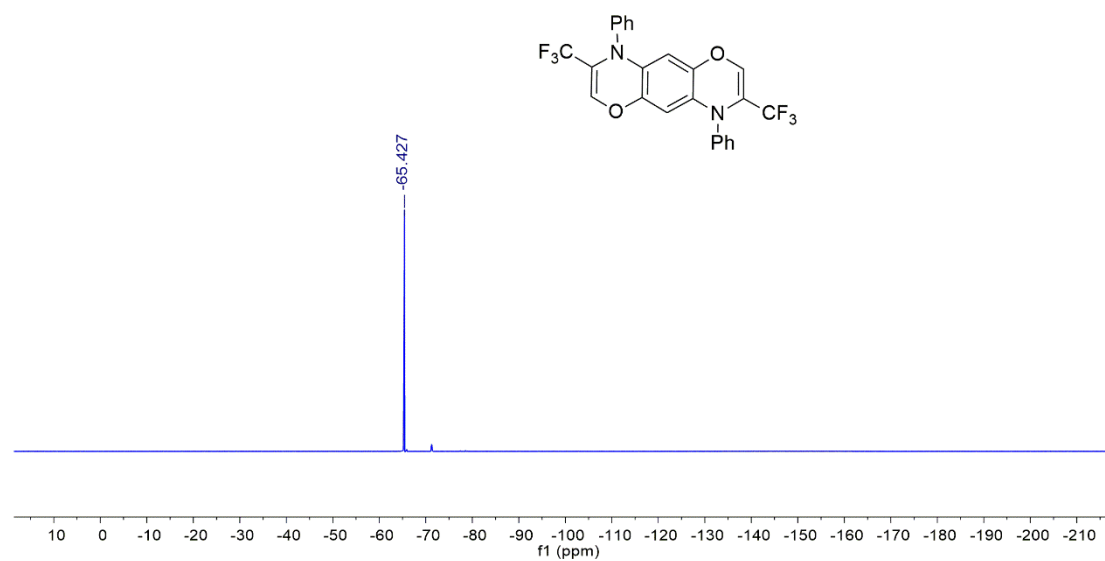

### <sup>1</sup>H-NMR spectrum of 3ja

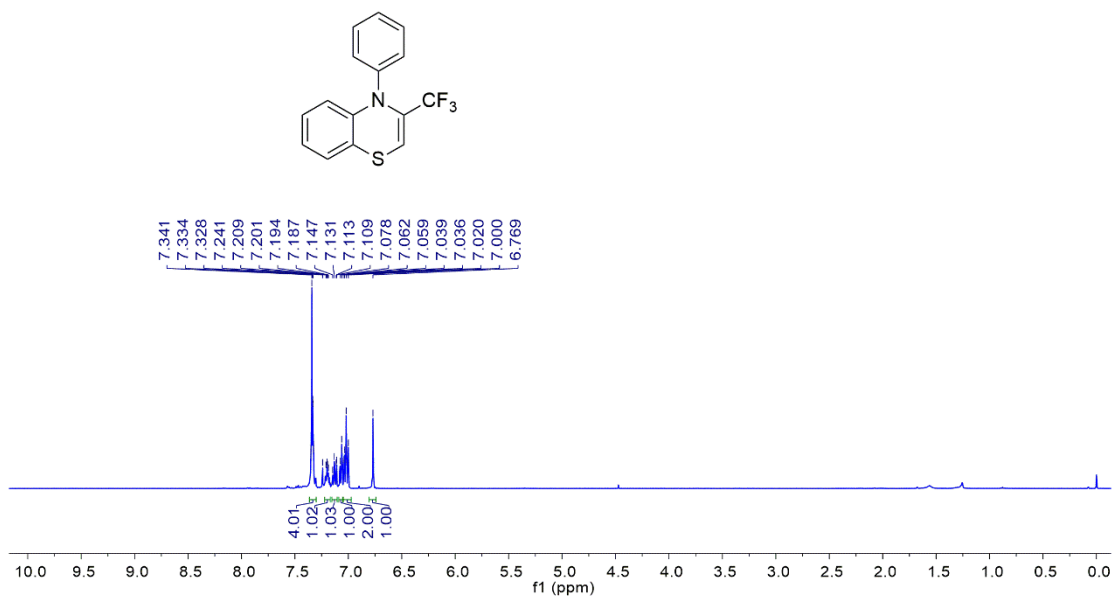

### <sup>13</sup>C-NMR spectrum of 3ja

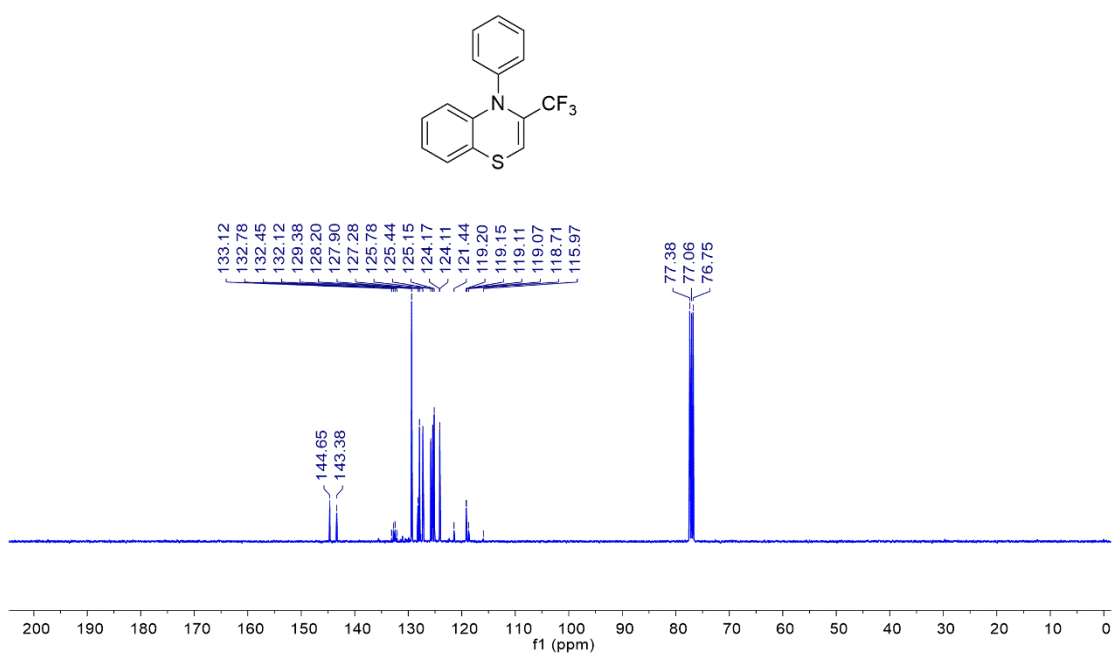

### <sup>19</sup>F-NMR spectrum of 3ja

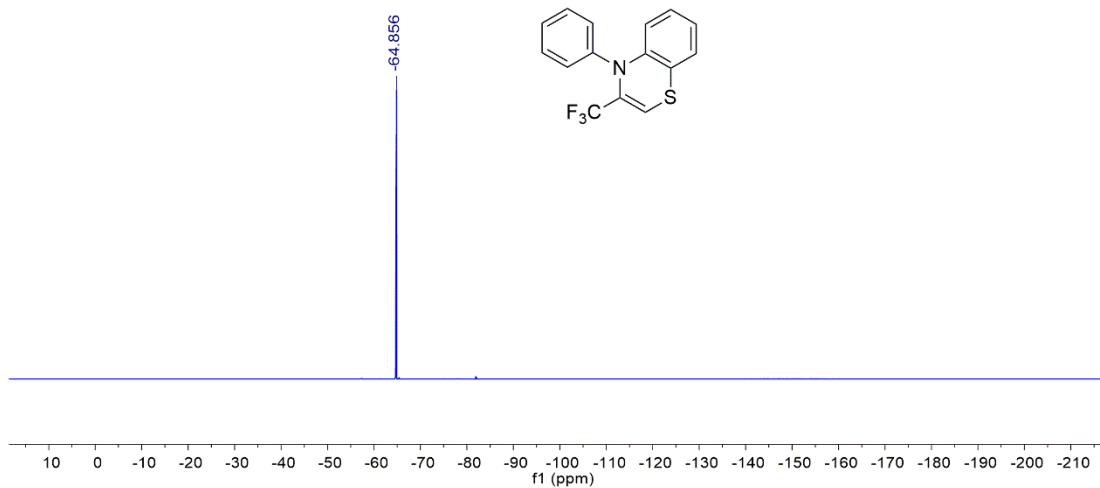

### <sup>1</sup>H-NMR spectrum of 3ka

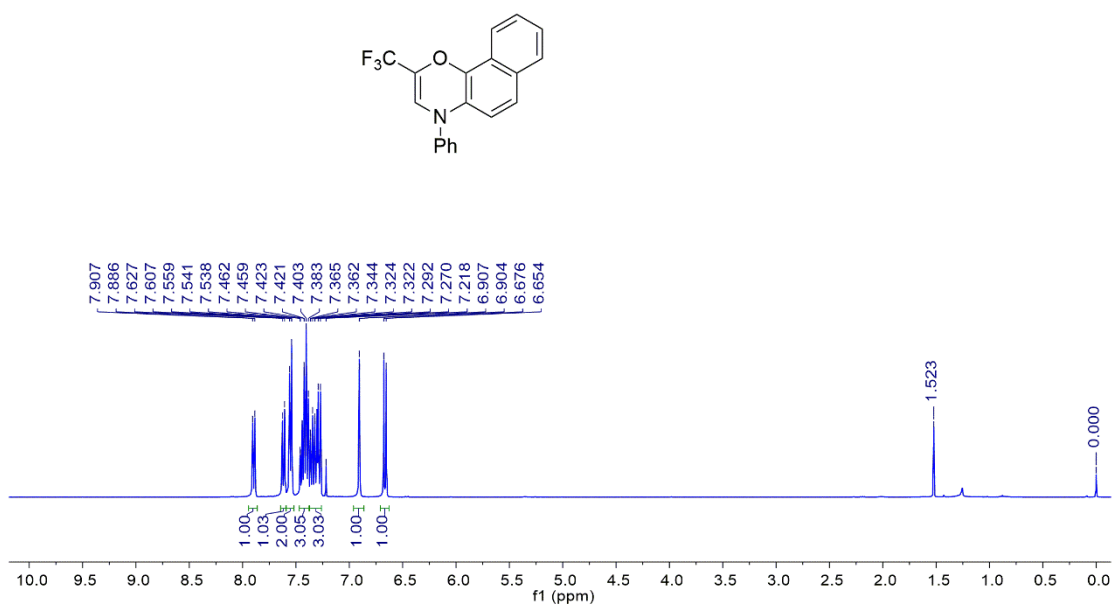

### <sup>13</sup>C-NMR spectrum of 3ka

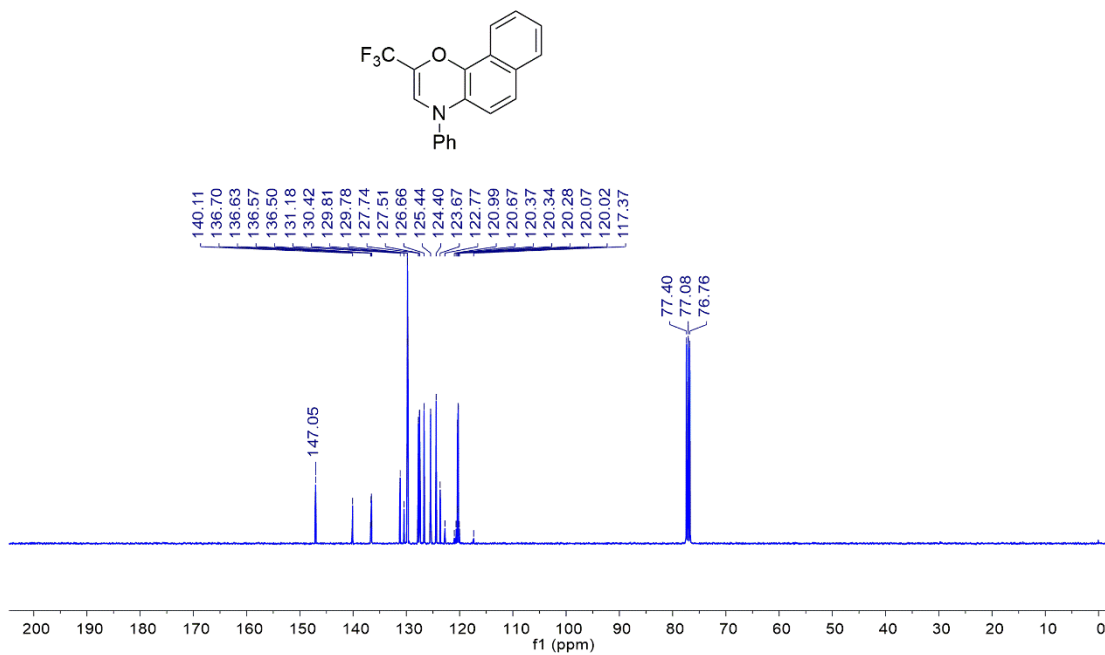

### <sup>19</sup>F-NMR spectrum of 3ka

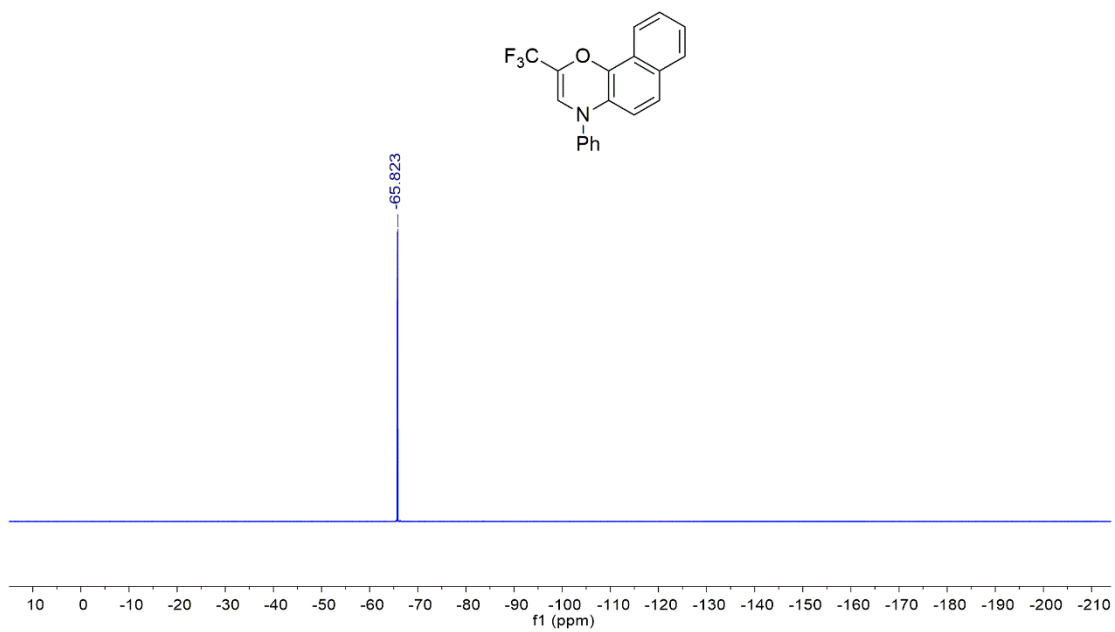



### <sup>1</sup>H-NMR spectrum of 3la

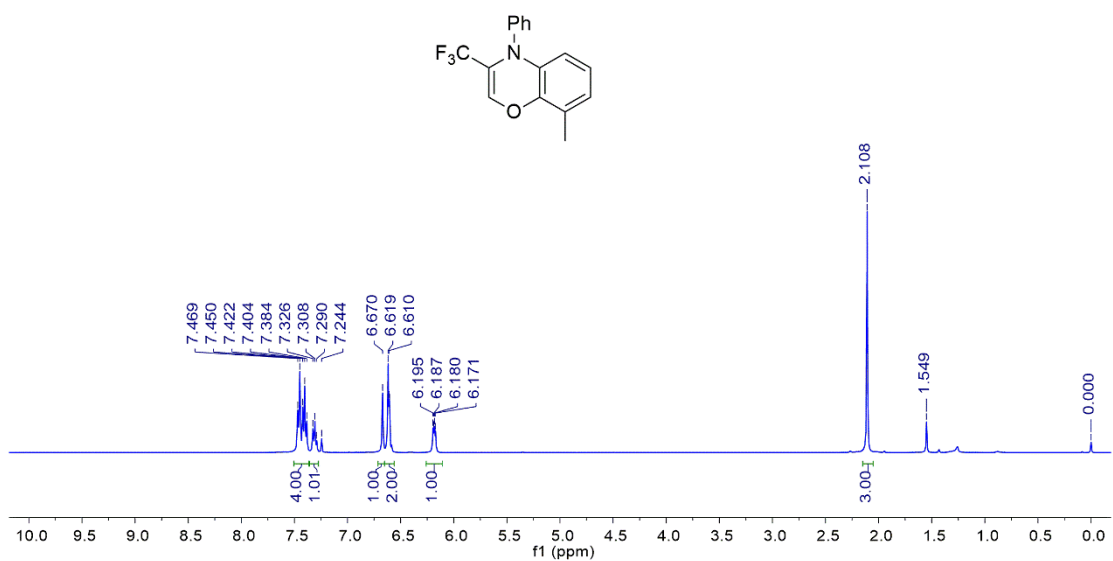

### <sup>13</sup>C-NMR spectrum of 3la

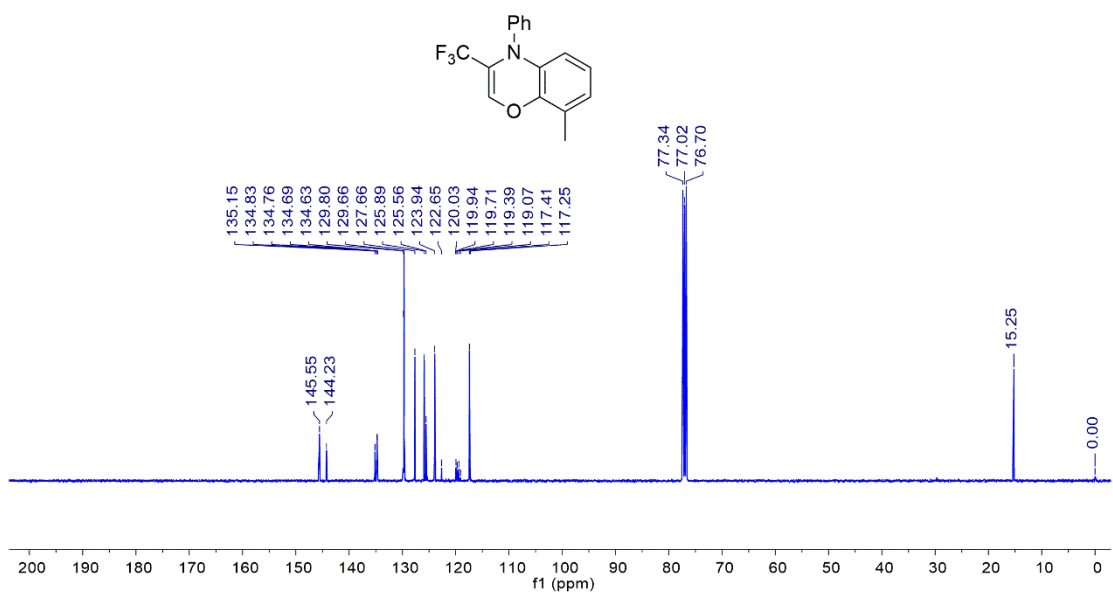

### <sup>19</sup>F-NMR spectrum of 3a

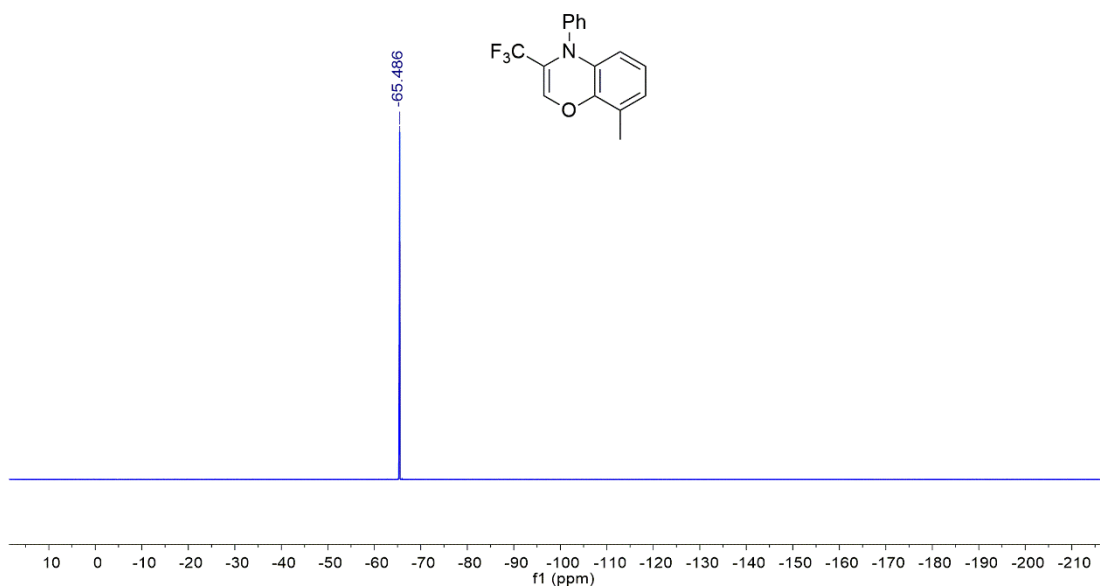

### <sup>1</sup>H-NMR spectrum of 4a

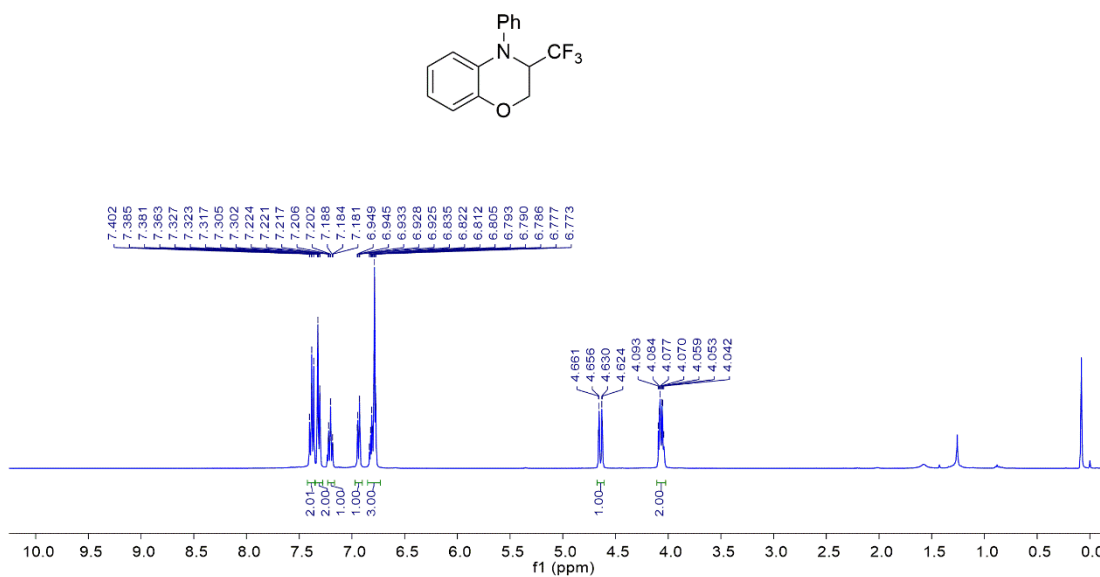

### <sup>13</sup>C-NMR spectrum of 4a

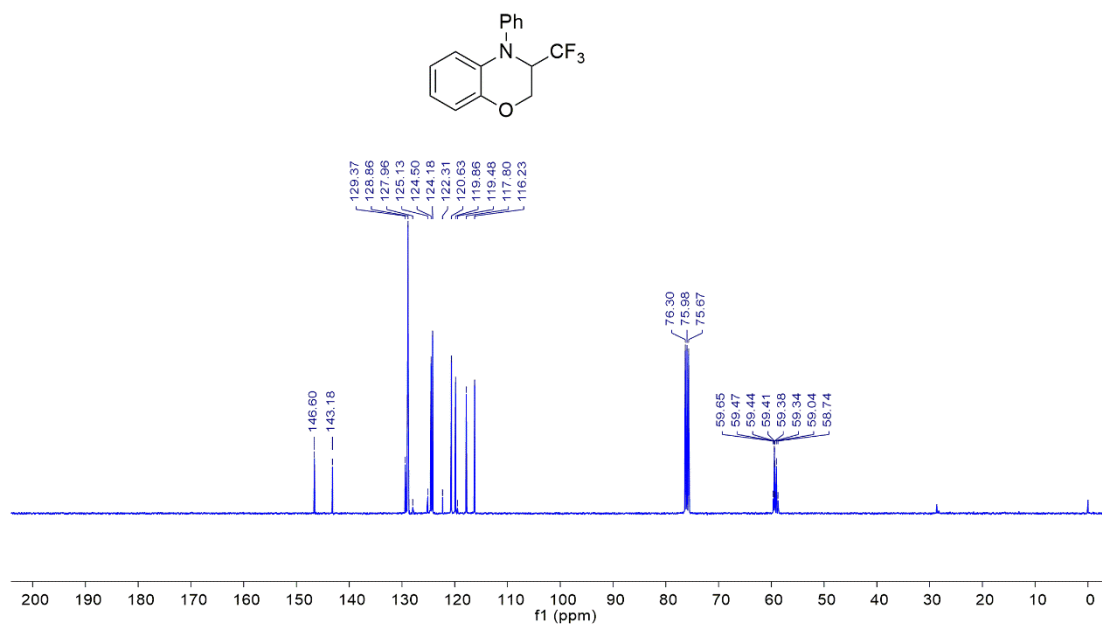

### <sup>19</sup>F-NMR spectrum of 4a

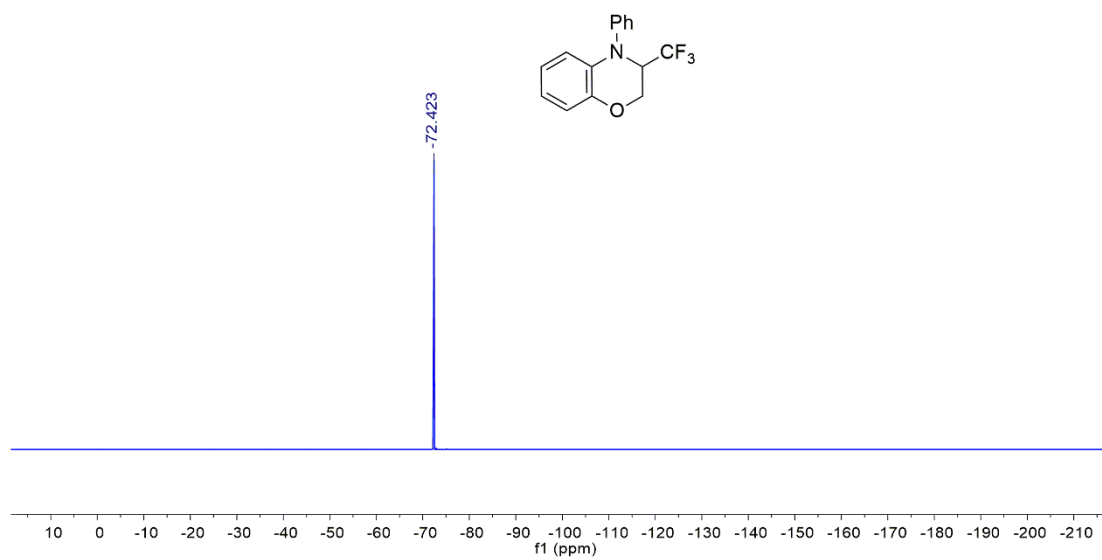

### <sup>1</sup>H-NMR spectrum of 5a

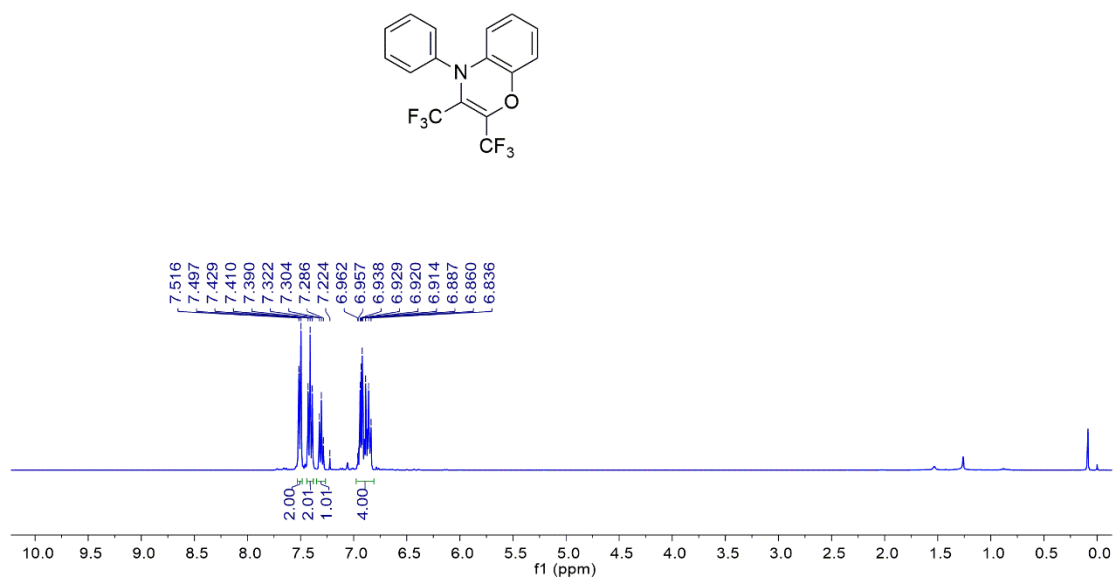

### <sup>13</sup>C-NMR spectrum of 5a

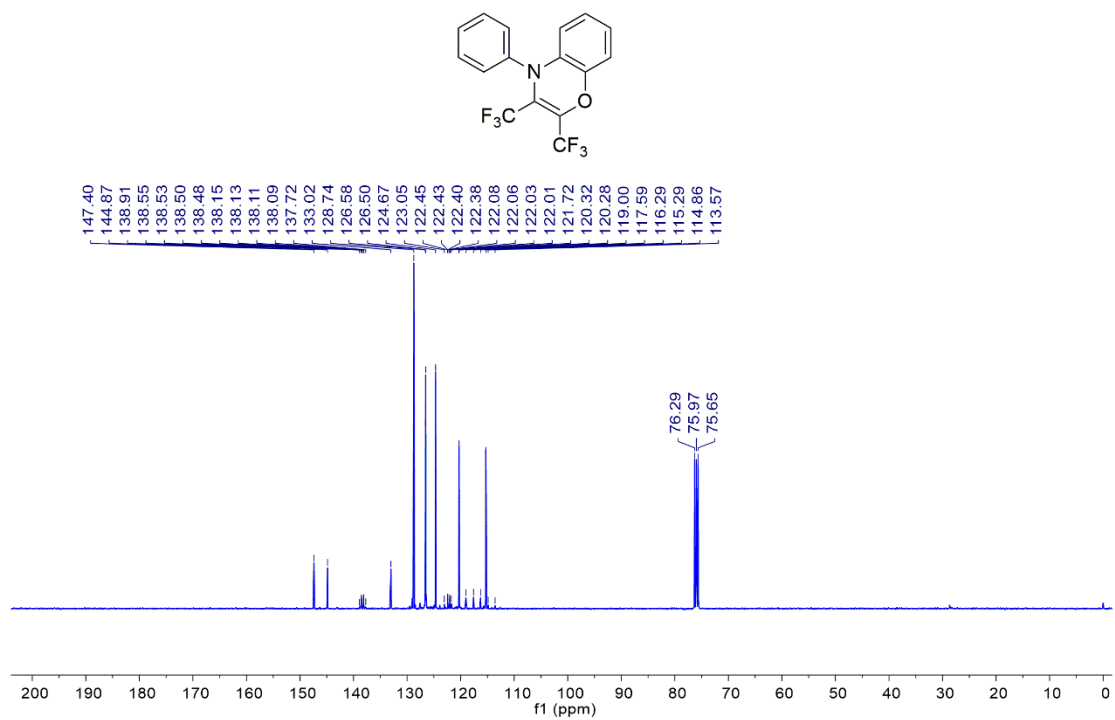

### <sup>19</sup>F-NMR spectrum of 5a

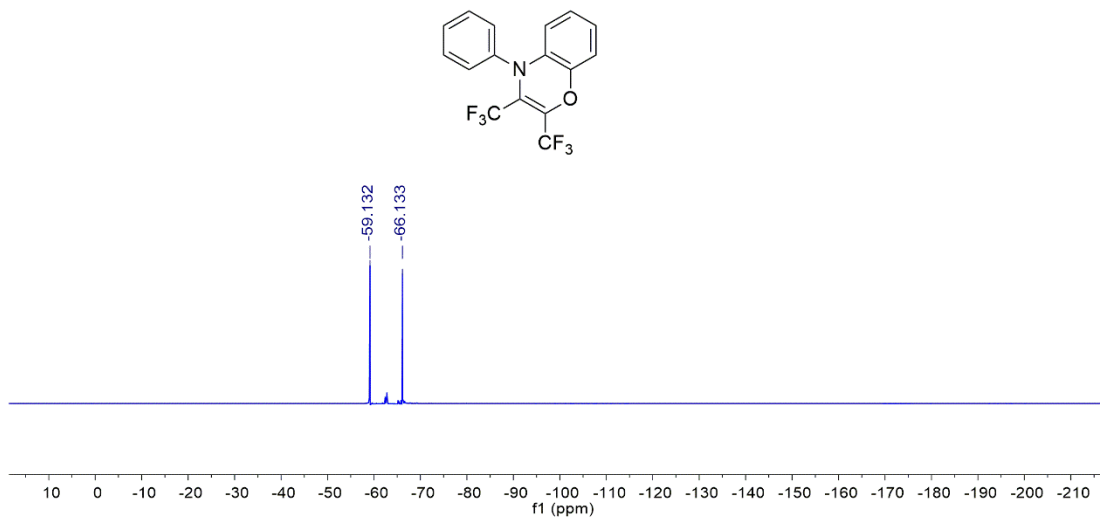

### <sup>1</sup>H-NMR spectrum of 6a

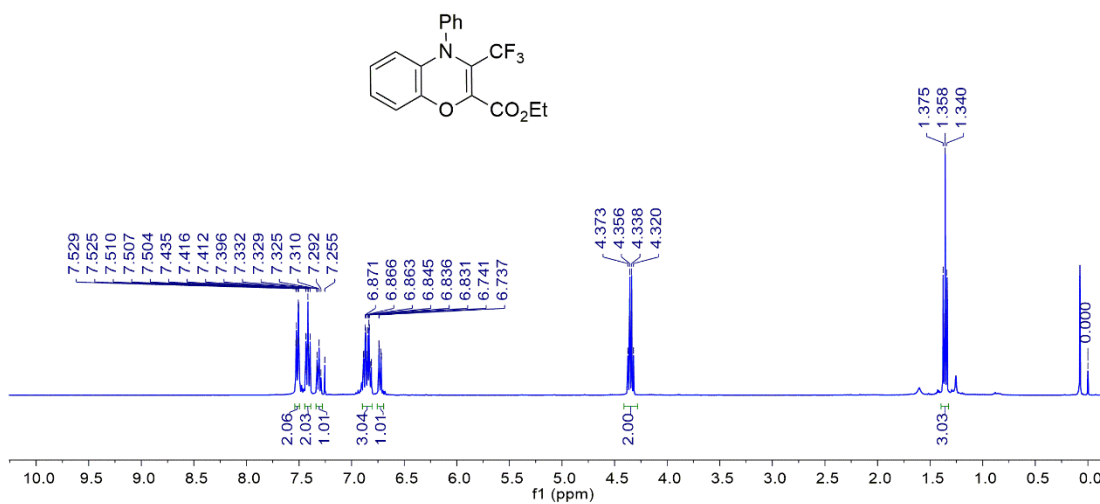

### <sup>13</sup>C-NMR spectrum of 6a

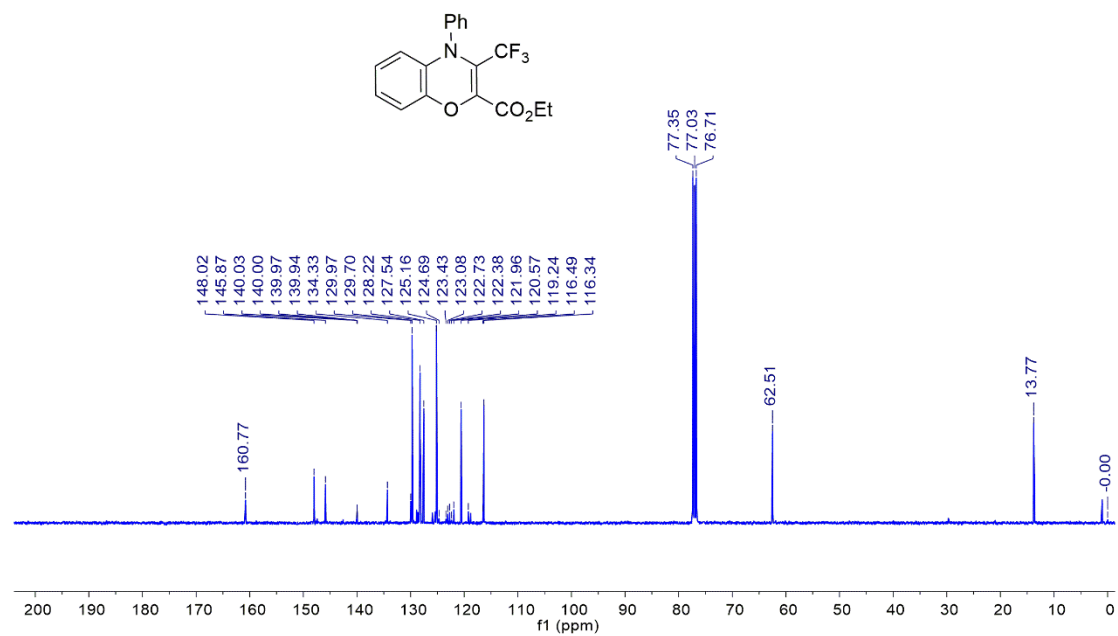

### <sup>19</sup>F-NMR spectrum of 6a

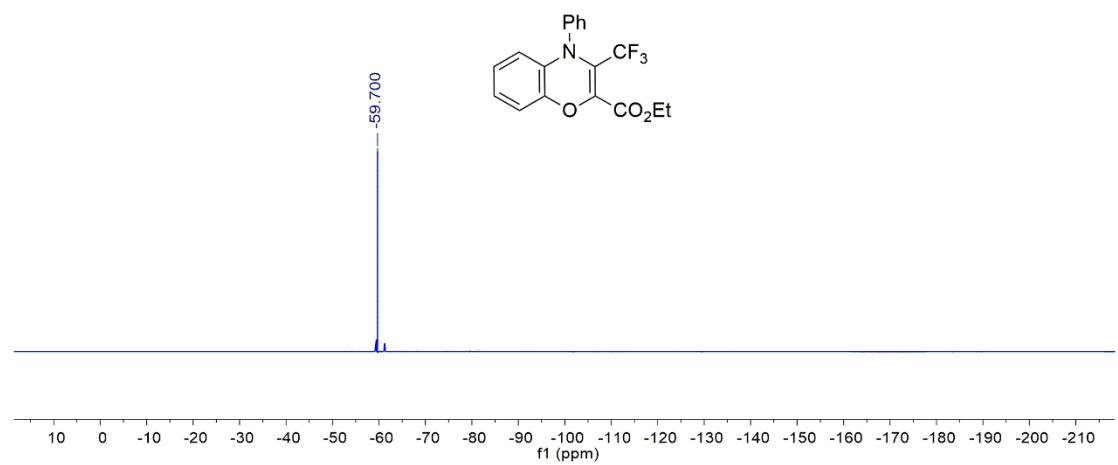

## HSQC spectrum of 3aa

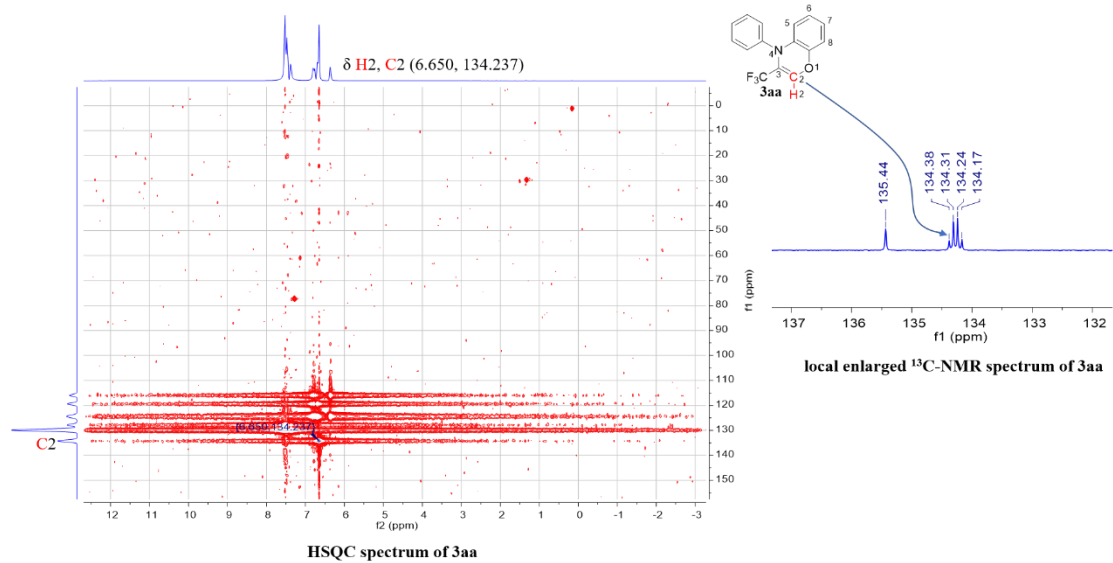

## HSQC spectrum of 6a

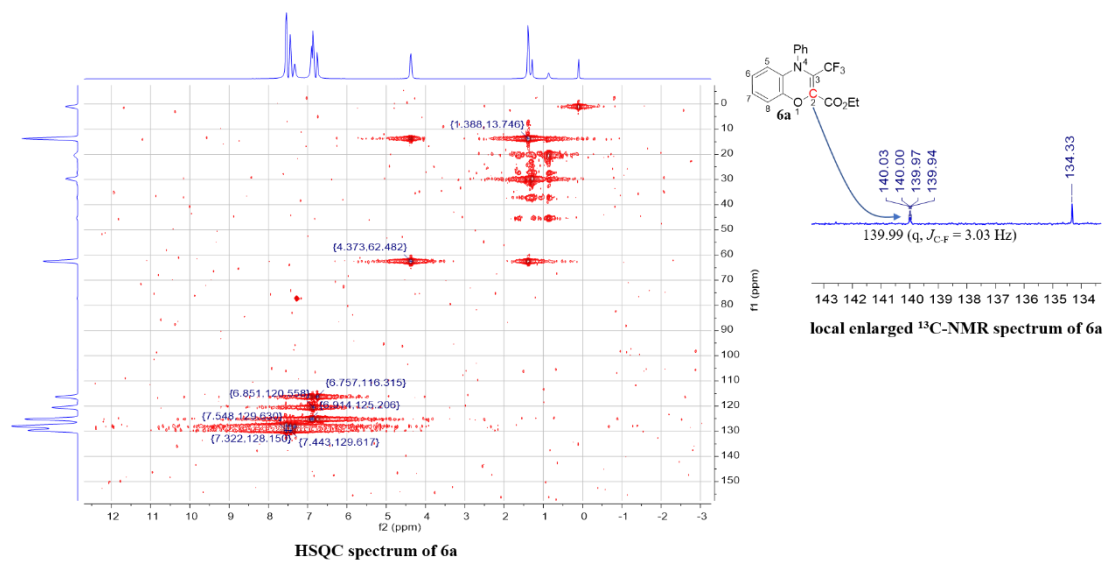

### <sup>1</sup>H-NMR spectrum of 7a

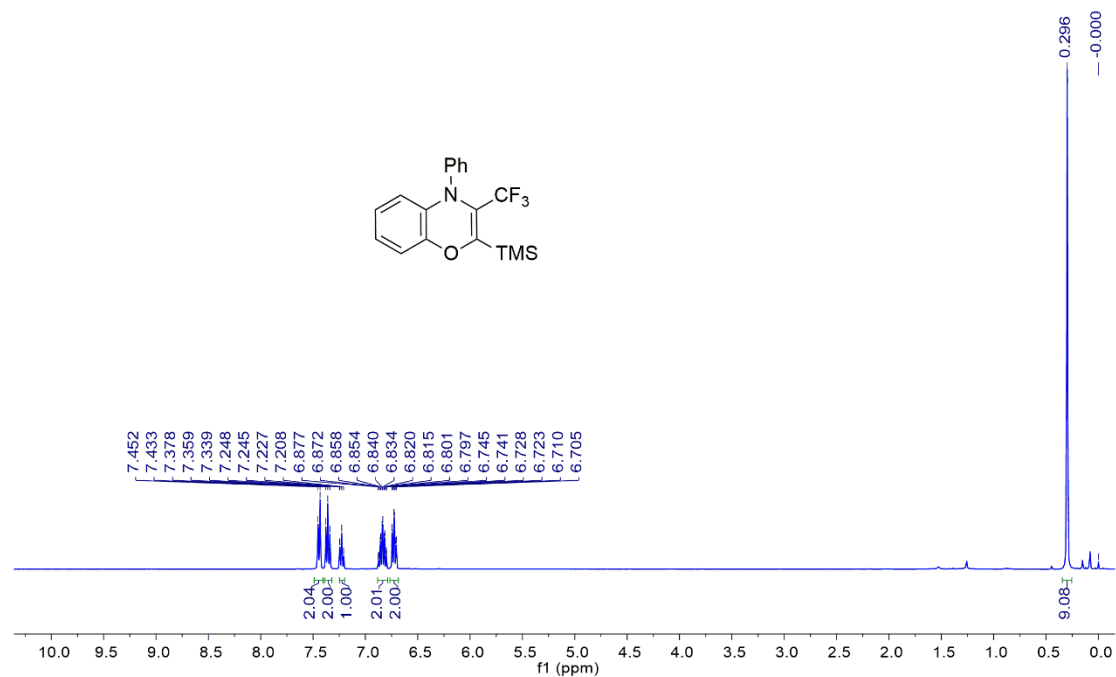

### <sup>13</sup>C-NMR spectrum of 7a

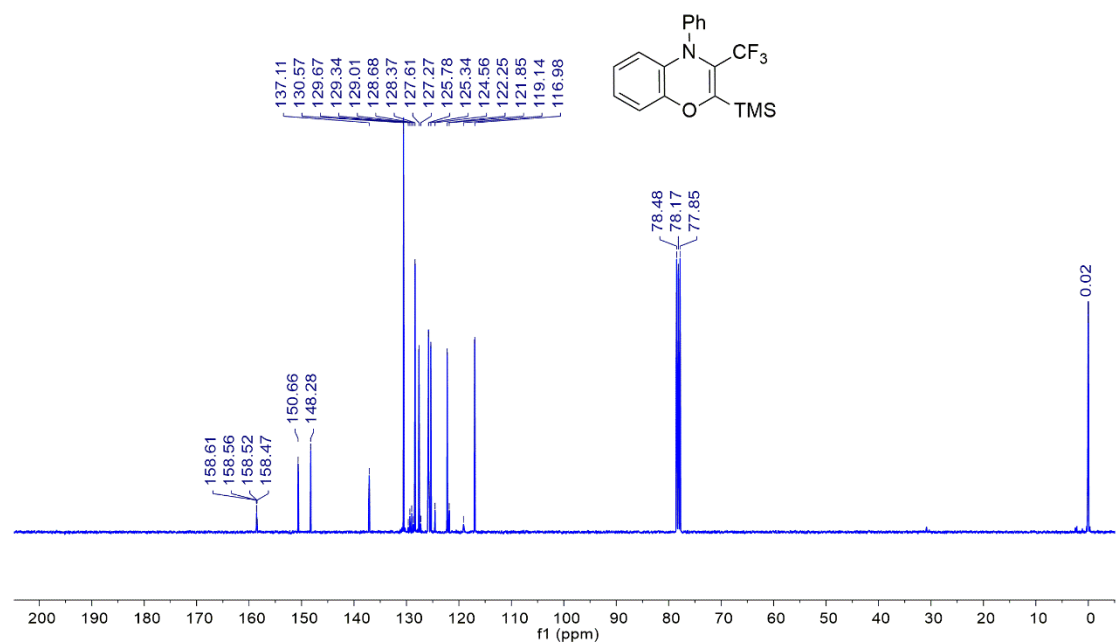



### <sup>19</sup>F-NMR spectrum of 7a

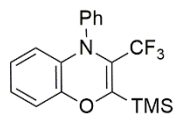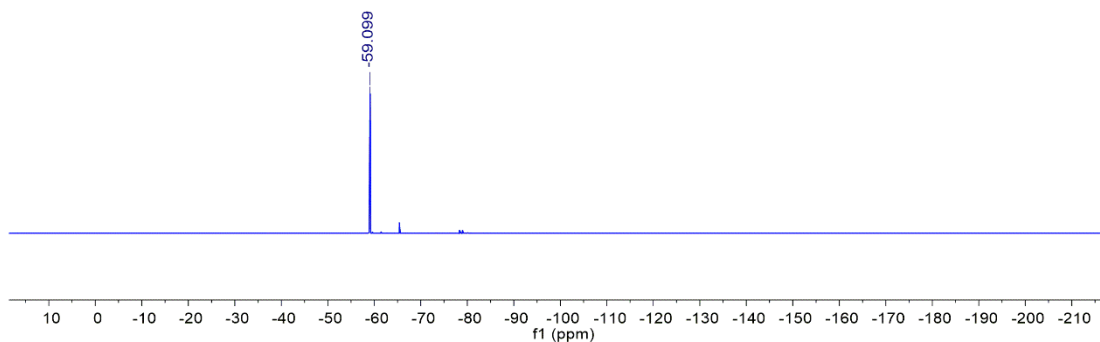

### <sup>1</sup>H-NMR spectrum of 3ae'

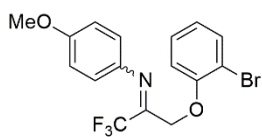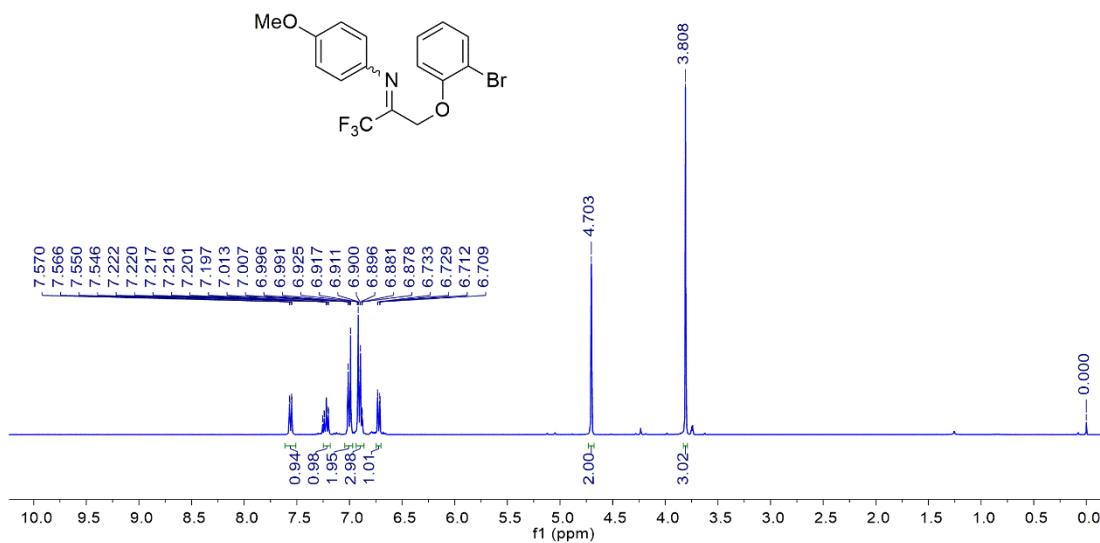

# <sup>13</sup>C-NMR spectrum of 3ae'

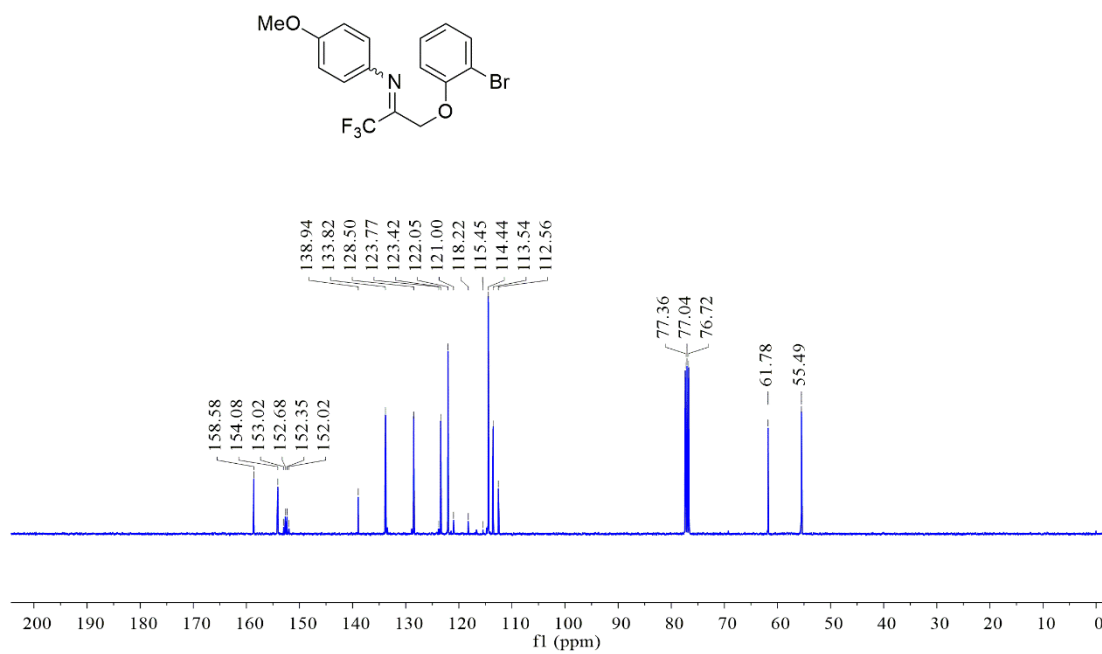

Supplement: d2cc04863a1.pdf [file d2cc04863a1.pdf]
